# Supplementary material for: Development of an in vitro cerebral ischemia model of the blood-brain barrier based on human induced pluripotent stem cells: The pivotal role of microenvironmental cells
Source: Research Square preprint supplement (doi:10.21203/rs.3.rs-6513614/v1), 2025-07-08
Supplement: Supplementary file 1 [file 543b31c897bf16df3d1f167e.docx]

**Supplementary Part**


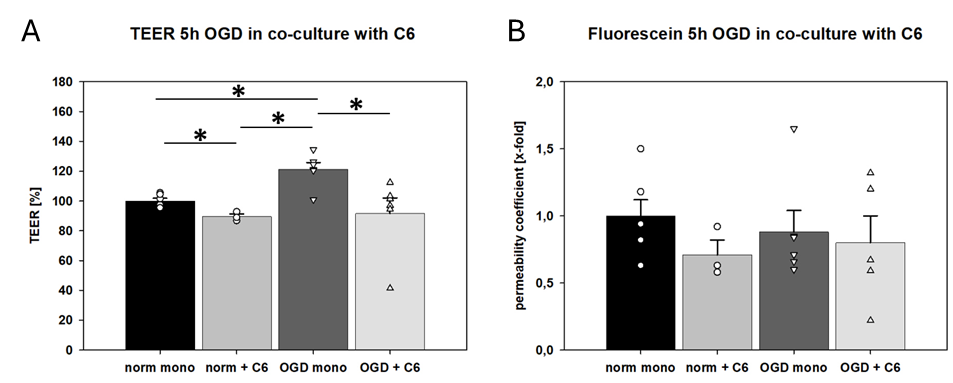


Supplementary figure 1: Assessment of barrier breakdown of BCELC in co-culture with rat glioma C6 cells after 5h OGD at 0.1% O2. TEER-values were normalized to mono-cultures after 5h under normoxic conditions (A). Permeability coefficient of 10 µM Fluorescein was normalized to mono-cultures after 5h under normoxic conditions (B). (N=2, n=4-6, ±SEM)


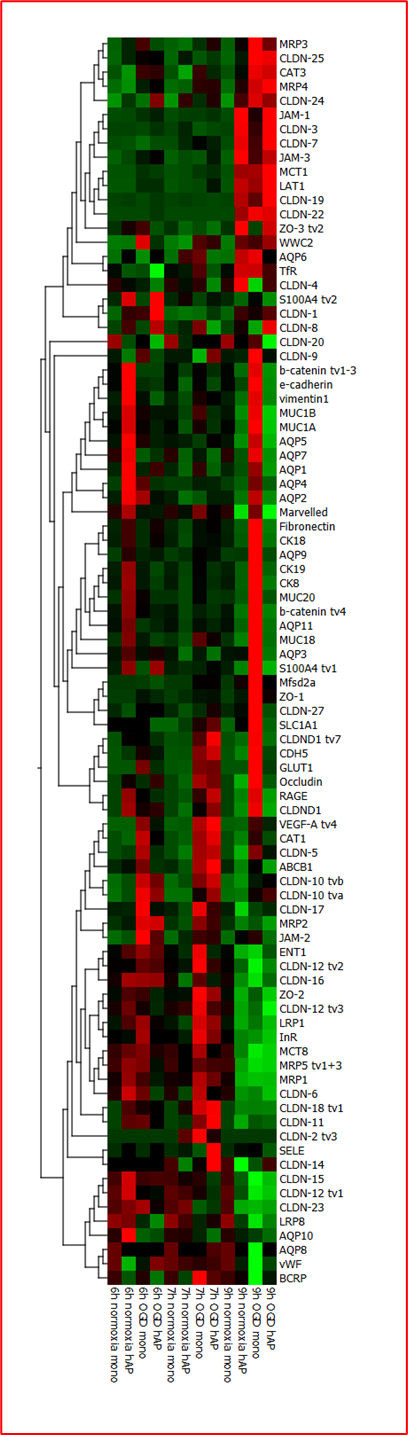

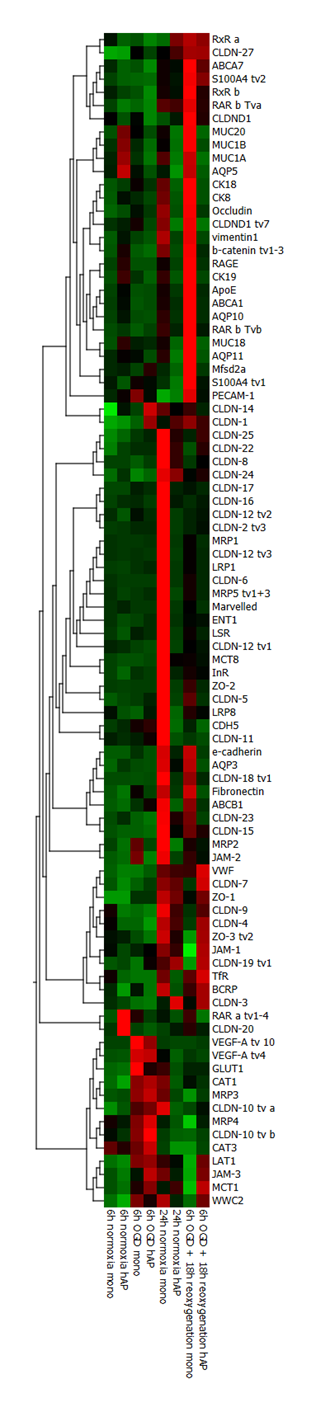

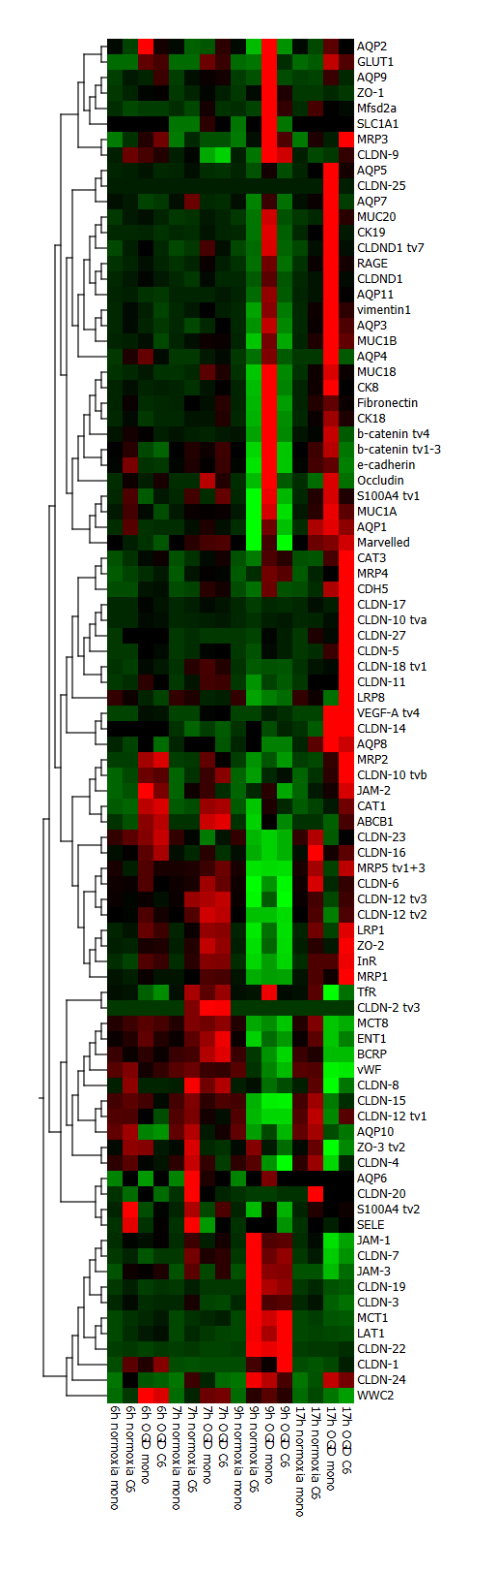


**B**

**C**

**A**

*
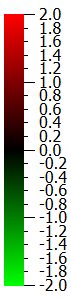
*

18h recovery phase hAP

18h recovery phase mono

Supplementary figure 2: Screening of transcriptomic changes in BCELC in different culture conditions after OGD treatment and after the 18h OGR. Heat maps showing the regulation of all measured targets and hierarchical clustering according to regulation. MRNA changes in BCELC after 6h, 7h, 9h or 17h OGD in mono- or co-culture with rat glioma C6 cells compared to mono- and co-cultures under normoxic conditions (A). MRNA expression level changes of BCELC in mono- and triple culture with human primary astrocytes and pericytes (hAP) after 6h, 7h and 9h OGD and after 6h, 7h and 9h under normoxic conditions (B). Mono-cultures under normoxic conditions for each time point were used as control for normalization. Effects of triple-culture of BCELC with human primary astrocytes and pericytes (hAP) on mRNA expression of BBB relevant targets after 6h OGD followed by an 18h recovery phase at normoxic conditions (C). Mono-cultures after 6h OGD were used as control for normalization. N=4; n=1-4


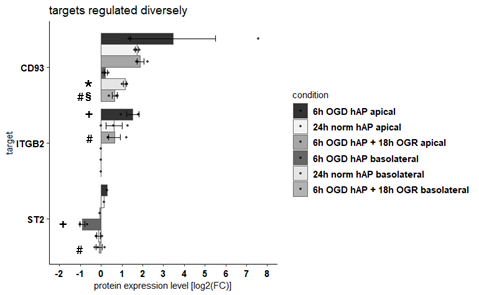


Supplementary figure 3: Effects of OGD on the protein secretion of BCELC, human primary astrocytes and pericytes (hAP) into the media supernatants apically and basolaterally after 6h OGD, 6h OGD followed by 18h oxygen/glucose restoration (OGR) as well as after 24h under normoxic conditions with glucose (24h norm hAP). Protein secretion levels were normalized to triple-cultures under normoxic conditions for 6h. The depicted targets were significantly regulated but could not be assigned to a specific regulatory group by hierarchical clustering. Data are presented as mean ± SEM, N=4, n=9-12; ***** 24h normoxia significant against 6h normoxia, **+** 6h OGD significant against 6h normoxia, **§** 18h OGR significant against 24h normoxia, **#** 18h OGR significant against 6h OGD; Two-Way ANOVA with all pairwise multiple comparison Holm-Sidak in case of non-normality distribution or non-equal variances, significant targets with p<0.05.

*
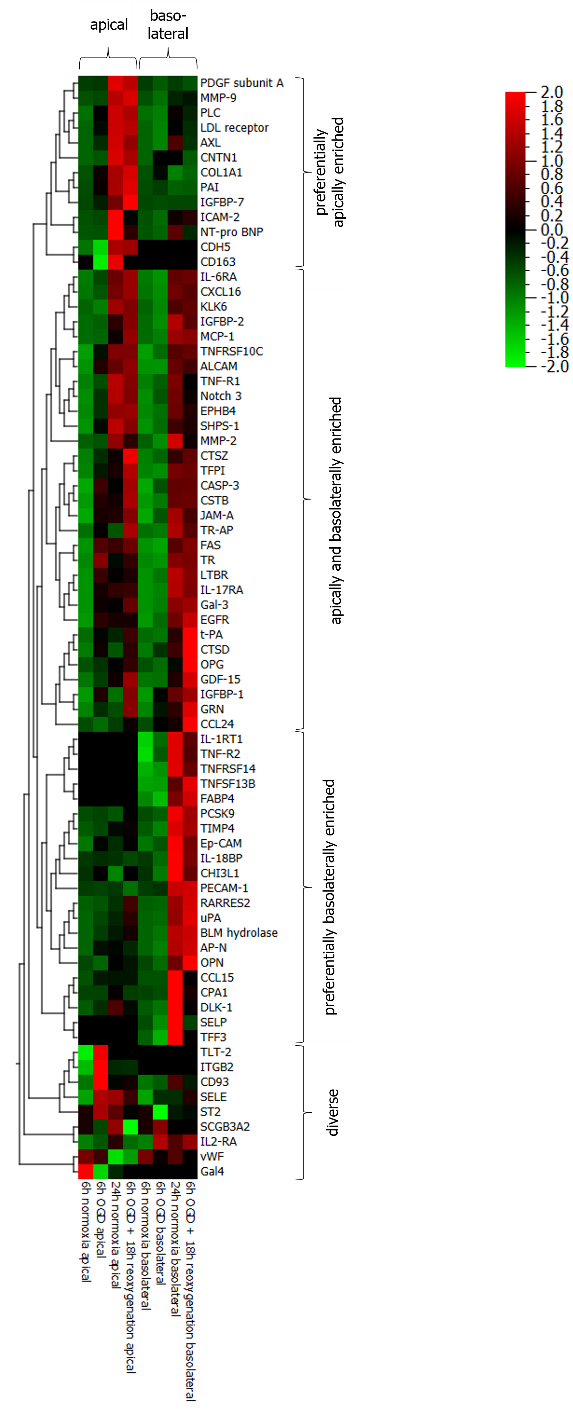
*

Supplementary figure 4: Heat map with hierarchical clustering of secreted proteins in the apical and basolateral medium supernatants from triple-cultures of BCELC with human primary astrocytes and pericytes (hAP). Cells were treated with 6h OGD followed by an 18h recovery phase under normoxic conditions with restored glucose levels and were compared to cells under 6h normoxic conditions or under 24h normoxic conditions. Secretion levels in apical respectively basolateral samples were normalized to protein concentrations in apical respectively basolateral samples after 6h under normoxic conditions. Targets were clustered according to secretion level. N=4, n=9-12

18h OGR basolateral

18h OGR apical

*
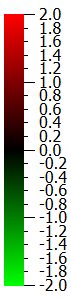
*
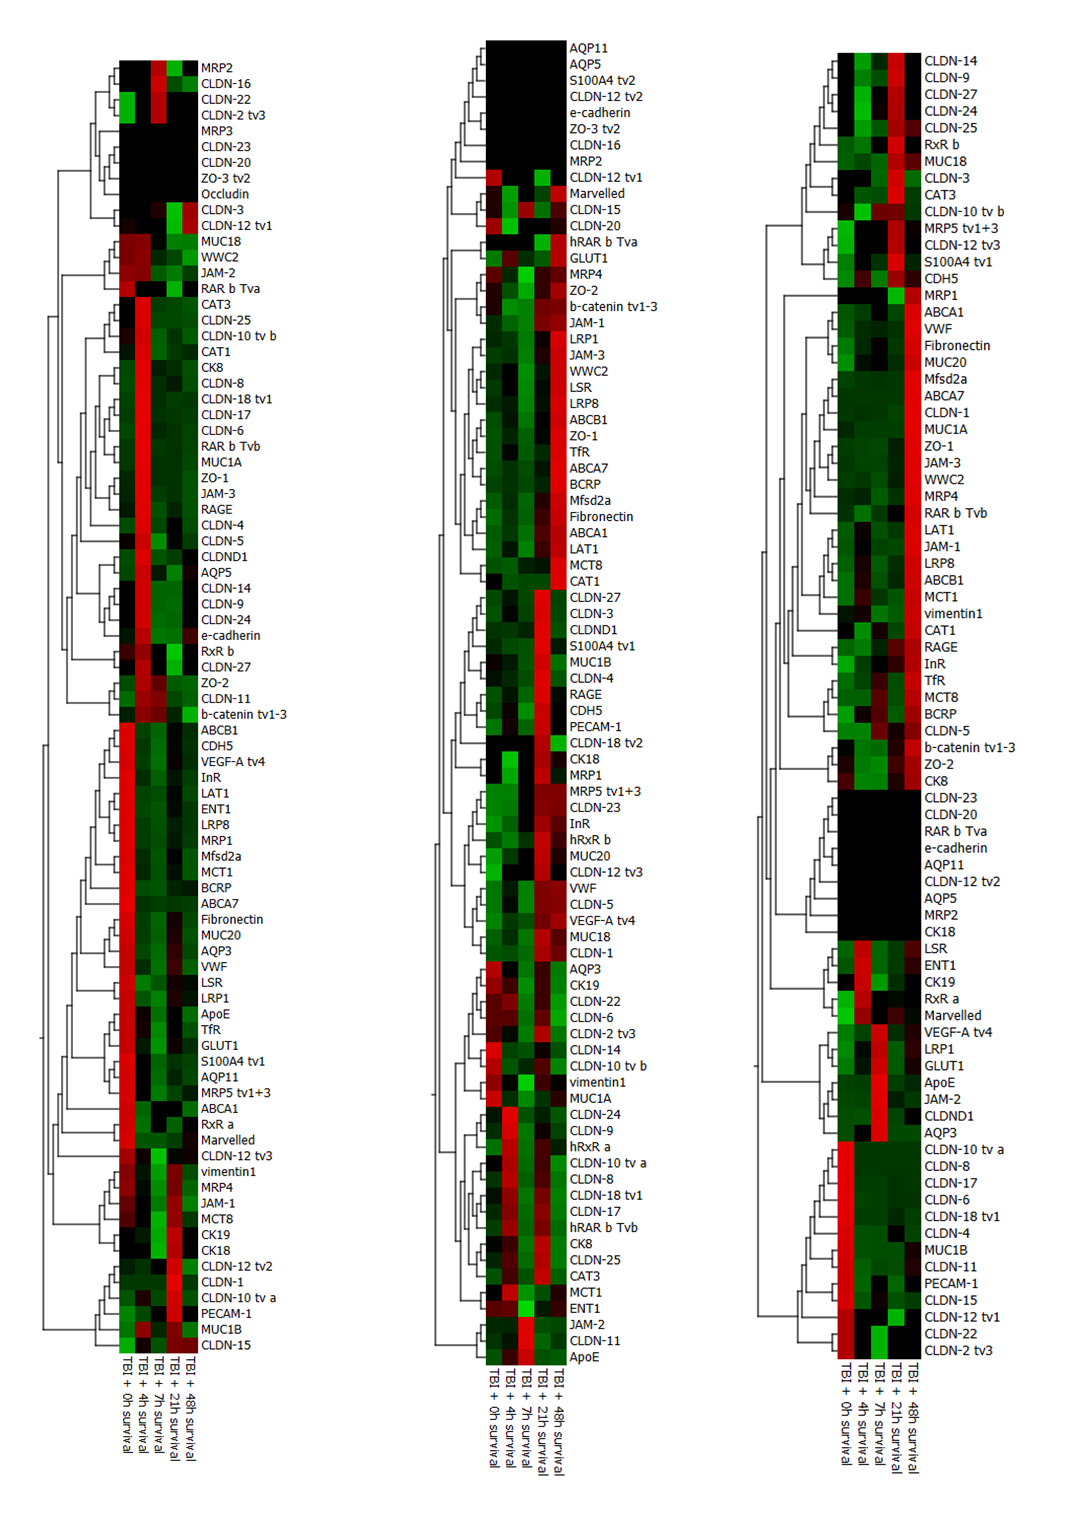


**B**

**A**

Supplementary figure 5: Hierarchical clustering of transcriptomic changes of brain tissue samples from patients suffering from traumatic brain injury (TBI) with different times of death (0h, 4h, 21h, 48h survival after TBI). Total brain samples from the contusional area were normalized to total brain samples from the contralateral area (A) and isolated capillaries form the contusional area were normalized to isolated capillaries from the contralateral area (B). N=1, n=1


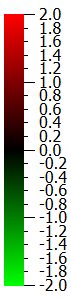

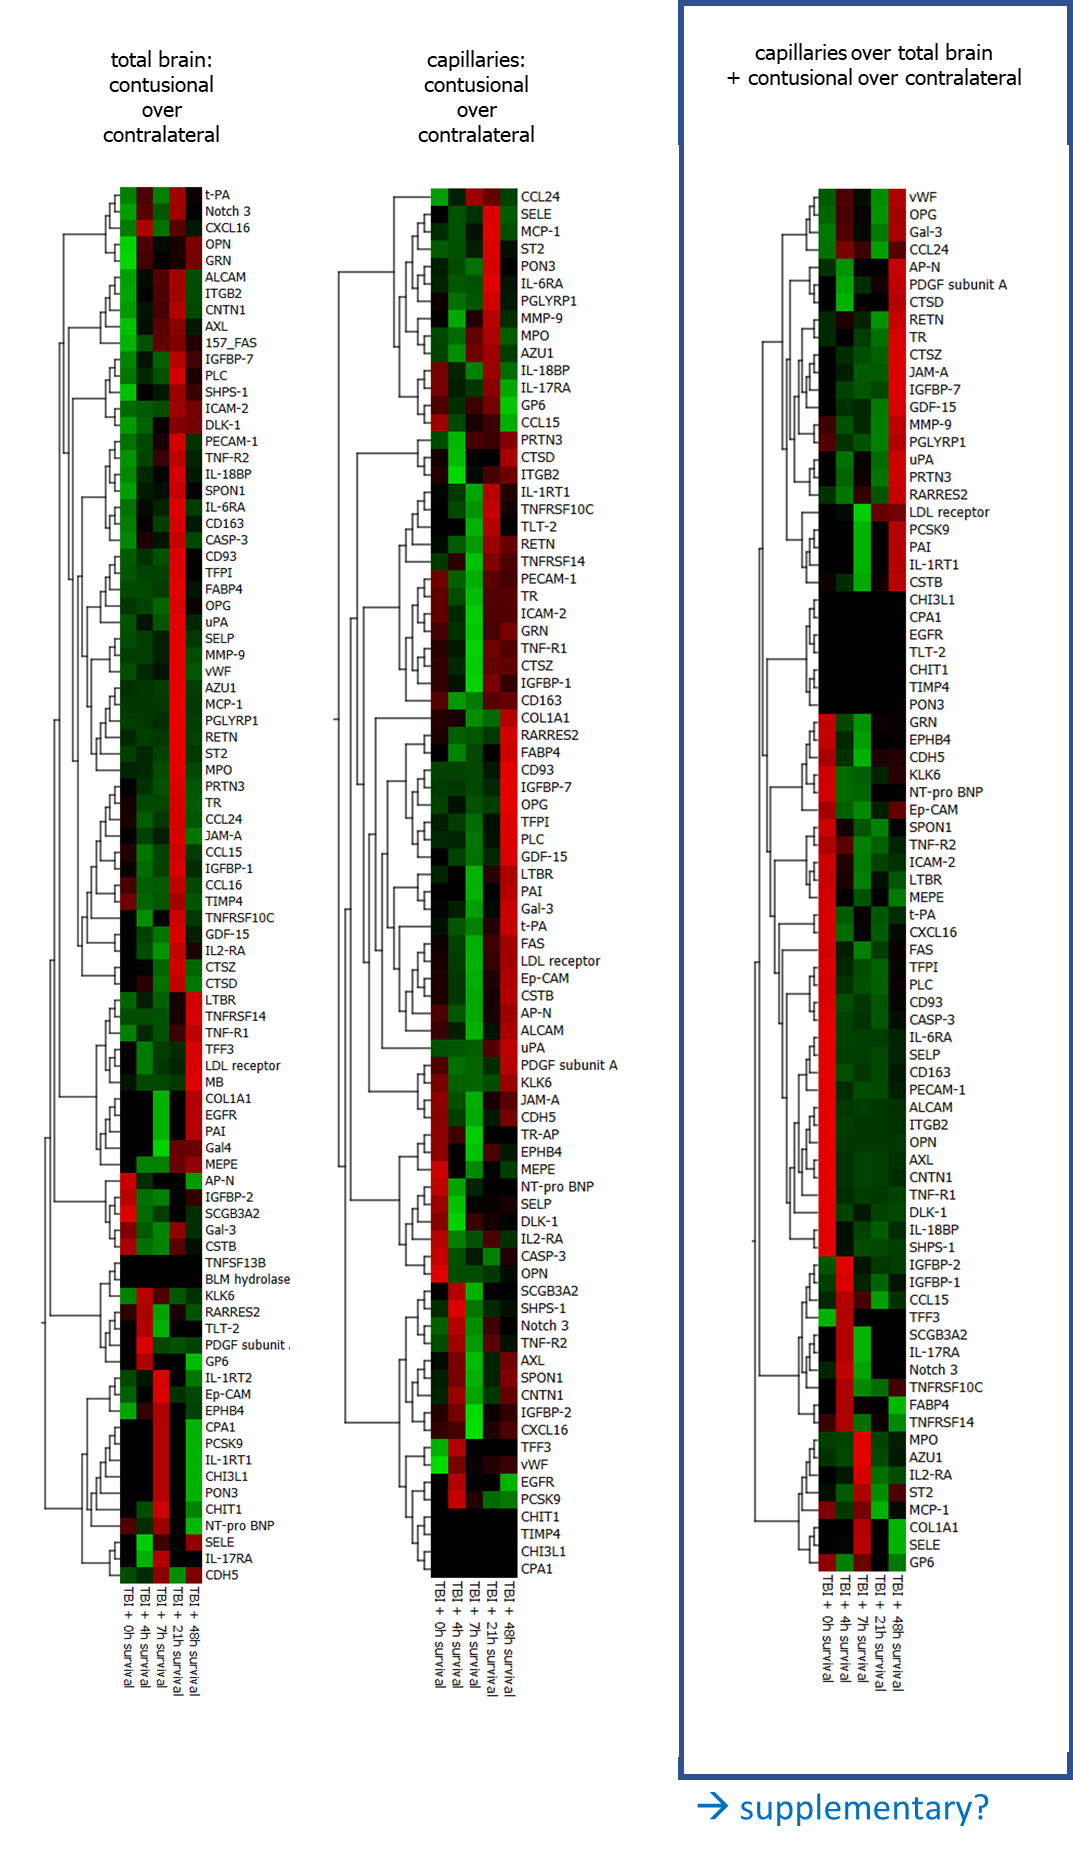


**A**

**B**

Supplementary figure 6: Hierarchical clustering of proteomic changes of autopsy samples from patients suffering from traumatic brain injury (TBI) with different times of death (0h, 4h, 21h, 48h survival after TBI). Total brain samples from the contusional area were normalized to total brain samples from the contralateral area (A) and isolated capillaries form the contusional area were normalized to isolated capillaries from the contralateral area (B). N=1, n=1

Supplementary table 1: TEER-values (Ω cm2) for BCELC cultured on 24-well inserts (BD) in mono- or co-culture with glioma C6 cells after 5h OGD or under normoxic conditions (N=2, n=4-6, mean ±SEM). * significant against normoxia mono-culture, # significant against normoxia C6, § significant against OGD mono, p<0.05; student’s t-test

| *Ω****cm2** | **Norm mono** | **Norm C6** | **OGD mono** | **OGD C6** |
| --- | --- | --- | --- | --- |
| Insert 1 | 4395.11 | 3613.01 | 5033.00 | 4221.20 |
| Insert 2 | 4055.21 | 3863.81 | 5016.50 | 4297.10 |
| Insert 3 | 3962.81 | 3702.11 | 5257.40 | 4676.60 |
| Insert 4 | 4226.81 | 781.61 | 5178.20 | 4036.40 |
| Insert 5 | 591.69 | / | 833.58 | 255.97 |
| Insert 6 | 647.79 | / | 625.68 | 585.97 |
| **average** | **2980** ± 684 | **2990** ± 639 ***** | **3657** ± 846 ***#** | **3012** ± 753 **§** |

Supplementary table 2: Permeability coefficient (µm/min) for BCELC cultured on 24-well inserts (BD) in mono- or co-culture with glioma cells C6 after 5h OGD or under normoxic conditions (N=2, n=3-6, mean ±SEM). No significances detected, student’s t-test

| **µm/min** | **Norm mono** | **Norm C6** | **OGD mono** | **OGD C6** |
| --- | --- | --- | --- | --- |
| Insert 1 | 0.50 | 0.74 | 0.57 | 0.96 |
| Insert 2 | 1.20 | 0.51 | 0.68 | 0.54 |
| Insert 3 | 0.75 | 0.46 | 0.52 | 0.18 |
| Insert 4 | 0.75 | / | 0.48 | 0.48 |
| Insert 5 | 0.88 | / | 0.62 | 0.98 |
| Insert 6 | 0.61 | / | 1.23 | / |
| **average** | **0.78** ± 0.10 | **0.57** ± 0.09 | **0.69** ± 0.11 | **0.63** ± 0.15 |

Supplementary table 3: TEER-values and permeability coefficients for BCELC in mono-, co- or triple-culture with glioma C6 cells or human primary astrocytes and pericytes (hAP) after 6h, 7h, 9h and 17h OGD treatment, after normoxic conditions and after treatment in endothelial SFM (N=4, n=11-16, mean±SEM). Two-way ANOVA with all pairwise multiple comparison Holm-Sidak in case of non-normality distribution or non-equal variances, p<0.05; * significant against normoxia mono-culture, **#** significant against normoxia C6, **&** significant against norm hAP, **§** significant against OGD mono, **+** significant against OGD C6; significances were calculated within the same OGD exposure times. () indicates a trending regulation. For trending regulations: p< 0.066

| Time | Culture condition | Average TEER ± SEM [Ohm cm2] | Average TEER ± SEM [%] | Average PC ± SEM [µm/min] | Average PC ± SEM [xfold] |
| --- | --- | --- | --- | --- | --- |
| 6h normoxia | Mono SFM | 5740 ± 213 | 231 ± 40 | 0.51 ± 0.04 | 1.33 ± 0.17 |
| 6h normoxia | Mono | 2959 ± 304 | 100 ± 2 | 0.46 ± 0.05 | 1.00 ± 0.04 |
| 6h normoxia | C6 | 2818 ± 293 | 96 ± 5 | 0.54 ± 0.06 | 1.21 ± 0.06 |
| 6h normoxia | hAP | 2542 ± 285 | *76 ± 7* | 0.56 ± 0.03 ***** | 1.36 ± 0.13 ***** |
| 6h OGD | Mono | 4254 ± 394 ***** | 155 ± 17 ***** | 0.41 ± 0.03 | 0.99 ± 0.08 |
| 6h OGD | C6 | 1272 ± 198 **#§** | 42 ± 4 **#§** | 0.94 ± 0.15 **#§** | 2.16 ± 0.33 **#§** |
| 6h OGD | hAP | 1173 ± 214 **&§** | 38 ± 6  **&§** | 0.84 ± 0.09 **&§** | 1.81 ± 0.15 **&§** |
| 7h normoxia | Mono SFM | 5280 ± 488 | 153 ± 10 | 0.37 ± 0.02 | 0.71 ± 0.11 |
| 7h normoxia | Mono | 3324 ± 234 | 100 ± 5 | 0.52 ± 0.09 | 1.00 ± 0.09 |
| 7h normoxia | C6 | 3324 ± 383 | 98 ± 8 | 0.62 ± 0.09 | 1.30 ± 0.10 |
| 7h normoxia | hAP | 3358± 303 | 98 ± 6 | 0.48 ± 0.08 | 1.29 ± 0.21 |
| 7h OGD | Mono | 5785 ± 257 ***** | 177 ± 9 ***** | 0.48 ± 0.04 | 0.86 ± 0.10 |
| 7h OGD | C6 | 814 ± 74  **#§** | 25 ± 2  **#§** | 1.12 ± 0.21 **#§** | 2.82 ± 0.28 **#§** |
| 7h OGD | hAP | 379 ± 65  **&§** | 13 ± 3  **&§** | 1.11 ± 0.09 **&§** | 2.04 ± 0.19 **&§** |
| 9h normoxia | Mono SFM | 4170 ± 107 | 136 ± 1 | 0.53 ± 0.05 | 6.38 ± 0.48 |
| 9h normoxia | Mono | 3061 ± 93 | 100 ± 2 | 0.17 ± 0.04 | 1.00 ± 0.12 |
| 9h normoxia | C6 | 3179 ± 117 | 104 ± 3 | 0.37 ± 0.05 | 2.61 ± 0.23 |
| 9h normoxia | hAP | 3304 ± 87 | 108 ± 2 | 0.15 ± 0.03 | 1.10 ± 0.16 |
| 9h OGD | Mono | 2724 ± 271 **(*)** | 88 ± 8 | 0.28 ± 0.06 | 1.62 ± 0.26 |
| 9h OGD | C6 | 18 ± 2  **#§** | 0.6 ± 0.1  **#§** | 46.06 ± 8.14 **#§** | 306.74 ± 40.67 **#§** |
| 9h OGD | hAP | 12 ± 2 **&§** | 0.4 ± 0.1 **&§** | 53.74 ± 7.86 **&§** | 498.71 ± 78.46 **&§** |
| 17h | Mono SFM | 1707 ± 139 | 78 ± 8 | 3.80 ± 0.18 | 5.22 ± 0.39 |
| 17h normoxia | Mono | 2210 ± 182 | 100 ± 4 | 0.68 ± 0.04 | 1.00 ± 0.04 |
| 17h normoxia | C6 | 2211 ± 167 | 96 ± 3 | 0.85 ± 0.05 | 1.27 ± 0.07 |
| 17h OGD | Mono | 262 ± 61 ***** | 14 ± 4 ***** | 6.31 ± 1.39 | 9.88 ± 2.40 |
| 17h OGD | C6 | 5 ± 1 **#** | 0.2 ± 0.1 **#** | 168.00 ± 50.65 **#§** | 276.39 ± 74.17 **#§** |

Supplementary table 4: TEER-values and permeability coefficients for BCELC in mono- or triple-culture with human primary astrocytes and pericytes (hAP) after 6h or 24h under normoxic conditions, after 6h OGD, after 6h OGD followed by 18h OGR or after 24h treatment in endotehlial SFM (N=4, n=9-12, mean±SEM). Two-way ANOVA with all pairwise multiple comparison Holm-Sidak in case of non-normality distribution or non-equal variances, p<0.05; * significant against 6h normoxia mono-culture, **#** significant against 6h normoxia hAP, **§** significant against OGD mono, **&** significant against 6h OGD hAP

| Time | Culture condition | Average TEER ± SEM [Ohm cm2] | Average TEER ± SEM [%] | Average PC ± SEM [µm/min] | Average PC ± SEM [xfold] |
| --- | --- | --- | --- | --- | --- |
| 6h normoxia | Mono SFM | 4888 ± 358 | 109 ± 6 | 0.43 ± 0.21 | 0.81 ± 0.14 |
| 6h normoxia | Mono | 4302 ± 396 | 100 ± 8 | 0.20 ± 0.02 | 1.00 ± 0.02 |
| 6h normoxia | hAP | 4626 ± 285 | 108 ± 4 | 0.21 ± 0.01 | 1.01 ± 0.06 |
| 6h OGD | Mono | 4084 ± 118 | 97 ± 6 | 0.14 ± 0.01 | 0.66 ± 0.04 |
| 6h OGD | hAP | 217 ± 10  ***#§** | 5 ± 0.4  ***#§** | 0.79 ± 0.06 ***#§** | 3.94 ± 0.32 ***#§** |
| 24h normoxia | Mono SFM | 4140 ± 214 | 137 ± 4 | 0.31 ± 0.01 | 1.18 ± 0.07 |
| 24h normoxia | Mono | 3050 ± 183 | 100 ± 2 | 0.27 ± 0.02 | 1.00 ± 0.03 |
| 24h normoxia | hAP | 3534 ± 227 | 116 ± 4 | 0.28 ± 0.01 | 1.07 ± 0.05 |
| 6h OGD + 18h recovery | Mono | 3101 ± 301 | 100 ± 5 | 0.26 ± 0.02 | 0.96 ± 0.03 |
| 6h OGD + 18h recovery | hAP | 3031 ± 472  **&** | 94 ± 11  **&** | 0.28 ± 0.02 **&** | 1.03 ± 0.04  **&** |

Supplementary table 5: Average values of mRNA expression levels in BCELC after 6h OGD in mono- or co-culture with the rat glioma C6 cells in comparison to the average values of mRNA expression in BCELC in mono-culture after 6h under normoxic conditions. Normalized to endogenous control PPIA. Values are given as x-fold ± SEM. N=4, n=1-4, two-way ANOVA with all pairwise multiple comparison Holm-Sidak in case of non-normality distribution or non-equal variances, p-value=0.05, * significant against normoxia mono, § significant against normoxia C6, # significant against OGD mono. () indicates a trending regulation. For trending regulations: p< 0.075; n.d. not detectable; (n=1) indicates targets that were detect in only one sample

|  | Normoxia mono 6h | Normoxia C6  6h | OGD mono  6h | OGD C6  6h |
| --- | --- | --- | --- | --- |
| PPIA | 1.00 ± 0.00 | 1.00 ± 0.00 | 1.00 ± 0.00 | 1.00 ± 0.00 |
| b-actin | 1.00 ± 0.00 | 1.07 ± 0.26 | 1.37 ± 0.26 | 1.11 ± 0.26 |
| GADPH | 1.00 ± 0.00 | 1.00 ± 0.26 | 1.40 ± 0.16 | 1.15 ± 0.11 |
| B2M | 1.00 ± 0.00 | 0.92 ± 0.22 | 1.36 ±0.24 | 1.16 ± 0.27 |
| CLDN-1 | 1.00 ± 0.00 | 3.59 ± 1.94 | 2.74 ± 0.34 | 4.29 ± 1.96 |
| CLDN-2 | 1.00 ± 0.00 | 0.72 ± 0.30 | 2.15 ± 0.30 | 1.69 ± 0.49 |
| CLDN-3 | 1.00 ± 0.00 | 1.24 ± 0.10 | 0.95 ± 0.06 | 0.98 ± 0.08 |
| CLDN-4 | 1.00 ± 0.00 | 1.04 ± 0.20 | 0.95 ± 0.07 | 0.93 ± 0.07 |
| CLDN-5 | 1.00 ± 0.00 | 1.10 ± 0.10 | 2.69 ± 0.69 ***** | 2.44 ± 0.39 **§** |
| CLDN-6 | 1.00 ± 0.00 | 0.98 ± 0.20 | 1.19 ± 0.27 | 0.97 ± 0.21 |
| CLDN-7 | 1.00 ± 0.00 | 1.07 ± 0.11 | 0.88 ± 0.05 | 0.99 ± 0.12 |
| CLDN-8 | 1.00 ± 0.00 | 1.68 ± 0.27 | 0.99 ± 0.23 | 0.99 ± 0.11 |
| CLDN-9 | 1.00 ± 0.00 | 1.31 ±0.12 | 1.24 ± 0.20 | 1.16 ± 0.15 |
| CLDN-10tva | 1.00 ± 0.00 | 1.15 ± 0.38 | 3.36 ± 0.21 ***** | 3.12 ± 0.36 **§** |
| CLDN-10tvb | 1.00 ± 0.00 | 1.18 ± 0.24 | 2.43 ± 0 46 ***** | 2.29 ± 0.13 **§** |
| CLDN-11 | 1.00 ± 0.00 | 1.07 ± 0.36 | 1.84 ± 0 37 | 1.44 ± 0.10 |
| CLDN-12 tv1 | 1.00 ± 0.00 | 0.98 ± 0.24 | 0.76 ± 0 16 | 0.53 ± 0.10 |
| CLDN-12 tv2 | 1.00 ± 0.00 | 0.99 ±0.02 | 1.19 ± 0.02 ***** | 1.05 ± 0.04 (#) |
| CLDN-12 tv3 | 1.00 ± 0.00 | 0.96 ± 0.13 | 1.00 ± 0 04 | 0.94 ± 0.04 |
| CLDN-14 | n.d. | n.d. | n.d. | n.d. |
| CLDN-15 | 1.00 ± 0.00 | 1.07 ± 0.18 | 0.99 ± 0 14 | 0.77 ± 0.13 |
| CLDN-16 | 1.00 ± 0.00 | 1.08 ± 0.57 | 1.43 ± 0.22 | 1.73 ± 0.62 |
| CLDN-17 | 1.00 ± 0.00 | 0.93 ± 0.08 | 2.04 ± 0.44 ***** | 1.62 ± 0.27 |
| CLDN-18 | 1.00 ± 0.00 | 0.77 ± 0.22 | 1.79 ± 0.63 | 1.51 ± 0.59 |
| CLDN-19 | 1.00 ± 0.00 | 1.58 ± 0.16 ***** | 0.89 ± 0.17 | 1.07 ± 0.09 **§** |
| CLDN-20 | 1.00 ± 0.00 | 0.12 ± 0.00 (n=1) | n.d. | 0.13 ± 0.00 (n=1) |
| CLDN-21 | 1.00 ± 0.00 | 1.88 ± 0.34 | 4.14 ± 0.41 (*) | 4.38 ± 1.16 |
| CLDN-22 | 1.00 ± 0.00 | 1.79 ± 0.41 | 0.87 ± 0.26 | 1.56 ± 0.35 |
| CLDN-23 | 1.00 ± 0.00 | 1.12 ± 0.32 | 1.25 ± 0.49 | 1.44 ± 0.54 |
| CLDN-24 | 1.00 ± 0.00 | 1.89 ± 0.69 | 1.20 ± 0.34 | 1.13 ± 0.28 |
| CLDN-25 | 1.00 ± 0.00 | 1.29 ± 0.44 | 1.58 ± 0.27 | 1.25 ± 0.20 |
| CLDN-25 tv7 | 1.00 ± 0.00 | 1.86 ± 0.83 | 2.47 ± 0.29 | 1.60 ± 0.30 |
| CLDN-27 | n.d. | n.d. | n.d. | n.d. |
| JAM-1 | 1.00 ± 0.00 | 1.11 ± 0.13 | 1.08 ± 0.06 | 1.13 ± 0.10 |
| JAM-2 | 1.00 ± 0.00 | 1.08 ± 0.16 | 2.46 ± 0.35 ***** | 1.81 ± 0.20 **§** |
| JAM-3 | 1.00 ± 0.00 | 1.24 ± 0.11 | 1.22 ± 0 09 | 1.29 ± 0.19 |
| ZO-1 | 1.00 ± 0.00 | 1.23 ± 0.09 | 1.54 ± 0 14 ***** | 1.66 ± 0.25 (**§**) |
| ZO-2 | 1.00 ± 0.00 | 0.98 ± 0.13 | 1.24 ± 0.19 | 1.25 ± 0.27 |
| ZO-3 | 1.00 ± 0.00 | 1.22 ± 0.21 | 1.21 ± 0 18 | 0.97 ± 0.15 |
| vWF | 1.00 ± 0.00 | 1.11 ± 0.13 | 0.82 ± 0 13 | 0.90 ± 0.10 |
| GLUT-1 | 1.00 ± 0.00 | 1.04 ± 0.05 | 6.26 ± 1.06 ***** | 5.52 ± 1.07 **§** |
| Occludin | 1.00 ± 0.00 | 1.20 ± 0.32 | 1.06 ± 0.27 | 1.24 ± 0.23 |
| CDH5 | 1.00 ± 0.00 | 1.04 ± 0.25 | 2.22 ± 0.43 | 2.30 ± 0.67 (**§)** |
| ABCB1 | 1.00 ± 0.00 | 0.84 ± 0.07 | 1.86 ± 0.44 (***)** | 2.05 ± 0.40 **§** |
| MRP-1 | 1.00 ± 0.00 | 0.93 ± 0.24 | 1.17 ± 0.19 | 1.00 ± 0.20 |
| MRP-2 | 1.00 ± 0.00 | 0.98 ± 0.16 | 2.33 ± 0.17 ***** | 2.67 ± 0.45 **§** |
| MRP-3 | 1.00 ± 0.00 | 1.30 ± 0.20 | 1.67 ± 0.29 | 1.98 ± 0.32 |
| MRP-4 | 1.00 ± 0.00 | 1.12 ± 0.09 | 1.22 ± 0.03 ***** | 1.29 ± 0.06 |
| MRP-5 | 1.00 ± 0.00 | 0.81 ± 0.16 | 1.19 ± 0.07 | 1.00 ± 0 15 |
| BCRP | 1.00 ± 0.00 | 0.90 ± 0.06 | 0.97 ± 0.09 | 0.90 ± 0.17 |
| Marveld2 (tricellulin) | 1.00 ± 0.00 | 0.90 ± 0.21 | 0.83 ± 0.19 | 0.71 ± 0.16 |
| CAT-1 | 1.00 ± 0.00 | 0.95 ± 0.06 | 2.26 ± 0.38 ***** | 2.39 ± 0.55 **§** |
| CAT-3 | 1.00 ± 0.00 | 1.11 ± 0.05 | 1.24 ± 0.04 ***** | 1.34 ± 0.07 **§** |
| ENT-1 | 1.00 ± 0.00 | 1.05 ± 0.13 | 1.21 ± 0.19 | 1.05 ± 0.15 |
| SELE | 1.00 ± 0.00 (n=2) | 2.60 ± 0.00 (n=1) | 1.01 ± 0.00 (n=1) | 1.33 ± 0.00 (n=1) |
| InR | 1.00 ± 0.00 | 0.93 ± 0.10 | 1.41 ± 0.13 (*) | 1.34 ± 0.19 (**§**) |
| LAT-1 | 1.00 ± 0.00 | 1.27 ± 0.16 | 1.47 ± 0.09 | 1.58 ± 0.22 |
| LRP-1 | 1.00 ± 0.00 | 1.05 ± 0.22 | 1.51 ± 0.17 | 1.36 ± 0.22 |
| LRP-8 | 1.00 ± 0.00 | 0.89 ± 0.13 | 0.72 ± 0.05 (*) | 0.63 ± 0.03 |
| MCT-1 | 1.00 ± 0.00 | 1.25 ± 0.19 | 1.46 ± 0.12 (*) | 1.66 ± 0.21 |
| MCT-8 | 1.00 ± 0.00 | 1.06 ± 0.14 | 1.14 ± 0.15 | 1.09 ± 0.22 |
| SLC1A1 | 1.00 ± 0.00 | n.d. | 0.09 ± 0.05 | n.d. |
| TfR | 1.00 ± 0.00 | 1.00 ± 0.08 | 0.92 ± 0.12 | 0.87 ± 0.14 |
| VEGF-A | 1.00 ± 0.00 | 0.96 ± 0.13 | 16.57 ± 2.58 ***** | 14.49 ± 1.97 **§** |
| WWC2 | 1.00 ± 0.00 | 1.13 ± 0.08 | 1.87 ± 0.24 ***** | 1.77 ± 0.16 **§** |
| CK8 | 1.00 ± 0.00 | 1.12 ± 0.45 | 1.00 ± 0.15 | 1.05 ± 0.17 |
| CK18 | 1.00 ± 0.00 | 1.20 ± 0.32 | 0.91 ± 0.20 | 1.01 ± 0.10 |
| CK19 | 1.00 ± 0.00 | 0.96 ± 0.38 | 1.04 ± 0.17 | 0.88 ± 0.17 |
| AQP1 | 1.00 ± 0.00 | 1.55 ± 0.58 | 0.99 ± 0.29 | 1.00 ± 0.20 |
| AQP2 | 1.00 ± 0.00 | 0.69 ± 0.42 | 2.45 ± 0.55 | 1.18 ± 0.20 |
| AQP3 | 1.00 ± 0.00 | 1.24 ± 0.56 | 1.04 ± 0.22 | 0.88 ± 0.10 |
| AQP4 | 1.00 ± 0.00 | 2.13 ± 1.41 | 3.12 ± 1.10 | 1.61 ± 0.39 |
| AQP5 | 1.00 ± 0.00 | 1.13 ± 0.42 | 1.25 ± 0.28 | 0.90 ± 0.15 |
| AQP6 | 1.00 ± 0.00 | n.d. | 0.87 ± 0.00 (n=1) | n.d. |
| AQP7 | 1.00 ± 0.00 | 0.91 ± 0.26 | 0.64 ± 0 15 | 0.70 ± 0.22 |
| AQP8 | 1.00 ± 0.00 | 0.78 ± 0.00 (n=1) | n.d. | 0.49 ± 0.00 (n=1) |
| AQP9 | 1.00 ± 0.00 | 1.76 ± 0.87 | 1.59 ± 0.28 | 3.74 ± 1.07 |
| AQP10 | 1.00 ± 0.00 | 1.22 ± 0.41 | 0.21 ± 0.03 | 0.15 ± 0.02 |
| AQP11 | 1.00 ± 0.00 | 1.04 ± 0.43 | 0.75 ± 0.15 | 0.73 ± 0.06 |
| MUC1A | 1.00 ± 0.00 | 1.35 ± 0.48 | 1.05 ± 0.20 | 0.81 ± 0.10 |
| MUC1B | 1.00 ± 0.00 | 1.03 ± 0.34 | 1.13 ± 0.22 | 0.81 ± 0.08 |
| MUC18 | 1.00 ± 0.00 | 1.05 ± 0.41 | 1.13 ± 0.14 | 0.98 ± 0.04 |
| MUC20 | 1.00 ± 0.00 | 1.35 ± 0.67 | 1.50 ± 0.21 | 1.23 ± 0.14 |
| e-cadherin | 1.00 ± 0.00 | 1.48 ± 0.69 | 0.83 ± 0.14 | 0.82 ± 0.14 |
| b-catenin tv1-3 | 1.00 ± 0.00 | 1.15 ± 0.42 | 0.71 ± 0.17 | 0.61 ± 0.03 |
| b-catenin tv4 | 1.00 ± 0.00 | 1.23 ± 0.49 | 1.14 ± 0.31 | 0.95 ± 0.20 |
| vimentin1 | 1.00 ± 0.00 | 1.21 ± 0.58 | 1.09 ± 0.09 | 0.84 ± 0.04 |
| Fibronectin | 1.00 ± 0.00 | 1.27 ± 0.49 | 0.94 ± 0.22 | 0.99 ± 0.09 |
| S100A4 tv1 | 1.00 ± 0.00 | 1.50 ± 0.52 | 0.80 ± 0.21 | 1.06 ± 0.21 |
| S100A4 tv2 | 1.00 ± 0.00 | 3.07 ± 1.42 | 0.79 ± 0.24 | 1.17 ± 0.42 |
| MFSD2A | 1.00 ± 0.00 | 0.33 ± 0.12 | 0.70 ± 0.41 | 0.61 ± 0.20 |
| RAGE | 1.00 ± 0.00 | 1.23 ± 0.37 | 1.51 ± 0.38 | 1.20 ± 0.24 |

Supplementary table 6: Average values of mRNA expression levels in BCELC after 7h OGD in mono- or co-culture with the rat glioma C6 cells in comparison to the average values of mRNA expression of BCELC in mono-culture after 7h under normoxic conditions. Normalized to endogenous control PPIA. Values are given as x-fold ± SEM. N=4, n=1-4, two-way ANOVA with all pairwise multiple comparison Holm-Sidak in case of non-normality distribution or non-equal variances, p-value=0.05, * significant against normoxia mono, § significant against normoxia C6, # significant against OGD mono. () indicates a trending regulation. For trending regulations: p< 0.075; n.d. not detectable; (n=1) indicates targets that were detect in only one sample

|  | Normoxia mono 7h | Normoxia C6  7h | OGD mono  7h | OGD C6  7h |
| --- | --- | --- | --- | --- |
| PPIA | 1.00 ± 0.00 | 1.00 ± 0.00 | 1.00 ± 0.00 | 1.00 ± 0.00 |
| b-actin | 1.00 ± 0.00 | 1.08 ± 0.15 | 1.93 ± 0.33 | 1.56 ± 0.10 |
| GADPH | 1.00 ± 0.00 | 1.16 ± 0.12 | 1.60 ± 0.09 | 1.43 ± 0.05 |
| B2M | 1.00 ± 0.00 | 1.24 ± 0.18 | 1.83 ± 0.14 | 1.69 ± 0.09 |
| CLDN-1 | 1.00 ± 0.00 | 0.91 ± 0.17 | 0.95 ± 0.06 | 0.98 ± 0.26 |
| CLDN-2 | 1.00 ± 0.00 | 2.00 ± 1.04 | 2.24 ± 0.22 | 1.48 ± 0.34 |
| CLDN-3 | 1.00 ± 0.00 | 1.56 ± 0.22 | 0.79 ± 0.11 | 0.74 ± 0.07 **§** |
| CLDN-4 | 1.00 ± 0.00 | 1.15 ± 0.05 | 1.00 ± 0.10 | 0.89 ± 0.07 |
| CLDN-5 | 1.00 ± 0.00 | 1.35 ± 0.18 | 2.59 ± 0.81 | 2.72 ± 0.79 |
| CLDN-6 | 1.00 ± 0.00 | 1.03 ± 0.04 | 1.41 ± 0.24 | 1.25 ± 0.12 |
| CLDN-7 | 1.00 ± 0.00 | 1.64 ± 0.22 | 1.32 ± 0.23 | 1.38 ± 0.13 |
| CLDN-8 | 1.00 ± 0.00 | 2.10 ± 0.28 | 1.56 ± 0.43 | 1.81 ± 0.55 |
| CLDN-9 | 1.00 ± 0.00 | 1.06 ± 0.10 | 0.68 ± 0.15 | 0.58 ± 0.18 |
| CLDN-10 tva | 1.00 ± 0.00 | 1.49 ± 0.15 | 1.87 ± 0.12 | 2.17 ± 0.07 |
| CLDN-10 tvb | 1.00 ± 0.00 | 1.34 ± 0.13 | 2.09 ± 0.10 ***** | 2.65 ± 0.22 **§** |
| CLDN-11 | 1.00 ± 0.00 | 1.30 ± 0.19 | 2.00 ± 0.37 | 1.95 ± 0.28 |
| CLDN-12 tv1 | 1.00 ± 0.00 | 1.12 ± 0.11 | 0.81 ± 0.12 | 0.70 ± 0.19 |
| CLDN-12 tv2 | 1.00 ± 0.00 | 1.20 ± 0.13 | 1.53 ± 0.03 ***** | 1.47 ± 0.17 |
| CLDN-12 tv3 | 1.00 ± 0.00 | 1.40 ± 0.07 | 1.46 ± 0.11 ***** | 1.50 ± 0.06 |
| CLDN-14 | 1.00 ± 0.00 | 0.45 ± 0.00 (n=1) | 0.89 ± 0.29 | 0.56 ± 0.22 |
| CLDN-15 | 1.00 ± 0.00 | 1.17 ± 0.19 | 0.93 ± 0.13 | 1.02 ± 0.08 |
| CLDN-16 | 1.00 ± 0.00 | 0.90 ± 0.27 | 1.23 ± 0.39 | 0.85 ± 0.20 |
| CLDN-17 | 1.00 ± 0.00 | 1.27 ± 0.24 | 1.99 ± 0.37 | 1.60 ± 0.31 |
| CLDN-18 | 1.00 ± 0.00 | 2.84 ± 0.81 | 3.46 ± 1.03 | 2.73 ± 0.37 |
| CLDN-19 | 1.00 ± 0.00 | 1.57 ± 0.33 | 0.96 ± 0.37 | 0.99 ± 0.20 |
| CLDN-20 | 1.00 ± 0.00 | 6.82 ± 0.00 (n=1) | n.d. | 1.23 ± 0.27 |
| CLDN-21 | 1.00 ± 0.00 | 0.99 ± 0.30 | 1.33 ± 0.57 | 2.44 ± 1.62 |
| CLDN-22 | 1.00 ± 0.00 | 1.55 ± 0.17 | 0.82 ± 0.08 | 0.88 ± 0.15 **§** |
| CLDN-23 | 1.00 ± 0.00 | 0.82 ± 0.18 | 0.47 ± 0.06 | 0.77 ± 0.02 |
| CLDN-24 | 1.00 ± 0.00 | 2.29 ± 0.70 | 1.59 ± 0.17 | 1.09 ± 0.42 |
| CLDN-25 | 1.00 ± 0.00 | 0.84 ± 0.03 | 1.52 ± 0.32 | 1.05 ± 0.13 |
| CLDN-25 tv7 | 1.00 ± 0.00 | 1.28 ± 0.20 | 3.94 ± 1.07 | 2.15 ± 0.38 |
| CLDN-27 | 1.00 ± 0.00 | 1.60 ± 0.77 | 0.96 ± 0.02 | 0.82 ± 0.09 |
| JAM-1 | 1.00 ± 0.00 | 1.28 ± 0.18 | 1.04 ± 0.07 | 1.18 ± 0.07 |
| JAM-2 | 1.00 ± 0.00 | 1.43 ± 0.18 | 1.57 ± 0.17 | 1.20 ± 0.10 |
| JAM-3 | 1.00 ± 0.00 | 1.44 ± 0.11 | 1.03 ± 0.15 | 1.32 ± 0.12 |
| ZO-1 | 1.00 ± 0.00 | 1.20 ± 0.09 | 1.53 ± 0.19 ***** | 1.25 ± 0.16 |
| ZO-2 | 1.00 ± 0.00 | 1.27 ± 0.30 | 1.93 ± 0.14 ***** | 1.73 ± 0.08 |
| ZO-3 | 1.00 ± 0.00 | 1.32 ± 0.10 | 0.96 ± 0.04 | 0.94 ± 0.13 |
| vWF | 1.00 ± 0.00 | 1.04 ± 0.06 | 0.91 ± 0.12 | 0.91 ± 0.11 |
| GLUT-1 | 1.00 ± 0.00 | 1.05 ± 0.17 | 6.48 ± 2.24 ***** | 5.20 ± 1.74 (**§**) |
| Occludin | 1.00 ± 0.00 | 1.00 ± 0.13 | 1.78 ± 0.03 ***** | 1.29 ± 0.10 (**§**) |
| CDH5 | 1.00 ± 0.00 | 1.26 ± 0.22 | 3.47 ± 0.50 | 3.07 ± 0.35 |
| ABCB1 | 1.00 ± 0.00 | 0.99 ± 0.25 | 2.14 ± 0.52 | 2.27 ± 0.52 |
| MRP-1 | 1.00 ± 0.00 | 1.13 ± 0.27 | 1.58 ± 0.06 | 1.55 ± 0.20 |
| MRP-2 | 1.00 ± 0.00 | 1.00 ± 0.22 | 1.92 ± 0.62 | 1.38 ± 0.22 |
| MRP-3 | 1.00 ± 0.00 | 1.34 ± 0.21 | 1.18 ± 0.27 | 1.16 ± 0.21 |
| MRP-4 | 1.00 ± 0.00 | 1.31 ± 0.09 | 1.43 ± 0.20 ***** | 1.38 ± 0.14 |
| MRP-5 | 1.00 ± 0.00 | 1.01 ± 0.20 | 1.12 ± 0.09 | 1.26 ± 0.06 |
| BCRP | 1.00 ± 0.00 | 1.02 ± 0.12 | 1.25 ± 0.17 | 1.34 ± 0.05 |
| Marveld2 (tricellulin) | 1.00 ± 0.00 | 1.13 ± 0.20 | 1.23 ± 0.23 | 1.26 ± 0.37 |
| CAT-1 | 1.00 ± 0.00 | 1.06 ± 0.16 | 2.10 ± 0.19 ***** | 2.15 ± 0.22 **§** |
| CAT-3 | 1.00 ± 0.00 | 1.10 ± 0.14 | 1.24 ± 0.11 | 1.36 ± 0.14 |
| ENT-1 | 1.00 ± 0.00 | 1.19 ± 0.06 | 1.33 ± 0.08 (*) | 1.54 ± 0.14 (**§**) |
| SELE | 1.00 ± 0.00 (n=2) | 3.36 ± 0.00 (n=1) | 0.44 ± 0.00 (n=1) | n.d. |
| InR | 1.00 ± 0.00 | 1.28 ± 0.17 | 1.59 ± 0.08 ***** | 1.57 ± 0.06 |
| LAT-1 | 1.00 ± 0.00 | 1.28 ± 0.18 | 1.16 ± 0.23 | 1.02 ± 0.15 |
| LRP-1 | 1.00 ± 0.00 | 1.18 ± 0.16 | 1.68 ± 0.12 (*) | 1.65 ± 0.12 |
| LRP-8 | 1.00 ± 0.00 | 0.92 ± 0.18 | 0.73 ± 0.11 | 0.74 ± 0.11 |
| MCT-1 | 1.00 ± 0.00 | 1.28 ± 0.18 | 1.44 ± 0.27 | 1.56 ± 0.19 |
| MCT-8 | 1.00 ± 0.00 | 1.24 ± 0.19 | 1.21 ± 0.03 | 1.28 ± 0.17 |
| SLC1A1 | 1.00 ± 0.00 | 0.20 ± 0.00  (n=1) | 195.87 ± 0.00 (n=1) | n.d. |
| TfR | 1.00 ± 0.00 | 1.20 ± 0.08 | 1.12 ± 0.10 | 1.18 ± 0.11 |
| VEGF-A | 1.00 ± 0.00 | 1.31 ± 0.31 | 19.28 ± 7.44 (*) | 20.74 ± 9.13 (**§**) |
| WWC2 | 1.00 ± 0.00 | 1.17 ± 0.09 | 1.51 ± 0.12 ***** | 1.54 ± 0.06 **§** |
| CK8 | 1.00 ± 0.00 | 0.94 ± 0.16 | 1.11 ± 0.24 | 1.24 ± 0.14 |
| CK18 | 1.00 ± 0.00 | 1.14 ± 0.10 | 1.12 ± 0.14 | 1.49 ± 0.25 |
| CK19 | 1.00 ± 0.00 | 0.90 ± 0.20 | 1.23 ± 0.15 | 1.04 ± 0.20 |
| AQP1 | 1.00 ± 0.00 | 1.13 ± 0.18 | 1.31 ± 0.83 | 1.13 ± 0.37 |
| AQP2 | 1.00 ± 0.00 | 0.55 ± 0.16 | 0.60 ± 0.29 | 1.32 ± 0.50 |
| AQP3 | 1.00 ± 0.00 | 0.74 ± 0.24 | 0.97 ± 0.30 | 1.32 ± 0.17 |
| AQP4 | 1.00 ± 0.00 | 0.99 ± 0.24 | 1.42 ± 0.16 | 1.63 ± 0.17 |
| AQP5 | 1.00 ± 0.00 | 1.38 ± 0.12 | 0.81 ± 0.09 | 0.74 ± 0.14 |
| AQP6 | 1.00 ± 0.00 (n=1) | 4.17 ± 0.00 (n=1) | 1.99 ± 0.00 (n=1) | n.d. |
| AQP7 | 1.00 ± 0.00 | 1.90 ± 0.19 | 0.81 ± 0.24 | 0.78 ± 0.26 **§** |
| AQP8 | 1.00 ± 0.00 (n=2) | n.d. | n.d. | 0.64 ± 0.00 (n=1) |
| AQP9 | 1.00 ± 0.00 | 1.98 ± 0.08 | 2.63 ± 0.36 (*) | 2.85 ± 0.85 |
| AQP10 | 1.00 ± 0.00 | 1.29 ± 0.29 | 0.58 ± 0.27 | 0.73 ± 0.49 |
| AQP11 | 1.00 ± 0.00 | 0.96 ± 0.12 | 0.99 ± 0.14 | 1.08 ± 0.11 |
| MUC1A | 1.00 ± 0.00 | 1.13 ± 0.10 | 1.12 ± 0.20 | 1.13 ± 0.18 |
| MUC1B | 1.00 ± 0.00 | 1.13 ± 0.11 | 1.30 ± 0.26 | 1.26 ± 0.13 |
| MUC18 | 1.00 ± 0.00 | 1.06 ± 0.11 | 1.82 ± 0.71 | 1.48 ± 0.42 |
| MUC20 | 1.00 ± 0.00 | 1.01 ± 0.21 | 1.34 ± 0.35 | 1.24 ± 0.25 |
| e-cadherin | 1.00 ± 0.00 | 1.14 ± 0.14 | 1.05 ± 0.25 | 1.24 ± 0.34 |
| b-catenin tv1-3 | 1.00 ± 0.00 | 1.14 ± 0.18 | 1.06 ± 0.33 | 1.23 ± 0.34 |
| b-catenin tv4 | 1.00 ± 0.00 | 0.95 ± 0.24 | 0.91 ± 0.21 | 0.97 ± 0.32 |
| vimentin1 | 1.00 ± 0.00 | 1.12 ± 0.18 | 1.28 ± 0.32 | 1.08 ± 0.15 |
| Fibronectin | 1.00 ± 0.00 | 1.23 ± 0.15 | 1.12 ± 0.30 | 1.44 ± 0.29 |
| S100A4 tv1 | 1.00 ± 0.00 | 1.45 ± 0.31 | 0.98 ± 0.21 | 1.59 ± 0.53 |
| S100A4 tv2 | 1.00 ± 0.00 | 2.12 ± 0.66 | 0.79 ± 0.17 | 1.60 ± 0.70 |
| MFSD2A | 1.00 ± 0.00 | 0.35 ± 0.05 | n.d. | n.d. |
| RAGE | 1.00 ± 0.00 | 1.19 ± 0.20 | 1.83 ± 0.52 | 1.31 ± 0.13 |

Supplementary table 7: Average values of mRNA expression levels in BCELC after 9h OGD in mono- or co-culture with the rat glioma C6 cells in comparison to the average values of mRNA expression of BCELC in mono-culture after 9h under normoxic conditions. Normalized to endogenous control PPIA. Values are given as x-fold ± SEM. N=4, n=1-4, two-way ANOVA with all pairwise multiple comparison Holm-Sidak in case of non-normality distribution or non-equal variances, p-value=0.05, * significant against normoxia mono, § significant against normoxia C6, # significant against OGD mono. () indicates a trending regulation. For trending regulations: p< 0.075; n.d. not detectable; (n=1) indicates targets that were detect in only one sample

|  | Normoxia mono 9h | Normoxia C6  9h | OGD mono  9h | OGD C6  9h |
| --- | --- | --- | --- | --- |
| PPIA | 1.00 ± 0.00 | 1.00 ± 0.00 | 1.00 ± 0.00 | 1.00 ± 0.00 |
| b-actin | 1.00 ± 0.00 | 0.14 ± 0.04 | 2.94 ± 1.99 | 0.34 ± 0.11 |
| GADPH | 1.00 ± 0.00 | 0.30 ± 0.03 | 0.54 ± 0.13 | 0.44 ± 0.08 |
| B2M | 1.00 ± 0.00 | 0.15 ± 0.01 | 1.51 ± 0.95 | 0.24 ± 0.07 |
| CLDN-1 | 1.00 ± 0.00 | 3.21 ± 1.34 | 2.32± 0.95 | 8.39 ± 4.12 |
| CLDN-2 | 1.00 ± 0.00 | 0.11 ± 0.02 | 0.59 ± 0.10 | 0.36 ± 0.14 |
| CLDN-3 | 1.00 ± 0.00 | 5.09 ± 0.52 ***** | 2.00 ± 0.54 | 2.10 ± 0.39 **§** |
| CLDN-4 | 1.00 ± 0.00 | 1.04 ± 0.01 | 0.81 ± 0.23 | 0.68 ± 0.03 |
| CLDN-5 | 1.00 ± 0.00 | 0.28 ± 0.07 | 2.36 ± 0.87 | 1.77 ± 0.56 |
| CLDN-6 | 1.00 ± 0.00 | 0.23 ± 0.03 ***** | 0.55 ± 0.12 ***** | 0.27 ± 0.03 |
| CLDN-7 | 1.00 ± 0.00 | 2.42 ± 0.26 | 1.61 ± 0.75 | 1.77 ± 0.17 |
| CLDN-8 | 1.00 ± 0.00 | 1.08 ± 0.08 | 0.70 ± 0.34 | 0.83 ± 0.05 |
| CLDN-9 | 1.00 ± 0.00 | 0.80 ± 0.20 | 1.73 ± 1.09 | 1.56 ± 0.32 |
| CLDN-10tva | 1.00 ± 0.00 | 0.39 ± 0.04 | 1.86 ± 0.26 | 2.10 ± 0.47 |
| CLDN-10tvb | 1.00 ± 0.00 | 0.60 ± 0.03 | 1.39 ± 0.57 | 1.57 ± 0.11 |
| CLDN-11 | 1.00 ± 0.00 | 0.23 ± 0.01 | 0.89 ± 0.05 | 0.70 ± 0.20 |
| CLDN-12 tv1 | 1.00 ± 0.00 | 0.20 ± 0.03 ***** | 0.11 ± 0.04 ***** | 0.12 ± 0.03 |
| CLDN-12 tv2 | 1.00 ± 0.00 | 0.50 ± 0.03 | 0.49 ± 0.16 | 0.43 ± 0.05 |
| CLDN-12 tv3 | 1.00 ± 0.00 | 0.29 ± 0.03 (*) | 0.72 ± 0.19 | 0.28 ± 0.06 |
| CLDN-14 | 1.00 ± 0.00 (n=1) | n.d. | 0.71 ± 0.00 (n=1) | 1.19 ± 0.00 (n=1) |
| CLDN-15 | 1.00 ± 0.00 | 0.28 ± 0.02 ***** | 0.11 ± 0.04 ***** | 0.09 ± 0.02 |
| CLDN-16 | 1.00 ± 0.00 | 0.37 ± 0.02 ***** | 0.22 ± 0.02 ***** | 0.35 ± 0.09 |
| CLDN-17 | 1.00 ± 0.00 | 0.25 ± 0.02 | 0.87 ± 0.38 | 0.73 ± 0.09 |
| CLDN-18 | 1.00 ± 0.00 | 0.15 ± 0.03 ***** | 0.44 ± 0.12 ***** | 0.34 ± 0.06 |
| CLDN-19 | 1.00 ± 0.00 | 11.15 ± 0.38 | 6.28 ± 2.44 | 5.60 ± 1.34 |
| CLDN-20 | 1.00 ± 0.00 (n=1) | 0.83 ± 0.00 (n=1) | 0.83 ± 0.00 (n=1) | 1.01 ± 0.00 (n=1) |
| CLDN-21 | 1.00 ± 0.00 | 2.44 ± 0.00 (n=1) | 11.95 ± 5.77 | 9.61 ± 0.65 |
| CLDN-22 | 1.00 ± 0.00 | 30.36 ± 0.58 | 26.98 ± 0.61 | 28.60 ± 4.73 |
| CLDN-23 | 1.00 ± 0.00 | 0.28 ± 0.10 ***** | 0.19 ± 0.08 ***** | 0.29 ± 0.12 |
| CLDN-24 | 1.00 ± 0.00 | 3.60 ± 0.78 | 3.18 ± 0.26 | 2.35 ± 0.37 |
| CLDN-25 | 1.00 ± 0.00 | 0.23 ± 0.04 | 3.12 ± 2.12 | 0.32 ± 0.12 |
| CLDN-25 tv7 | 1.00 ± 0.00 | 0.33 ± 0.03 | 6.95 ± 5.05 | 0.44 ± 0.08 |
| CLDN-27 | 1.00 ± 0.00 | 0.05 ± 0.00 (n=1) | 4.90 ± 3.02 | 2.94 ± 0.98 |
| JAM-1 | 1.00 ± 0.00 | 2.09 ± 0.16 | 1.33 ± 0.52 | 1.37 ± 0.31 |
| JAM-2 | 1.00 ± 0.00 | 1.23 ± 0.08 | 1.51 ± 0.15 (*) | 0.76 ± 0.01 **#** |
| JAM-3 | 1.00 ± 0.00 | 2.03 ± 0.10 | 1.55 ± 0.62 | 1.54 ± 0.09 |
| ZO-1 | 1.00 ± 0.00 | 1.46 ± 0.17 | 6.47 ± 3.09 | 1.91 ± 0.08 |
| ZO-2 | 1.00 ± 0.00 | 0.20 ± 0.03 ***** | 0.71 ± 0.26 | 0.22 ± 0.02 |
| ZO-3 | 1.00 ± 0.00 | 1.20 ± 0.04 | 0.98 ± 0.37 | 0.86 ± 0.05 |
| vWF | 1.00 ± 0.00 | 0.64 ± 0.12 | 0.42 ± 0.03 ***** | 0.27 ± 0.02 (§) |
| GLUT-1 | 1.00 ± 0.00 | 0.70 ± 0.07 | 10.88 ± 4.14 ***** | 2.60 ± 0.25 **#** |
| Occludin | 1.00 ± 0.00 | 0.51 ± 0.12 | 2.13 ± 0.98 | 0.84 ± 0.20 |
| CDH5 | 1.00 ± 0.00 | 0.32 ± 0.03 | 4.87 ± 2.85 | 0.94 ± 0.18 |
| ABCB1 | 1.00 ± 0.00 | 0.28 ± 0.06 | 1.25 ± 0.29 | 0.59 ± 0.06 (#) |
| MRP-1 | 1.00 ± 0.00 | 0.12 ± 0.02 ***** | 0.20 ± 0.04 ***** | 0.16 ± 0.03 |
| MRP-2 | 1.00 ± 0.00 | 0.47 ± 0.002***** | 0.82 ± 0.03 | 0.44 ± 0.06 |
| MRP-3 | 1.00 ± 0.00 | 1.44 ± 0.51 | 2.68 ± 0.52 ***** | 1.82 ± 0.28 |
| MRP-4 | 1.00 ± 0.00 | 1.20 ± 0.07 | 1.89 ± 0.80 | 1.79 ± 0.17 |
| MRP-5 | 1.00 ± 0.00 | 0.16 ± 0.02 ***** | 0.19 ± 0.06 ***** | 0.17 ± 0.04 |
| BCRP | 1.00 ± 0.00 | 0.76 ± 0.03 | 0.58 ± 0.13 (*) | 0.43 ± 0.02 |
| Marveld2 (tricellulin) | 1.00 ± 0.00 | 0.10 ± 0.02 | 1.21 ± 0.87 | 0.11 ± 0.03 |
| CAT-1 | 1.00 ± 0.00 | 0.53 ± 0.06 | 1.56 ± 0.50 | 1.23 ± 0.21 |
| CAT-3 | 1.00 ± 0.00 | 0.84 ± 0.03 | 1.55 ± 0.21 | 1.42 ± 0.19 |
| ENT-1 | 1.00 ± 0.00 | 0.48 ± 0.02 | 0.71 ± 0.16 | 0.61 ± 0.07 |
| SELE | 1.00 ± 0.00 (n=1) | n.d. | n.d. | 0.47 ± 0.00 (n=1) |
| InR | 1.00 ± 0.00 | 0.45 ± 0.08 | 0.63 ± 0.10 | 0.44 ± 0.05 |
| LAT-1 | 1.00 ± 0.00 | 4.38 ± 0.60 | 3.59 ± 1.16 | 5.31 ± 1.59 |
| LRP-1 | 1.00 ± 0.00 | 0.26 ± 0.08 (*) | 0.71 ± 0.17 | 0.30 ± 0.03 |
| LRP-8 | 1.00 ± 0.00 | 0.32 ± 0.03 | 0.44 ± 0.21 | 0.49 ± 0.05 |
| MCT-1 | 1.00 ± 0.00 | 5.90 ± 1.68 | 5.28 ± 1.89 | 6.64 ± 2.03 |
| MCT-8 | 1.00 ± 0.00 | 0.45 ± 0.07 | 0.51 ± 0.10 | 0.37 ± 0.03 |
| SLC1A1 | 1.00 ± 0.00  (n=1) | n.d. | 652.18 ± 0.00 (n=1) | 0.01 ± 0.00  (n=1) |
| TfR | 1.00 ± 0.00 | 1.00 ± 0.02 | 1.27 ± 0.39 | 1.01 ± 0.26 |
| VEGF-A | 1.00 ± 0.00 | 0.16 ± 0.02 | 11.65 ± 1.80 ***** | 6.07 ± 1.13 |
| WWC2 | 1.00 ± 0.00 | 1.36 ± 0.01 | 1.47 ± 0.52 | 1.35 ± 0.14 |
| CK8 | 1.00 ± 0.00 | 0.17 ± 0.12 | 3.02 ± 1.90 | 0.49 ± 0.14 |
| CK18 | 1.00 ± 0.00 | 0.14 ± 0.10 | 3.73 ± 2.48 | 0.37 ± 0.12 |
| CK19 | 1.00 ± 0.00 | 0.13 ± 0.09 | 3.91 ± 2.61 | 0.36 ± 0.09 |
| AQP1 | 1.00 ± 0.00 | 0.12 ± 0.08 | 1.65 ± 0.81 | 0.41 ± 0.20 |
| AQP2 | 1.00 ± 0.00 | 0.04 ± 0.00 (n=1) | 2.62 ± 1.54 | 0.25 ± 0.13 |
| AQP3 | 1.00 ± 0.00 | 0.08 ± 0.00 (n=1) | 2.96 ± 1.20 | 0.18 ± 0.02 |
| AQP4 | 1.00 ± 0.00 | 0.16 ± 0.07 | 3.48 ± 2.19 | 0.44 ± 0.09 |
| AQP5 | 1.00 ± 0.00 | 0.08 ± 0.06 | 2.04 ± 1.36 | 0.21 ± 0.08 |
| AQP6 | 1.00 ± 0.00 | n.d. | 2.55 ± 1.43 | n.d. |
| AQP7 | 1.00 ± 0.00 | 0.16 ± 0.00 (n=1) | 1.52 ± 0.96 | 0.32 ± 0.12 |
| AQP8 | 1.00 ± 0.00 (n=1) | n.d. | 0.35 ± 0.00 (n=1) | 0.36 ± 0.00 (n=1) |
| AQP9 | 1.00 ± 0.00 | 0.48 ± 0.00 (n=1) | 12.50 ± 9.09 | 0.61 ± 0.18 |
| AQP10 | 1.00 ± 0.00 | 0.12 ± 0.08 | 0.42 ± 0.28 | 0.04 ± 0.01 |
| AQP11 | 1.00 ± 0.00 | 0.12 ± 0.08 | 3.22 ± 2.11 | 0.30 ± 0.11 |
| MUC1A | 1.00 ± 0.00 | 0.11 ± 0.08 | 1.91 ± 1.18 | 0.24 ± 0.08 |
| MUC1B | 1.00 ± 0.00 | 0.11 ± 0.08 | 1.86 ± 1.09 | 0.27 ± 0.10 |
| MUC18 | 1.00 ± 0.00 | 0.12 ± 0.09 | 3.19 ± 1.99 | 0.49 ± 0.09 |
| MUC20 | 1.00 ± 0.00 | 0.18 ± 0.12 | 4.32 ± 2.72 | 0.63 ± 0.14 |
| e-cadherin | 1.00 ± 0.00 | 0.16 ± 0.11 | 2.18 ± 1.36 | 0.27 ± 0.11 |
| b-catenin tv1-3 | 1.00 ± 0.00 | 0.16 ± 0.11 | 2.12 ± 1.32 | 0.22 ± 0.07 |
| b-catenin tv4 | 1.00 ± 0.00 | 0.14 ± 0.10 | 3.38 ± 2.19 | 0.29 ± 0.10 |
| vimentin1 | 1.00 ± 0.00 | 0.14 ± 0.08 | 2.27 ± 1.34 | 0.42 ± 0.12 |
| Fibronectin | 1.00 ± 0.00 | 0.17 ± 0.12 | 3.49 ± 2.29 | 0.31 ± 0.11 |
| S100A4 tv1 | 1.00 ± 0.00 | 0.13 ± 0.09 | 2.17 ± 1.27 | 0.42 ± 0.21 |
| S100A4 tv2 | 1.00 ± 0.00 | 0.17 ± 0.12 | 1.28 ± 0.75 | 0.24 ± 0.12 |
| MFSD2A | 1.00 ± 0.00 | 0.44 ± 0.17 | 14.61 ± 8.73 | 3.65 ± 1.95 |
| RAGE | 1.00 ± 0.00 | 0.21 ± 0.04 | 3.10 ± 2.14 | 0.24 ± 0.06 |

Supplementary table 8: Average values of mRNA expression levels in BCELC after 17h OGD in mono- or co-culture with the rat glioma C6 cells in comparison to the average values of mRNA expression of BCELC in mono-culture after 17h under normoxic conditions. Normalized to endogenous control PPIA. Values are given as x-fold ± SEM. N=4, n=1-4, two-way ANOVA with all pairwise multiple comparison Holm-Sidak in case of non-normality distribution or non-equal variances, p-value=0.05, * significant against normoxia mono, § significant against normoxia C6, # significant against OGD mono. () indicates a trending regulation. For trending regulations: p< 0.075; n.d. not detectable; (n=1) indicates targets that were detect in only one sample

|  | Normoxia mono 17h | Normoxia C6  17h | OGD mono  17h | OGD C6  17h |
| --- | --- | --- | --- | --- |
| PPIA | 1.00 ± 0.00 | 1.00 ± 0.00 | 1.00 ± 0.00 | 1.00 ± 0.00 |
| b-actin | 1.00 ± 0.00 | 1.36 ± 0.22 | 4.80 ± 2.02 | 2.47 ±0.22 |
| GADPH | 1.00 ± 0.00 | 1.33 ± 0.09 | 1.59 ± 0.27 | 2.05 ±0.26 |
| B2M | 1.00 ± 0.00 | 1.40 ± 0.16 | 1.82 ± 0.55 | 2.53 ±0.43 |
| CLDN-1 | 1.00 ± 0.00 | 0.84 ± 0.07 | 1.10 ± 0.53 | 1.72 ±0.67 |
| CLDN-2 | 1.00 ± 0.00 | 2.01 ± 0.67 | 1.43 ± 0.60 | 11.16 ±2.12 **§#** |
| CLDN-3 | 1.00 ± 0.00 | 1.15 ± 0.10 | 0.53 ± 0.13 | 0.40 ±0.08 **§** |
| CLDN-4 | 1.00 ± 0.00 | 1.10 ± 0.06 | 0.74 ± 0.17 | 0.92 ±0.08 |
| CLDN-5 | 1.00 ± 0.00 | 1.35 ± 0.14 | 4.34 ± 1.60 | 15.90 ±3.75 **§(#)** |
| CLDN-6 | 1.00 ± 0.00 | 1.56 ± 0.23 ***** | 0.85 ± 0.11 | 1.11 ±0.31 **(§)** |
| CLDN-7 | 1.00 ± 0.00 | 1.10 ± 0.07 | 0.43 ± 0.11 ***** | 0.65 ±0.08 **§** |
| CLDN-8 | 1.00 ± 0.00 | 1.48 ± 0.12 | 0.12 ± 0.03 **(*)** | 0.67 ±0.14 **§** |
| CLDN-9 | 1.00 ± 0.00 | 0.91 ± 0.05 | 0.94 ± 0.40 | 1.19 ±0.37 |
| CLDN-10tva | 1.00 ± 0.00 | 1.30 ± 0.37 | 2.99 ± 1.20 | 40.21 ±13.79 |
| CLDN-10tvb | 1.00 ± 0.00 | 1.34 ± 0.05 | 2.02 ± 0.42 | 4.12 ±0.35 **§#** |
| CLDN-11 | 1.00 ± 0.00 | 1.45 ± 0.25 | 1.44 ± 0.34 | 5.05 ±0.79 **§#** |
| CLDN-12 tv1 | 1.00 ± 0.00 | 1.32 ± 0.15 | 0.35 ± 0.11 ***** | 1.01 ±0.13 **(#)(§)** |
| CLDN-12 tv2 | 1.00 ± 0.00 | 1.20 ± 0.04 | 0.67 ± 0.19 | 1.20 ±0.02 **#** |
| CLDN-12 tv3 | 1.00 ± 0.00 | 1.16 ± 0.07 | 0.77 ± 0.12 **(*)** | 1.14 ±0.11 |
| CLDN-14 | 1.00 ± 0.00 | 0.59 ± 0.03 | 4.50 ± 1.23 | 5.66 ±0.00 (n=1) |
| CLDN-15 | 1.00 ± 0.00 | 1.27 ± 0.10 | 0.45 ± 0.12 | 0.67 ±0.22 **§** |
| CLDN-16 | 1.00 ± 0.00 | 2.24 ± 0.43 | 1.15 ± 0.75 | 1.43 ±0.40 |
| CLDN-17 | 1.00 ± 0.00 | 1.70 ± 0.17 | 1.32 ± 0.29 | 17.85 ±2.69 **§#** |
| CLDN-18 | 1.00 ± 0.00 | 1.57 ± 0.19 | 1.82 ± 0.34 | 10.82 ±0.92 **§#** |
| CLDN-19 | 1.00 ± 0.00 | 1.32 ± 0.23 | 0.38 ± 0.11 | 0.16 ±0.05 **§** |
| CLDN-20 | 1.00 ± 0.00 (n=1) | 6.32 ± 0.00 (n=1) | n.d. | n.d. |
| CLDN-21 | 1.00 ± 0.00 | 2.26 ± 1.16 | 4.27 ± 0.66 | 55.57 ± 25.03 |
| CLDN-22 | 1.00 ± 0.00 | 1.65 ± 0.50 | 1.69 ± 1.01 | 2.28 ±1.05 |
| CLDN-23 | 1.00 ± 0.00 | 1.39 ± 0.22 | 0.55 ± 0.10 | 0.85 ±0.16 **§** |
| CLDN-24 | 1.00 ± 0.00 | 1.24 ± 0.38 | 3.24 ± 1.61 | 2.68 ±0.94 |
| CLDN-25 | 1.00 ± 0.00 | 1.32 ± 0.07 | 8.68 ± 3.61 | 1.50 ± 0.32 |
| CLDN-25 tv7 | 1.00 ± 0.00 | 2.15 ± 0.11 | 10.13 ± 4.44 | 2.11 ± 0.59 |
| CLDN-27 | 1.00 ± 0.00 | 7.89 ± 0.00 (n=1) | 4.79 ± 2.40 | 43.68 ± 4.77 |
| JAM-1 | 1.00 ± 0.00 | 1.10 ± 0.11 | 0.53 ± 0.12 **(*)** | 0.69 ± 0.03 |
| JAM-2 | 1.00 ± 0.00 | 1.28 ± 0.20 | 1.44 ± 0.05 | 2.12 ± 0.15 **§#** |
| JAM-3 | 1.00 ± 0.00 | 1.00 ± 0.08 | 0.74 ± 0.25 | 0.94 ± 0.10 |
| ZO-1 | 1.00 ± 0.00 | 0.97 ± 0.07 | 1.14 ± 0.08 | 0.97 ± 0.20 |
| ZO-2 | 1.00 ± 0.00 | 1.29 ± 0.12 | 1.03 ± 0.06 | 2.16 ± 0.26 **#** |
| ZO-3 | 1.00 ± 0.00 | 1.16 ± 0.05 | 0.57 ± 0.16 ***** | 0.82 ± 0.08 **(§)** |
| vWF | 1.00 ± 0.00 | 0.98 ± 0.15 | 0.12 ± 0.02 ***** | 0.16 ± 0.02 **§** |
| GLUT-1 | 1.00 ± 0.00 | 1.41 ± 0.09 | 8.76 ± 1.55 ***** | 5.80 ± 0.87 **§** |
| Occludin | 1.00 ± 0.00 | 0.79 ± 0.11 | 1.90 ± 0.54 | 0.77 ± 0.19 |
| CDH5 | 1.00 ± 0.00 | 1.71 ± 0.12 | 6.21 ± 2.84 | 10.45 ± 1.91 **(§)** |
| ABCB1 | 1.00 ± 0.00 | 1.00 ± 0.10 | 0.77 ± 0.17 | 1.54 ± 0.33 |
| MRP-1 | 1.00 ± 0.00 | 1.55 ± 0.24 | 1.22 ± 0.13 | 3.30 ± 0.62 **#** |
| MRP-2 | 1.00 ± 0.00 | 0.93 ± 0.07 | 1.66 ± 0.45 | 3.00 ± 0.14 **§** |
| MRP-3 | 1.00 ± 0.00 | 1.63 ± 0.14 | 1.38 ± 0.43 | 2.58 ± 0.55 |
| MRP-4 | 1.00 ± 0.00 | 1.26 ± 0.12 | 1.41 ± 0.18 | 3.23 ± 0.59 **§#** |
| MRP-5 | 1.00 ± 0.00 | 1.45 ± 0.16 | 0.69 ± 0.08 | 1.53 ± 0.52 |
| BCRP | 1.00 ± 0.00 | 0.95 ± 0.09 | 0.49 ± 0.07 ***** | 0.49 ± 0.05 **§** |
| Marveld2 (tricellulin) | 1.00 ± 0.00 | 1.36 ± 0.12 | 1.41 ± 0.63 | 1.69 ± 0.35 |
| CAT-1 | 1.00 ± 0.00 | 1.12 ± 0.08 | 1.28 ± 0.14 | 1.90 ± 0.27 **§#** |
| CAT-3 | 1.00 ± 0.00 | 0.98 ± 0.15 | 1.53 ± 0.32 | 2.76 ± 0.52 **§#** |
| ENT-1 | 1.00 ± 0.00 | 1.19 ± 0.08 | 0.51 ± 0.12 ***** | 0.67 ± 0.13 **§** |
| SELE | 1.00 ± 0.00 (n=2) | n.d. | 1.12 ± 0.00 (n=1) | n.d. |
| InR | 1.00 ± 0.00 | 1.39 ± 0.09 ***** | 1.40 ± 0.18 | 1.93 ± 0.14 **§#** |
| LAT-1 | 1.00 ± 0.00 | 1.03 ± 0.10 | 0.97 ± 0.31 | 0.94 ± 0.22 |
| LRP-1 | 1.00 ± 0.00 | 1.55 ± 0.21 | 0.89 ± 0.15 | 1.97 ± 0.45 **#** |
| LRP-8 | 1.00 ± 0.00 | 0.88 ± 0.11 | 0.48 ± 0.12 | 2.08 ± 0.31 **§#** |
| MCT-1 | 1.00 ± 0.00 | 1.16 ± 0.16 | 0.77 ± 0.17 | 0.65 ± 0.08 |
| MCT-8 | 1.00 ± 0.00 | 1.24 ± 0.09 | 0.36 ± 0.08 **(*)** | 0.44 ± 0.08 **§** |
| SLC1A1 | 1.00 ± 0.00 | n.d. | n.d. | n.d. |
| TfR | 1.00 ± 0.00 | 1.11 ± 0.09 | 0.73 ± 0.17 | 0.90 ± 0.17 |
| VEGF-A | 1.00 ± 0.00 | 1.41 ± 0.22 | 124.74 ± 43.53 **(*)** | 105.20 ± 28.91 **(§)** |
| WWC2 | 1.00 ± 0.00 | 1.09 ± 0.10 | 0.98 ± 0.24 | 0.88 ± 0.09 |
| CK8 | 1.00 ± 0.00 | 1.30 ± 0.08 | 2.69 ± 1.55 | 1.22 ± 0.54 |
| CK18 | 1.00 ± 0.00 | 1.33 ± 0.09 | 2.24 ± 1.17 | 1.44 ± 0.60 |
| CK19 | 1.00 ± 0.00 | 1.42 ± 0.10 | 5.85 ± 3.97 | 1.16 ± 0.54 |
| AQP1 | 1.00 ± 0.00 | 1.89 ± 0.38 | 2.13 ± 0.71 | 1.76 ± 0.65 |
| AQP2 | 1.00 ± 0.00 (n=1) | 0.68 ± 0.00 (n=1) | 1.56 ± 0.00 (n=1) | n.d. |
| AQP3 | 1.00 ± 0.00 | 1.42 ± 0.18 | 4.48 ± 2.72 | 1.97 ± 0.83 |
| AQP4 | 1.00 ± 0.00 | 0.95 ± 0.07 | 7.42 ± 4.35 | 0.49 ± 0.22 |
| AQP5 | 1.00 ± 0.00 | 1.69 ± 0.40 | 10.75 ± 7.98 | 2.05 ± 0.85 |
| AQP6 | 1.00 ± 0.00 | n.d. | n.d. | n.d. |
| AQP7 | 1.00 ± 0.00 | 1.20 ± 0.22 | 4.20 ± 3.22 | 0.67 ± 0.01 |
| AQP8 | 1.00 ± 0.00 | 1.91 ± 0.34 | 3.80 ± 2.55 | 2.69 ± 0.00 (n=1) |
| AQP9 | 1.00 ± 0.00 | 0.83 ± 0.22 | 3.65 ± 2.45 | 1.42 ± 0.35 |
| AQP10 | 1.00 ± 0.00 | 1.23 ± 0.02 | 0.39 ± 0.24 | 0.26 ± 0.11 **§** |
| AQP11 | 1.00 ± 0.00 | 1.18 ± 0.07 | 6.75 ± 4.27 | 1.45 ± 0.62 |
| MUC1A | 1.00 ± 0.00 | 1.25 ± 0.18 | 1.97 ± 1.14 | 1.44 ± 0.70 |
| MUC1B | 1.00 ± 0.00 | 1.39 ± 0.10 | 3.30 ± 2.16 | 1.76 ± 0.74 |
| MUC18 | 1.00 ± 0.00 | 1.39 ± 0.19 | 2.57 ± 1.54 | 1.33 ± 0.59 |
| MUC20 | 1.00 ± 0.00 | 1.18 ± 0.15 | 6.67 ± 4.60 | 2.19 ± 0.88 |
| e-cadherin | 1.00 ± 0.00 | 1.27 ± 0.06 | 1.39 ± 0.69 | 0.55 ± 0.24 |
| b-catenin tv1-3 | 1.00 ± 0.00 | 1.24 ± 0.12 | 1.71 ± 1.10 | 0.55 ± 0.26 |
| b-catenin tv4 | 1.00 ± 0.00 | 1.08 ± 0.15 | 2.32 ± 1.13 | 0.57 ± 0.23 |
| vimentin1 | 1.00 ± 0.00 | 1.41 ± 0.17 | 4.18 ± 2.81 | 1.60 ± 0.70 |
| Fibronectin | 1.00 ± 0.00 | 1.42 ± 0.14 | 1.77 ± 0.93 | 1.29 ± 0.55 |
| S100A4 tv1 | 1.00 ± 0.00 | 1.33 ± 0.16 | 2.07 ± 0.98 | 1.31 ± 0.55 |
| S100A4 tv2 | 1.00 ± 0.00 | 1.37 ± 0.16 | 1.18 ± 0.23 | 1.27 ± 0.07 |
| MFSD2A | 1.00 ± 0.00 (n=1) | 4.31 ± 0.00 (n=1) | n.d. | 2.10 ± 0.00 (n=1) |
| RAGE | 1.00 ± 0.00 | 1.78 ± 0.34 | 7.24 ± 3.16 | 1.95 ± 0.15 |

Supplementary table 9: Average values of mRNA expression levels in BCELC after 6h OGD in mono- or triple-culture with human primary astrocytes and pericytes (hAP) in comparison to the average values of mRNA expression in BCELC in mono-culture after 6h under normoxic conditions. Normalized to endogenous control PPIA. Values are given as x-fold ± SEM. N=4, n=1-4, two-way ANOVA with all pairwise multiple comparison Holm-Sidak in case of non-normality distribution or non-equal variances, p-value=0.05, * significant against normoxia mono, § significant against normoxia hAP, # significant against OGD mono. () indicates a trending regulation. For trending regulations: p< 0.075; n.d. not detectable; (n=1) indicates targets that were detect in only one sample

|  | Normoxia mono 6h | Normoxia hAP  6h | OGD mono  6h | OGD hAP  6h |
| --- | --- | --- | --- | --- |
| PPIA | 1.00 ± 0.00 | 1.00 ± 0.00 | 1.00 ± 0.00 | 1.00 ± 0.00 |
| b-actin | 1.00 ± 0.00 | 1.52 ± 0.66 | 1.37 ± 0.26 | 0.95 ± 0.21 |
| GADPH | 1.00 ± 0.00 | 1.60 ± 0.38 | 1.40 ± 0.16 | 1.06 ± 0.11 |
| B2M | 1.00 ± 0.00 | 1.56 ± 0.66 | 1.36 ±0.24 | 0.99 ± 0.18 |
| CLDN-1 | 1.00 ± 0.00 | 2.66 ± 1.06 | 2.74 ± 0.34 | 5.49 ± 2.91 |
| CLDN-2 | 1.00 ± 0.00 | 1.70 ± 0.61 | 2.15 ± 0.30 | 1.83 ± 0.40 |
| CLDN-3 | 1.00 ± 0.00 | 0.99 ± 0.16 | 0.95 ± 0.06 | 1.09 ± 0.19 |
| CLDN-4 | 1.00 ± 0.00 | 0.96 ± 0.07 | 0.95 ± 0.07 | 0.87 ± 0.08 |
| CLDN-5 | 1.00 ± 0.00 | 1.10 ± 0.16 | 2.69 ± 0.69 ***** | 1.21 ± 0.17 |
| CLDN-6 | 1.00 ± 0.00 | 1.44 ± 0.52 | 1.19 ± 0.27 | 0.73 ± 0.11 |
| CLDN-7 | 1.00 ± 0.00 | 0.98 ± 0.18 | 0.88 ± 0.05 | 1.01 ± 0.15 |
| CLDN-8 | 1.00 ± 0.00 | 1.39 ± 0.19 | 0.99 ± 0.23 | 1.76 ± 0.93 |
| CLDN-9 | 1.00 ± 0.00 | 0.80 ± 0.10 | 1.24 ± 0.20 | 0.91 ± 0.04 |
| CLDN-10 tva | 1.00 ± 0.00 | 1.22 ± 0.26 | 3.36 ± 0.21 ***** | 2.72 ± 0.74 **§** |
| CLDN-10 tvb | 1.00 ± 0.00 | 1.15 ± 0.18 | 2.43 ± 0 46 ***** | 2.04 ± 0.21 |
| CLDN-11 | 1.00 ± 0.00 | 1.79 ± 0.74 | 1.84 ± 0 37 | 1.34 ± 0.29 |
| CLDN-12 tv1 | 1.00 ± 0.00 | 1.31 ± 0.28 | 0.76 ± 0 16 | 0.73 ± 0.05 |
| CLDN-12 tv2 | 1.00 ± 0.00 | 1.01 ± 0.06 | 1.19 ± 0.02 ***** | 1.15 ± 0.01 **§** |
| CLDN-12 tv3 | 1.00 ± 0.00 | 1.18 ± 0.25 | 1.00 ± 0 04 | 0.86 ± 0.01 |
| CLDN-14 | n.d. | n.d. | n.d. | n.d. |
| CLDN-15 | 1.00 ± 0.00 | 1.40 ± 0.38 | 0.99 ± 0 14 | 1.01 ± 0.23 |
| CLDN-16 | 1.00 ± 0.00 | 1.46 ± 0.30 | 1.43 ± 0.22 | 1.40 ± 0.40 |
| CLDN-17 | 1.00 ± 0.00 | 0.99 ± 0.41 | 2.04 ± 0.44 ***** | 1.06 ± 0.24 |
| CLDN-18 | 1.00 ± 0.00 | 2.27 ± 1.05 | 1.79 ± 0.63 | 1.61 ± 0.82 |
| CLDN-19 | 1.00 ± 0.00 | 1.23 ± 0.11 | 0.89 ± 0.17 | 1.30 ± 0.15 |
| CLDN-20 | 1.00 ± 0.00 (n=1) | 0.43 ± 0.00 (n=1) | n.d. | 0.17 ± 0.00 (n=1) |
| CLDN-21 | 1.00 ± 0.00 | 2.81 ± 0.51 | 4.14 ± 0.41 (*****) | 3.83 ± 2.39 |
| CLDN-22 | 1.00 ± 0.00 | 1.07 ± 0.52 | 0.87 ± 0.26 | 2.43 ± 0.71 |
| CLDN-23 | 1.00 ± 0.00 | 1.13 ± 0.27 | 1.25 ± 0.49 | 0.79 ± 0.20 |
| CLDN-24 | 1.00 ± 0.00 | 1.55 ± 0.75 | 1.20 ± 0.34 | 2.61 ± 1.19 |
| CLDN-25 | 1.00 ± 0.00 | 2.55 ± 1.04 | 1.58 ± 0.27 | 1.78 ± 0.48 |
| CLDN-25 tv7 | 1.00 ± 0.00 | 2.57 ± 1.32 | 2.47 ± 0.29 | 1.53 ± 0.17 |
| CLDN-27 | 1.00 ± 0.00 (n=1) | 0.63 ± 0.00 (n=1) | n.d. | n.d. |
| JAM-1 | 1.00 ± 0.00 | 1.01 ± 0.07 | 1.08 ± 0.06 | 1.14 ± 0.12 |
| JAM-2 | 1.00 ± 0.00 | 1.08 ± 0.12 | 2.46 ± 0.35 ***** | 1.66 ± 0.31 |
| JAM-3 | 1.00 ± 0.00 | 1.08 ± 0.13 | 1.22 ± 0 09 | 1.32 ± 0.16 |
| ZO-1 | 1.00 ± 0.00 | 1.04 ± 0.07 | 1.54 ± 0 14 ***** | 1.29 ± 0.10 |
| ZO-2 | 1.00 ± 0.00 | 1.30 ± 0.37 | 1.24 ± 0.19 | 0.91 ± 0.20 |
| ZO-3 | 1.00 ± 0.00 | 1.13 ± 0.09 | 1.21 ± 0 18 | 0.95 ± 0.12 |
| vWF | 1.00 ± 0.00 | 0.59 ± 0.03 | 0.82 ± 0 13 | 1.04 ± 0.21 **§** |
| GLUT-1 | 1.00 ± 0.00 | 0.94 ± 0.15 | 6.26 ± 1.06 ***** | 2.01 ± 0.01 **§#** |
| Occludin | 1.00 ± 0.00 | 1.27 ± 0.35 | 1.06 ± 0.27 | 1.39 ± 0.41 |
| CDH5 | 1.00 ± 0.00 | 1.33 ± 0.48 | 2.22 ± 0.43 | 1.74 ± 0.40 |
| ABCB1 | 1.00 ± 0.00 | 1.14 ± 0.29 | 1.86 ± 0.44 ***** | 0.96 ± 0.13 |
| MRP-1 | 1.00 ± 0.00 | 1.46 ± 0.60 | 1.17 ± 0.19 | 0.83 ± 0.22 |
| MRP-2 | 1.00 ± 0.00 | 1.11 ± 0.17 | 2.33 ± 0.17 ***** | 2.26 ± 0.85 |
| MRP-3 | 1.00 ± 0.00 | 1.25 ± 0.15 | 1.67 ± 0.29 | 1.09 ± 0.31 |
| MRP-4 | 1.00 ± 0.00 | 0.90 ± 0.06 | 1.22 ± 0.03 ***** | 1.31 ± 0.07 **§** |
| MRP-5 | 1.00 ± 0.00 | 1.24 ± 0.44 | 1.19 ± 0.07 | 0.79 ± 0.14 |
| BCRP | 1.00 ± 0.00 | 0.81 ± 0.11 | 0.97 ± 0.09 | 0.77 ± 0.11 |
| Marveld2 (tricellulin) | 1.00 ± 0.00 | 1.37 ± 0.50 | 0.83 ± 0.19 | 0.82 ± 0.33 |
| CAT-1 | 1.00 ± 0.00 | 0.87 ± 0.10 | 2.26 ± 0.38 ***** | 1.37 ± 0.23 |
| CAT-3 | 1.00 ± 0.00 | 0.88 ± 0.03 | 1.24 ± 0.04 ***** | 1.22 ± 0.03 **§** |
| ENT-1 | 1.00 ± 0.00 | 1.11 ± 0.23 | 1.21 ± 0.19 | 1.14 ± 0.35 |
| SELE | 1.00 ± 0.00 (n=2) | n.d. | 1.01 ± 0.00 (n=1) | n.d. |
| InR | 1.00 ± 0.00 | 0.98 ± 0.18 | 1.41 ± 0.13 (*****) | 1.01 ± 0.07 |
| LAT-1 | 1.00 ± 0.00 | 1.02 ± 0.17 | 1.47 ± 0.09 | 1.47 ± 0.42 |
| LRP-1 | 1.00 ± 0.00 | 1.29 ± 0.49 | 1.51 ± 0.17 | 1.08 ± 0.18 |
| LRP-8 | 1.00 ± 0.00 | 0.97 ± 0.17 | 0.72 ± 0.05 | 0.57 ± 0.01 **§** |
| MCT-1 | 1.00 ± 0.00 | 0.93 ± 0.13 | 1.46 ± 0.12 (*****) | 1.34 ± 0.15 |
| MCT-8 | 1.00 ± 0.00 | 1.09 ± 0.23 | 1.14 ± 0.15 | 0.96 ± 0.23 |
| SLC1A1 | 1.00 ± 0.00 | n.d. | 0.09 ± 0.05 | 0.23 ± 0.19  (n=1) |
| TfR | 1.00 ± 0.00 | 0.90 ± 0.11 | 0.92 ± 0.12 | 0.70 ± 0.08 |
| VEGF-A | 1.00 ± 0.00 | 1.08 ± 0.23 | 16.57 ± 2.58 ***** | 6.09 ± 2.41 **§** |
| WWC2 | 1.00 ± 0.00 | 1.01 ± 0.06 | 1.87 ± 0.24 ***** | 1.17 ± 0.11 **§** |
| CK8 | 1.00 ± 0.00 | 1.98 ± 0.88 | 1.00 ± 0.15 | 0.79 ± 0.09 |
| CK18 | 1.00 ± 0.00 | 1.66 ± 0.48 | 0.91 ± 0.20 | 1.28 ± 0.28 |
| CK19 | 1.00 ± 0.00 | 2.36 ± 1.28 | 1.04 ± 0.17 | 0.70 ± 0.10 |
| AQP1 | 1.00 ± 0.00 | 2.26 ± 0.56 | 0.99 ± 0.29 | 1.34 ± 0.22 |
| AQP2 | 1.00 ± 0.00 | 3.04 ± 1.46 | 2.45 ± 0.55 | 1.12 ± 0.37 |
| AQP3 | 1.00 ± 0.00 | 1.54 ± 0.59 | 1.04 ± 0.22 | 1.26 ± 0.10 |
| AQP4 | 1.00 ± 0.00 | 6.65 ± 4.59 | 3.12 ± 1.10 | 1.17 ± 0.26 |
| AQP5 | 1.00 ± 0.00 | 2.43 ± 1.26 | 1.25 ± 0.28 | 0.95 ± 0.19 |
| AQP6 | 1.00 ± 0.00 (n=1) | n.d. | 0.87 ± 0.00 (n=1) | n.d. |
| AQP7 | 1.00 ± 0.00 | 1.53 ± 0.57 | 0.64 ± 0 15 | 0.75 ± 0.19 |
| AQP8 | n.d. | n.d. | n.d. | n.d. |
| AQP9 | 1.00 ± 0.00 | 3.52 ± 1.83 | 1.59 ± 0.28 | 1.89 ± 0.24 |
| AQP10 | 1.00 ± 0.00 | 2.82 ± 1.46 | 0.21 ± 0.03 | 0.35 ± 0.16 **§** |
| AQP11 | 1.00 ± 0.00 | 1.77 ± 0.66 | 0.75 ± 0.15 | 0.88 ± 0.09 |
| MUC1A | 1.00 ± 0.00 | 1.77 ± 0.60 | 1.05 ± 0.20 | 0.91 ± 0.14 |
| MUC1B | 1.00 ± 0.00 | 1.79 ± 0.71 | 1.13 ± 0.22 | 1.00 ± 0.08 |
| MUC18 | 1.00 ± 0.00 | 2.03 ± 0.98 | 1.13 ± 0.14 | 0.90 ± 0.04 |
| MUC20 | 1.00 ± 0.00 | 2.59 ± 1.32 | 1.50 ± 0.21 | 0.99 ± 0.06 |
| e-cadherin | 1.00 ± 0.00 | 2.16 ± 0.83 | 0.83 ± 0.14 | 0.78 ± 0.21 |
| b-catenin tv1-3 | 1.00 ± 0.00 | 2.35 ± 1.08 | 0.71 ± 0.17 | 0.72 ±0.01 |
| b-catenin tv4 | 1.00 ± 0.00 | 2.03 ± 0.93 | 1.14 ± 0.31 | 0.92 ± 0.12 |
| vimentin1 | 1.00 ± 0.00 | 2.46 ± 1.23 | 1.09 ± 0.09 | 0.70 ± 0.06 |
| Fibronectin | 1.00 ± 0.00 | 1.61 ± 0.45 | 0.94 ± 0.22 | 1.33 ± 0.37 |
| S100A4 tv1 | 1.00 ± 0.00 | 1.68 ± 0.41 | 0.80 ± 0.21 | 1.71 ± 0.75 |
| S100A4 tv2 | 1.00 ± 0.00 | 3.07 ± 1.69 | 0.79 ± 0.24 | 3.61 ± 2.37 |
| MFSD2A | 1.00 ± 0.00 | 0.93 ± 0.28 | 0.70 ± 0.41 | 0.21 ± 0.14 |
| RAGE | 1.00 ± 0.00 | 2.54 ± 1.11 | 1.51 ± 0.38 | 1.15 ± 0.06 |

Supplementary table 10: Average values of mRNA expression levels in BCELC after 7h OGD in mono- or triple-culture with human primary astrocytes and pericytes (hAP) in comparison to the average values of mRNA expression in BCELC in mono-culture after 7h under normoxic conditions. Normalized to endogenous control PPIA. Values are given as x-fold ± SEM. N=4, n=1-4, two-way ANOVA with all pairwise multiple comparison Holm-Sidak in case of non-normality distribution or non-equal variances, p-value=0.05, * significant against normoxia mono, § significant against normoxia hAP, # significant against OGD mono. () indicates a trending regulation. For trending regulations: p< 0.075; n.d. not detectable; (n=1) indicates targets that were detect in only one sample

|  | Normoxia mono 7h | Normoxia hAP  7h | OGD mono  7h | OGD hAP  7h |
| --- | --- | --- | --- | --- |
| PPIA | 1.00 ± 0.00 | 1.00 ± 0.00 | 1.00 ± 0.00 | 1.00 ± 0.00 |
| b-actin | 1.00 ± 0.00 | 1.22 ± 0.19 | 1.93 ± 0.33 | 1.53 ± 0.26 |
| GADPH | 1.00 ± 0.00 | 0.87 ± 0.14 | 1.60 ± 0.09 | 1.31 ± 0.21 |
| B2M | 1.00 ± 0.00 | 0.96 ± 0.17 | 1.83 ± 0.14 | 1.51 ± 0.49 |
| CLDN-1 | 1.00 ± 0.00 | 0.85 ± 0.10 | 0.95 ± 0.06 | 1.48 ± 0.41 |
| CLDN-2 | 1.00 ± 0.00 | 1.00 ± 0.06 | 2.24 ± 0.22 | 2.41 ± 0.27 |
| CLDN-3 | 1.00 ± 0.00 | 1.22 ± 0.20 | 0.79 ± 0.11 | 0.94 ± 0.30 |
| CLDN-4 | 1.00 ± 0.00 | 0.96 ± 0.04 | 1.00 ± 0.10 | 0.86 ± 0.05 |
| CLDN-5 | 1.00 ± 0.00 | 0.70 ± 0.06 | 2.59 ± 0.81 | 2.80 ± 0.22 **§** |
| CLDN-6 | 1.00 ± 0.00 | 0.72 ± 0.09 | 1.41 ± 0.24 | 0.90 ± 0.19 |
| CLDN-7 | 1.00 ± 0.00 | 1.16 ± 0.03 | 1.32 ± 0.23 | 1.20 ± 0.13 |
| CLDN-8 | 1.00 ± 0.00 | 1.08 ± 0.20 | 1.56 ± 0.43 | 0.71 ± 0.04 |
| CLDN-9 | 1.00 ± 0.00 | 1.01 ± 0.25 | 0.68 ± 0.15 | 1.32 ± 0.63 |
| CLDN-10 tva | 1.00 ± 0.00 | 1.00 ± 0.13 | 1.87 ± 0.12 | 2.78 ± 0.77 **§** |
| CLDN-10 tvb | 1.00 ± 0.00 | 1.15 ± 0.07 | 2.09 ± 0.10 ***** | 2.47 ± 0.45 **§** |
| CLDN-11 | 1.00 ± 0.00 | 1.08 ± 0.10 | 2.00 ± 0.37 | 2.77 ± 1.13 |
| CLDN-12 tv1 | 1.00 ± 0.00 | 0.93 ± 0.13 | 0.81 ± 0.12 | 0.61 ± 0.14 |
| CLDN-12 tv2 | 1.00 ± 0.00 | 0.96 ± 0.08 | 1.53 ± 0.03 ***** | 1.10 ± 0.10 |
| CLDN-12 tv3 | 1.00 ± 0.00 | 1.06 ± 0.16 | 1.46 ± 0.11 ***** | 1.10 ± 0.10 |
| CLDN-14 | 1.00 ± 0.00 | 0.62 ± 0.37 | 0.89 ± 0.29 | 1.37 ± 0.51 |
| CLDN-15 | 1.00 ± 0.00 | 0.88 ± 0.20 | 0.93 ± 0.13 | 0.65 ± 0.05 |
| CLDN-16 | 1.00 ± 0.00 | 0.56 ± 0.08 | 1.23 ± 0.39 | 0.84 ± 0.35 |
| CLDN-17 | 1.00 ± 0.00 | 0.82 ± 0.16 | 1.99 ± 0.37 | 1.32 ± 0.33 |
| CLDN-18 | 1.00 ± 0.00 | 1.88 ± 0.56 | 3.46 ± 1.03 | 3.79 ± 1.59 |
| CLDN-19 | 1.00 ± 0.00 | 1.25 ± 0.12 | 0.96 ± 0.37 | 0.86 ± 0.22 |
| CLDN-20 | 1.00 ± 0.00 | 0.52 ± 0.20 | n.d. | n.d. |
| CLDN-21 | 1.00 ± 0.00 | 3.20 ± 2.21 | 1.33 ± 0.57 | 2.31 ± 1.38 |
| CLDN-22 | 1.00 ± 0.00 | 1.17 ± 0.20 | 0.82 ± 0.08 | 1.06 ± 0.14 |
| CLDN-23 | 1.00 ± 0.00 | 1.10 ± 0.29 | 0.47 ± 0.06 | 0.58 ± 0.08 |
| CLDN-24 | 1.00 ± 0.00 | 2.18 ± 0.76 | 1.59 ± 0.17 | 2.07 ± 0.52 |
| CLDN-25 | 1.00 ± 0.00 | 0.68 ± 0.09 | 1.52 ± 0.32 | 2.42 ± 0.75 **§** |
| CLDN-25 tv7 | 1.00 ± 0.00 | 1.11 ± 0.14 | 3.94 ± 1.07 | 6.86 ± 2.91 **§** |
| CLDN-27 | 1.00 ± 0.00 | 0.63 ± 0.00 (n=1) | 0.96 ± 0.02 | 1.61 ± 0.87 |
| JAM-1 | 1.00 ± 0.00 | 1.06 ± 0.07 | 1.04 ± 0.07 | 1.08 ± 0.07 |
| JAM-2 | 1.00 ± 0.00 | 1.22 ± 0.16 | 1.57 ± 0.17 | 1.52 ± 0.22 |
| JAM-3 | 1.00 ± 0.00 | 1.05 ± 0.05 | 1.03 ± 0.15 | 1.22 ± 0.11 |
| ZO-1 | 1.00 ± 0.00 | 1.21 ± 0.10 | 1.53 ± 0.19 ***** | 1.60 ± 0.15 |
| ZO-2 | 1.00 ± 0.00 | 0.98 ± 0.18 | 1.93 ± 0.14 ***** | 1.58 ± 0.35 |
| ZO-3 | 1.00 ± 0.00 | 0.91 ± 0.03 | 0.96 ± 0.04 | 0.89 ± 0.16 |
| vWF | 1.00 ± 0.00 | 0.94 ± 0.11 | 0.91 ± 0.12 | 0.95 ± 0.07 |
| GLUT-1 | 1.00 ± 0.00 | 0.81 ± 0.11 | 6.48 ± 2.24 ***** | 6.19 ± 1.21 **§** |
| Occludin | 1.00 ± 0.00 | 0.87 ± 0.09 | 1.78 ± 0.03 ***** | 1.62 ± 0.10 **§** |
| CDH5 | 1.00 ± 0.00 | 1.02 ± 0.19 | 3.47 ± 0.50 | 4.25 ± 1.89 **§** |
| ABCB1 | 1.00 ± 0.00 | 0.76 ± 0.09 | 2.14 ± 0.52 | 2.77 ± 0.68 **§** |
| MRP-1 | 1.00 ± 0.00 | 0.97 ± 0.23 | 1.58 ± 0.06 | 1.32 ± 0.49 |
| MRP-2 | 1.00 ± 0.00 | 0.84 ± 0.10 | 1.92 ± 0.62 | 1.54 ± 0.39 |
| MRP-3 | 1.00 ± 0.00 | 0.94 ± 0.06 | 1.18 ± 0.27 | 1.52 ± 0.14 |
| MRP-4 | 1.00 ± 0.00 | 1.03 ± 0.06 | 1.43 ± 0.20 ***** | 1.42 ± 0.08 |
| MRP-5 | 1.00 ± 0.00 | 0.83 ± 0.20 | 1.12 ± 0.09 | 1.02 ± 0.25 |
| BCRP | 1.00 ± 0.00 | 0.84 ± 0.10 | 1.25 ± 0.17 | 1.04 ± 0.04 |
| Marveld2 (tricellulin) | 1.00 ± 0.00 | 0.85 ± 0.17 | 1.23 ± 0.23 | 0.90 ± 0.33 |
| CAT-1 | 1.00 ± 0.00 | 0.91 ± 0.10 | 2.10 ± 0.19 ***** | 2.43 ± 0.56 **§** |
| CAT-3 | 1.00 ± 0.00 | 0.86 ± 0.14 | 1.24 ± 0.11 | 1.07 ± 0.08 |
| ENT-1 | 1.00 ± 0.00 | 0.94 ± 0.14 | 1.33 ± 0.08 (*****) | 0.95 ± 0.08 |
| SELE | 1.00 ± 0.00 | 1.29 ± 0.64 | 0.44 ± 0.00 (n=1) | 7.11 ± 0.00 (n=1) |
| InR | 1.00 ± 0.00 | 0.93 ± 0.16 | 1.59 ± 0.08 ***** | 1.32 ± 0.23 |
| LAT-1 | 1.00 ± 0.00 | 1.12 ± 0.28 | 1.16 ± 0.23 | 1.72 ± 0.50 |
| LRP-1 | 1.00 ± 0.00 | 0.84 ± 0.09 | 1.68 ± 0.12 (*****) | 1.49 ± 0.42 |
| LRP-8 | 1.00 ± 0.00 | 0.89 ± 0.10 | 0.73 ± 0.11 | 0.82 ± 0.20 |
| MCT-1 | 1.00 ± 0.00 | 1.06 ± 0.10 | 1.44 ± 0.27 | 1.55 ± 0.21 |
| MCT-8 | 1.00 ± 0.00 | 0.91 ± 0.17 | 1.21 ± 0.03 | 0.92 ± 0.09 |
| SLC1A1 | 1.00 ± 0.00  (n=1) | 62.63 ± 0.00 (n=1) | 195.87 ± 0.00 (n=1) | 291.70 ± 0.00 (n=1) |
| TfR | 1.00 ± 0.00 | 0.98 ± 0.10 | 1.12 ± 0.10 | 0.90 ± 0.11 |
| VEGF-A | 1.00 ± 0.00 | 1.17 ± 0.25 | 19.28 ± 7.44 | 24.23 ± 7.42 **§** |
| WWC2 | 1.00 ± 0.00 | 0.93 ± 0.06 | 1.51 ± 0.12 ***** | 1.43 ± 0.08 **§** |
| CK8 | 1.00 ± 0.00 | 0.74 ± 0.18 | 1.11 ± 0.24 | 0.87 ± 0.28 |
| CK18 | 1.00 ± 0.00 | 0.71 ± 0.09 | 1.12 ± 0.14 | 1.14 ± 0.19 |
| CK19 | 1.00 ± 0.00 | 0.72 ± 0.17 | 1.23 ± 0.15 | 0.86 ± 0.24 |
| AQP1 | 1.00 ± 0.00 | 0.75 ± 0.25 | 1.31 ± 0.83 | 0.78 ± 0.32 |
| AQP2 | 1.00 ± 0.00 | 0.42 ± 0.16 | 0.60 ± 0.29 | 1.02 ± 0.40 |
| AQP3 | 1.00 ± 0.00 | 0.54 ± 0.12 | 0.97 ± 0.30 | 0.55 ± 0.09 |
| AQP4 | 1.00 ± 0.00 | 1.03 ± 0.36 | 1.42 ± 0.16 | 1.36 ± 0.38 |
| AQP5 | 1.00 ± 0.00 | 0.96 ± 0.09 | 0.81 ± 0.09 | 1.12 ± 0.31 |
| AQP6 | 1.00 ± 0.00 (n=1) | 1.80 ± 0.00 (n=1) | 1.99 ± 0.00 (n=1) | 0.98 ± 0.00 (n=1) |
| AQP7 | 1.00 ± 0.00 | 0.63 ± 0.15 | 0.81 ± 0.24 | 0.60 ± 0.22 |
| AQP8 | 1.00 ± 0.00 (n=1) | n.d. | n.d. | 0.97 ± 0.00 (n=1) |
| AQP9 | 1.00 ± 0.00 | 1.33 ± 0.39 | 2.63 ± 0.36 | 2.12 ± 0.34 |
| AQP10 | 1.00 ± 0.00 | 0.98 ± 0.32 | 0.58 ± 0.27 | 0.14 ± 0.01 |
| AQP11 | 1.00 ± 0.00 | 0.68 ± 0.11 | 0.99 ± 0.14 | 0.86 ± 0.17 |
| MUC1A | 1.00 ± 0.00 | 0.72 ± 0.07 | 1.12 ± 0.20 | 0.83 ± 0.08 |
| MUC1B | 1.00 ± 0.00 | 0.85 ± 0.19 | 1.30 ± 0.26 | 0.91 ± 0.08 |
| MUC18 | 1.00 ± 0.00 | 0.81 ± 0.19 | 1.82 ± 0.71 | 1.38 ± 0.60 |
| MUC20 | 1.00 ± 0.00 | 0.82 ± 0.21 | 1.34 ± 0.35 | 0.95 ± 0.24 |
| e-cadherin | 1.00 ± 0.00 | 0.58 ± 0.08 | 1.05 ± 0.25 | 0.71 ± 0.13 |
| b-catenin tv1-3 | 1.00 ± 0.00 | 0.73 ± 0.11 | 1.06 ± 0.33 | 0.80 ± 0.24 |
| b-catenin tv4 | 1.00 ± 0.00 | 0.66 ± 0.11 | 0.91 ± 0.21 | 0.79 ± 0.15 |
| vimentin1 | 1.00 ± 0.00 | 0.78 ± 0.16 | 1.28 ± 0.32 | 1.16 ± 0.47 |
| Fibronectin | 1.00 ± 0.00 | 0.77 ± 0.11 | 1.12 ± 0.30 | 1.23 ± 0.27 |
| S100A4 tv1 | 1.00 ± 0.00 | 0.93 ± 0.22 | 0.98 ± 0.21 | 1.08 ± 0.22 |
| S100A4 tv2 | 1.00 ± 0.00 | 1.50 ± 0.73 | 0.79 ± 0.17 | 1.19 ± 0.31 |
| MFSD2A | 1.00 ± 0.00 | 0.86 ± 0.33 | 2.82 ± 0.00 (n=1) | 2.73 ± 0.31 **§** |
| RAGE | 1.00 ± 0.00 | 0.87 ± 0.14 | 1.83 ± 0.52 | 2.89 ± 1.07 |

Supplementary table 11: Average values of mRNA expression levels in BCELC after 9h OGD in mono- or triple-culture with human primary astrocytes and pericytes (hAP) in comparison to the average values of mRNA expression in BCELC in mono-culture after 9h under normoxic conditions. Normalized to endogenous control PPIA. Values are given as x-fold ± SEM. N=4, n=1-4, two-way ANOVA with all pairwise multiple comparison Holm-Sidak in case of non-normality distribution or non-equal variances, p-value=0.05, * significant against normoxia mono, § significant against normoxia hAP, # significant against OGD mono. () indicates a trending regulation. For trending regulations: p< 0.075; n.d. not detectable; (n=1) indicates targets that were detect in only one sample

|  | Normoxia mono 9h | Normoxia hAP  9h | OGD mono  9h | OGD hAP  9h |
| --- | --- | --- | --- | --- |
| PPIA | 1.00 ± 0.00 | 1.00 ± 0.00 | 1.00 ± 0.00 | 1.00 ± 0.00 |
| b-actin | 1.00 ± 0.00 | 0.29 ± 0.12 | 2.94 ± 1.99 | 0.37 ± 0.13 |
| GADPH | 1.00 ± 0.00 | 0.57 ± 0.24 | 0.54 ± 0.13 | 0.46 ± 0.13 |
| B2M | 1.00 ± 0.00 | 0.33 ± 0.16 | 1.51 ± 0.95 | 0.31 ± 0.09 |
| CLDN-1 | 1.00 ± 0.00 | 2.70 ± 1.46 | 2.32± 0.95 | 3.02 ± 1.51 |
| CLDN-2 | 1.00 ± 0.00 | 0.45 ± 0.29 | 0.59 ± 0.10 | 0.55 ± 0.13 |
| CLDN-3 | 1.00 ± 0.00 | 3.70 ± 0.65 | 2.00 ± 0.54 | 3.87 ± 1.29 |
| CLDN-4 | 1.00 ± 0.00 | 1.20 ± 0.26 | 0.81 ± 0.23 | 1.02 ± 0.06 |
| CLDN-5 | 1.00 ± 0.00 | 0.32 ± 0.13 ***** | 2.36 ± 0.87 | 1.37 ± 0.93 |
| CLDN-6 | 1.00 ± 0.00 | 0.52 ± 0.20 | 0.55 ± 0.12 ***** | 0.39 ± 0.07 |
| CLDN-7 | 1.00 ± 0.00 | 2.33 ± 0.16 | 1.61 ± 0.75 | 2.50 ± 0.19 |
| CLDN-8 | 1.00 ± 0.00 | 1.26 ± 0.31 | 0.70 ± 0.34 | 1.90 ± 0.37 |
| CLDN-9 | 1.00 ± 0.00 | 0.99 ± 0.13 | 1.73 ± 1.09 | 1.03 ± 0.16 |
| CLDN-10 tva | 1.00 ± 0.00 | 0.92 ± 0.52 | 1.86 ± 0.26 | 2.22 ± 1.28 |
| CLDN-10 tvb | 1.00 ± 0.00 | 0.81 ± 0.27 | 1.39 ± 0.57 | 1.52 ± 0.44 |
| CLDN-11 | 1.00 ± 0.00 | 0.49 ± 0.24 | 0.89 ± 0.05 | 0.84 ± 0.44 |
| CLDN-12 tv1 | 1.00 ± 0.00 | 0.53 ± 0.29 | 0.11 ± 0.04 ***** | 0.22 ± 0.05 |
| CLDN-12 tv2 | 1.00 ± 0.00 | 0.79 ± 0.24 | 0.49 ± 0.16 | 0.72 ± 0.07 |
| CLDN-12 tv3 | 1.00 ± 0.00 | 0.60 ± 0.25 | 0.72 ± 0.19 | 0.42 ± 0.09 |
| CLDN-14 | 1.00 ± 0.00 (n=1) | 0.34 ± 0.00 (n=1) | 0.71 ± 0.00 (n=1) | 1.00 ± 0.00 (n=1) |
| CLDN-15 | 1.00 ± 0.00 | 0.55 ± 0.25 | 0.11 ± 0.04 ***** | 0.29 ± 0.05 |
| CLDN-16 | 1.00 ± 0.00 | 0.49 ± 0.01 ***** | 0.22 ± 0.02 ***** | 0.60 ± 0.19 |
| CLDN-17 | 1.00 ± 0.00 | 0.34 ± 0.11 | 0.87 ± 0.38 | 0.95 ± 0.54 |
| CLDN-18 | 1.00 ± 0.00 | 0.39 ± 0.22 ***** | 0.44 ± 0.12 ***** | 0.40 ± 0.14 |
| CLDN-19 | 1.00 ± 0.00 | 8.75 ± 1.44 | 6.28 ± 2.44 | 13.18 ± 4.29 |
| CLDN-20 | 1.00 ± 0.00 (n=1) | n.d. | 0.83 ± 0.00 (n=1) | 0.01 ± 0.00 (n=1) |
| CLDN-21 | 1.00 ± 0.00 | 3.18 ± 0.61 | 11.95 ± 5.77 | 10.81 ± 6.65 |
| CLDN-22 | 1.00 ± 0.00 | 19.53 ± 6.21 | 26.98 ± 0.61 | 25.02 ± 6.30 |
| CLDN-23 | 1.00 ± 0.00 | 0.24 ± 0.02 ***** | 0.19 ± 0.08 ***** | 0.25 ± 0.01 |
| CLDN-24 | 1.00 ± 0.00 | 2.30 ± 0.25 | 3.18 ± 0.26 | 2.75 ± 0.32 |
| CLDN-25 | 1.00 ± 0.00 | 0.46 ± 0.23 | 3.12 ± 2.12 | 0.29 ± 0.12 |
| CLDN-25 tv7 | 1.00 ± 0.00 | 0.55 ± 0.23 | 6.95 ± 5.05 | 0.43 ± 0.09 |
| CLDN-27 | 1.00 ± 0.00 | 1.26 ± 0.64 | 4.90 ± 3.02 | 0.61 ± 0.33 |
| JAM-1 | 1.00 ± 0.00 | 2.05 ± 0.05 | 1.33 ± 0.52 | 2.06 ± 0.29 |
| JAM-2 | 1.00 ± 0.00 | 1.34 ± 0.29 | 1.51 ± 0.15 (*****) | 0.99 ± 0.09 |
| JAM-3 | 1.00 ± 0.00 | 2.28 ± 0.45 | 1.55 ± 0.62 | 1.94 ± 0.13 |
| ZO-1 | 1.00 ± 0.00 | 1.42 ± 0.11 | 6.47 ± 3.09 | 1.95 ± 0.11 |
| ZO-2 | 1.00 ± 0.00 | 0.41 ± 0.19 | 0.71 ± 0.26 | 0.31 ± 0.06 |
| ZO-3 | 1.00 ± 0.00 | 1.59 ± 0.32 | 0.98 ± 0.37 | 1.45 ± 0.11 |
| vWF | 1.00 ± 0.00 | 0.80 ± 0.15 | 0.42 ± 0.03 ***** | 0.75 ± 0.14 |
| GLUT-1 | 1.00 ± 0.00 | 0.96 ± 0.28 | 10.88 ± 4.14 ***** | 1.61 ± 0.62 **#** |
| Occludin | 1.00 ± 0.00 | 0.64 ± 0.26 | 2.13 ± 0.98 | 0.92 ± 0.26 |
| CDH5 | 1.00 ± 0.00 | 0.45 ± 0.18 | 4.87 ± 2.85 | 1.14 ± 0.38 |
| ABCB1 | 1.00 ± 0.00 | 0.49 ± 0.20 | 1.25 ± 0.29 | 0.35 ± 0.12 **#** |
| MRP-1 | 1.00 ± 0.00 | 0.27 ± 0.14 ***** | 0.20 ± 0.04 ***** | 0.22 ± 0.06 |
| MRP-2 | 1.00 ± 0.00 | 0.62 ± 0.18 | 0.82 ± 0.03 | 0.45 ± 0.04 |
| MRP-3 | 1.00 ± 0.00 | 1.44 ± 0.34 | 2.68 ± 0.52 ***** | 1.83 ± 0.10 |
| MRP-4 | 1.00 ± 0.00 | 1.40 ± 0.29 | 1.89 ± 0.80 | 2.01 ± 0.17 |
| MRP-5 | 1.00 ± 0.00 | 0.35 ± 0.18 ***** | 0.19 ± 0.06 ***** | 0.22 ± 0.05 |
| BCRP | 1.00 ± 0.00 | 0.95 ± 0.18 | 0.58 ± 0.13 (*****) | 0.89 ± 0.14 |
| Marveld2 (tricellulin) | 1.00 ± 0.00 | 0.27 ± 0.14 | 1.21 ± 0.87 | 0.19 ± 0.03 |
| CAT-1 | 1.00 ± 0.00 | 0.76 ± 0.23 | 1.56 ± 0.50 | 0.99 ± 0.14 |
| CAT-3 | 1.00 ± 0.00 | 1.13 ± 0.31 | 1.55 ± 0.21 | 1.51 ± 0.25 |
| ENT-1 | 1.00 ± 0.00 | 0.77 ± 0.26 | 0.71 ± 0.16 | 0.89 ± 0.04 |
| SELE | 1.00 ± 0.00 (n=1) | 1.51 ± 0.00 (n=1) | n.d. | 0.38 ± 0.00 (n=1) |
| InR | 1.00 ± 0.00 | 0.68 ± 0.24 | 0.63 ± 0.10 | 0.51 ± 0.08 |
| LAT-1 | 1.00 ± 0.00 | 4.01 ± 0.56 | 3.59 ± 1.16 | 4.82 ± 1.00 |
| LRP-1 | 1.00 ± 0.00 | 0.56 ± 0.28 | 0.71 ± 0.17 | 0.50 ± 0.12 |
| LRP-8 | 1.00 ± 0.00 | 0.69 ± 0.35 | 0.44 ± 0.21 | 0.58 ± 0.09 |
| MCT-1 | 1.00 ± 0.00 | 5.22 ± 1.14 | 5.28 ± 1.89 | 7.53 ± 2.47 |
| MCT-8 | 1.00 ± 0.00 | 0.68 ± 0.25 | 0.51 ± 0.10 | 0.56 ± 0.06 |
| SLC1A1 | 1.00 ± 0.00 (n=1) | n.d. | 652.18 ± 0.00 (n=1) | 1.03 ± 0.00  (n=1) |
| TfR | 1.00 ± 0.00 | 1.28 ± 0.33 | 1.27 ± 0.39 | 1.10 ± 0.04 |
| VEGF-A | 1.00 ± 0.00 | 0.57 ± 0.32 | 11.65 ± 1.80 ***** | 4.87 ± 3.78 |
| WWC2 | 1.00 ± 0.00 | 1.56 ± 0.19 | 1.47 ± 0.52 | 1.69 ± 0.14 |
| CK8 | 1.00 ± 0.00 | 0.61 ± 0.32 | 3.02 ± 1.90 | 0.44 ± 0.20 |
| CK18 | 1.00 ± 0.00 | 0.58 ± 0.30 | 3.73 ± 2.48 | 0.41 ± 0.12 |
| CK19 | 1.00 ± 0.00 | 0.50 ± 0.25 | 3.91 ± 2.61 | 0.46 ± 0.14 |
| AQP1 | 1.00 ± 0.00 | 0.83 ± 0.55 | 1.65 ± 0.81 | 0.58 ± 0.35 |
| AQP2 | 1.00 ± 0.00 | 0.38 ± 0.20 | 2.62 ± 1.54 | 0.19 ± 0.11 |
| AQP3 | 1.00 ± 0.00 | 1.05 ± 0.68 | 2.96 ± 1.20 | 0.49 ± 0.30 |
| AQP4 | 1.00 ± 0.00 | 0.53 ± 0.24 | 3.48 ± 2.19 | 0.48 ± 0.19 |
| AQP5 | 1.00 ± 0.00 | 0.40 ± 0.23 | 2.04 ± 1.36 | 0.21 ± 0.11 |
| AQP6 | 1.00 ± 0.00 | 2.37 ± 0.00 (n=1) | 2.55 ± 1.43 | n.d. |
| AQP7 | 1.00 ± 0.00 | 0.65 ± 0.42 | 1.52 ± 0.96 | 0.49 ± 0.07 |
| AQP8 | 1.00 ± 0.00 (n=1) | n.d. | 0.35 ± 0.00 (n=1) | n.d. |
| AQP9 | 1.00 ± 0.00 | 1.15 ± 0.63 | 12.50 ± 9.09 | 0.64 ± 0.34 |
| AQP10 | 1.00 ± 0.00 | 0.61 ± 0.31 | 0.42 ± 0.28 | 0.17 ± 0.06 |
| AQP11 | 1.00 ± 0.00 | 0.48 ± 0.24 | 3.22 ± 2.11 | 0.38 ± 0.14 |
| MUC1A | 1.00 ± 0.00 | 0.61 ± 0.34 | 1.91 ± 1.18 | 0.32 ± 0.10 |
| MUC1B | 1.00 ± 0.00 | 0.59 ± 0.35 | 1.86 ± 1.09 | 0.39 ± 0.15 |
| MUC18 | 1.00 ± 0.00 | 0.56 ± 0.28 | 3.19 ± 1.99 | 0.63 ± 0.23 |
| MUC20 | 1.00 ± 0.00 | 0.63 ± 0.31 | 4.32 ± 2.72 | 0.69 ± 0.32 |
| e-cadherin | 1.00 ± 0.00 | 0.71 ± 0.35 | 2.18 ± 1.36 | 0.40 ± 0.12 |
| b-catenin tv1-3 | 1.00 ± 0.00 | 0.51 ± 0.25 | 2.12 ± 1.32 | 0.33 ± 0.09 |
| b-catenin tv4 | 1.00 ± 0.00 | 0.35 ± 0.09 | 3.38 ± 2.19 | 0.24 ± 0.05 |
| vimentin1 | 1.00 ± 0.00 | 0.60 ± 0.31 | 2.27 ± 1.34 | 0.49 ± 0.23 |
| Fibronectin | 1.00 ± 0.00 | 0.61 ± 0.30 | 3.49 ± 2.29 | 0.43 ± 0.13 |
| S100A4 tv1 | 1.00 ± 0.00 | 0.59 ± 0.32 | 2.17 ± 1.27 | 0.42 ± 0.19 |
| S100A4 tv2 | 1.00 ± 0.00 | 0.55 ± 0.28 | 1.28 ± 0.75 | 0.22 ± 0.07 |
| MFSD2A | 1.00 ± 0.00 | 3.26 ± 2.39 | 14.61 ± 8.73 | n.d. |
| RAGE | 1.00 ± 0.00 | 0.52 ± 0.28 | 3.10 ± 2.14 | 0.35 ± 0.11 |

Supplementary table 12: Average values of mRNA expression levels in BCELC in mono- or triple-culture with human primary astrocytes and pericytes (hAP) after 6h under normoxic conditions, 6h OGD, 24h under normoxic conditions or after 6h OGD followed by an 18h recovery phase under normoxic conditions in restored glucose levels. mRNA level changes were normalized to values of mRNA expression in BCELC in mono-culture after 6h under normoxic conditions. Normalized to endogenous control PPIA. Values are given as x-fold ± SEM. N=4, n=9-12, two-way ANOVA with all pairwise multiple comparison Holm-Sidak in case of non-normality distribution or non-equal variances, p-value=0.05, * significant against 6h normoxia mono, § significant against 6h normoxia hAP, # significant against 6h OGD mono, ~ significant against 6h OGD hAP, + significant against 24h normoxia mono, $ significant against 24h normoxia hAP, & significant against 24h OGD mono. () indicates a trending regulation. For trending regulations: p< 0.075; for CLDN-9, (**~**): p=0.081; n.d. not detectable; (n=1) indicates targets that were detect in only one sample

|  | Normoxia mono 6h | Normoxia hAP  6h | OGD mono  6h | OGD hAP  6h | Normoxia mono 24h | Normoxia hAP  24h | OGD mono  18h OGR | OGD hAP  18h OGR |
| --- | --- | --- | --- | --- | --- | --- | --- | --- |
| PPIA | 1.00 ± 0.00 | 1.00 ± 0.00 | 1.00 ± 0.00 | 1.00 ± 0.00 | 1.00 ± 0.00 | 1.00 ± 0.00 | 1.00 ± 0.00 | 1.00 ± 0.00 |
| b-actin | 1.00 ± 0.00 | 3.24 ± 1.93 | 1.29 ± 0.17 | 1.11 ± 0.03 | 21.65 ± 17.29 | 0.95 ± 0.06 | 4.98 ± 2.25 | 0.91 ± 0.06 |
| GADPH | 1.00 ± 0.00 | 0.92 ± 0.22 | 1.24 ± 0.22 | 1.12 ± 0.05 | 5.40 ± 2.99 | 0.91 ± 0.14 | 1.30 ± 0.54 | 1.02 ± 0.08 |
| B2M | 1.00 ± 0.00 | 1.46 ± 0.48 | 0.99 ± 0.12 | 1.14 ± 0.11 | 16.25 ± 12.44 | 0.81 ± 0.11 | 4.64 ± 3.09 | 1.11 ± 0.15 |
| CLDN-1 | 1.00 ± 0.00 | 1.06 ± 0.12 | 1.24 ± 0.20 | 2.13 ± 0.23 ***§#** | 1.51 ± 0.11 | 1.87 ± 0.13 **§** | 2.10 ± 0.24 **#** | 1.81 ± 0.23 |
| CLDN-2 | 1.00 ± 0.00 | 1.07 ± 0.30 | 1.49 ± 0.88 | 1.53 ± 0.79 | 10.46 ± 5.58 | 0.93 ± 0.26 | 1.58 ± 1.16 | 2.14 ± 1.31 |
| CLDN-3 | 1.00 ± 0.00 | 0.89 ± 0.24 | 0.74 ± 0.18 | 0.70 ± 0.12 | 1.04 ± 0.43 | 2.02 ± 0.42 **§** | 1.13 ± 0.48 | 1.79 ± 0.09 ***~*** |
| CLDN-4 | 1.00 ± 0.00 | 0.79 ± 0.19 | 0.78 ± 0.15 | 0.68 ± 0.06 | 1.37 ± 0.31 | 1.14 ± 0.12 | 0.87 ± 0.20 | 1.32 ± 0.09 ***~*** |
| CLDN-5 | 1.00 ± 0.00 | 1.61 ± 0.28 | 1.96 ± 0.41 | 2.93 ± 1.09 | 13.72 ± 9.25 | 1.87 ± 0.38 | 7.31 ± 5.05 | 2.41 ± 0.68 |
| CLDN-6 | 1.00 ± 0.00 | 0.82 ± 0.16 | 0.86 ± 0.16 | 0.81 ± 0.05 | 7.33 ± 4.71 | 0.94 ± 0.11 | 2.22 ± 1.32 | 1.20 ± 0.11 |
| CLDN-7 | 1.00 ± 0.00 | 0.84 ± 0.22 | 0.97 ± 0.20 | 1.08 ± 0.09 | 1.68 ± 0.50 (*****) | 1.56 ± 0.07 (**§**) | 1.10 ± 0.26 | 1.90 ± 0.13 ***~*** |
| CLDN-8 | 1.00 ± 0.00 | 0.99 ± 0.31 | 0.74 ± 0.22 | 1.03 ± 0.10 | 4.44 ± 0.84 | 2.12 ± 0.35 **+** | 1.11 ± 0.33 **+** | 1.64 ± 0.24 **+** |
| CLDN-9 | 1.00 ± 0.00 | 0.65 ± 0.18 | 0.69 ± 0.16 | 0.64 ± 0.06 | 1.55 ± 0.38 (*****) | 1.11 ± 0.10 | 0.83 ± 0.24 | 1.15 ± 0.10 (***~***) |
| CLDN-10 tva | 1.00 ± 0.00 | 1.51 ± 0.49 | 2.97 ± 0.91 | 3.35 ± 0.53 | 4.31 ± 1.66 | 1.43 ± 0.47 | 1.65 ± 0.31 | 2.16 ± 0.55 |
| CLDN-10 tvb | 1.00 ± 0.00 | 0.78 ± 0.21 | 1.86 ± 0.42 ***§** | 2.59 ± 0.18 ***§** | 0.70 ± 0.15 | 0.49 ± 0.05 | 0.47 ± 0.14 **#** | 0.69 ± 0.08 ***~*** |
| CLDN-11 | 1.00 ± 0.00 | 0.84 ± 0.20 | 1.03 ± 0.25 | 1.46 ± 0.09 | 4.43 ± 2.91 | 0.51 ± 0.06 | 0.78 ± 0.40 | 0.56 ± 0.07 |
| CLDN-12 tv1 | 1.00 ± 0.00 | 0.88 ± 0.26 | 0.67 ± 0.17 | 0.55 ± 0.05 | 4.46 ± 2.52 | 0.70 ± 0.08 | 1.35 ± 0.80 | 1.15 ± 0.15 |
| CLDN-12 tv2 | 1.00 ± 0.00 | 0.80 ± 0.21 | 1.14 ± 0.26 | 1.00 ± 0.04 | 2.68 ± 1.03 | 0.92 ± 0.10 | 1.03 ± 0.48 | 1.10 ± 0.08 |
| CLDN-12 tv3 | 1.00 ± 0.00 | 0.92 ± 0.17 | 0.98 ± 0.23 | 0.89 ± 0.04 | 5.37 ± 3.18 | 0.88 ± 0.11 | 1.65 ± 0.96 | 1.09 ± 0.10 |
| CLDN-14 | 1.00 ± 0.00 | 2.60 ± 0.26 | 2.27 ± 0.40 | 4.29 ± 1.77 | 3.49 ± 1.24 | 2.79 ± 0.85 | 3.19 ± 1.05 | 2.51 ± 0.38 |
| CLDN-15 | 1.00 ± 0.00 | 0.77 ± 0.16 | 0.72 ± 0.15 | 0.55 ± 0.12 | 7.16 ± 2.61 ***** | 2.44 ± 0.43 | 4.50 ± 2.67 (**#**) | 3.07 ± 0.47 |
| CLDN-16 | 1.00 ± 0.00 | 1.60 ± 0.47 | 1.65 ± 0.48 | 1.11 ± 0.14 | 10.92 ± 5.76 | 2.08 ± 1.05 | 1.59 ± 0.16 | 2.10 ± 0.62 |
| CLDN-17 | 1.00 ± 0.00 | 0.93 ± 0.28 | 2.16 ± 0.87 | 1.66 ± 0.25 | 12.45 ± 6.06 | 2.05 ± 0.28 | 2.46 ± 0.64 | 1.89 ± 0.36 |
| CLDN-18 | 1.00 ± 0.00 | 0.99 ± 0.29 | 0.81 ± 0.19 | 0.95 ± 0.27 | 20.53 ± 11.95 ***** | 2.62 ± 0.99 | 14.24 ± 9.31 | 3.15 ± 1.01 |
| CLDN-19 | 1.00 ± 0.00 | 1.05 ± 0.30 | 0.87 ± 0.22 | 1.39 ± 0.25 | 1.65 ± 0.48 | 1.97 ± 0.17 **§** | 0.74 ± 0.20 **$** | 2.05 ± 0.23 **&** |
| CLDN-21 | 1.00 ± 0.00 | 1.60 ± 0.36 | 2.44 ± 1.27 | 2.84 ± 0.89 | 8.40 ± 2.11 ***** | 4.10 ± 1.53 | 2.78 ± 1.16 | 4.59 ± 0.83 |
| CLDN-22 | 1.00 ± 0.00 | 1.35 ± 0.55 | 1.46 ± 0.53 | 1.46 ± 0.39 | 3.37 ± 0.72 | 2.02 ± 0.27 | 1.27 ± 0.44 | 1.97 ± 0.34 |
| CLDN-23 | 1.00 ± 0.00 | 1.19 ± 0.35 | 0.85 ± 0.29 | 0.74 ± 0.25 | 3.01 ± 1.17 ***** | 1.66 ± 0.40 | 2.19 ± 0.74 | 1.05 ± 0.44 |
| CLDN-24 | 1.00 ± 0.00 | 1.57 ± 0.03 | 0.76 ± 0.22 | 1.07 ± 0.29 | 4.38 ± 0.52 ***** | 3.44 ± 0.70 **§** | 2.05 ± 0.67 (**+**) | 2.37 ± 0.36 (***~***) |
| CLDN-25 | 1.00 ± 0.00 | 0.70 ± 0.21 | 0.98 ± 0.31 | 0.51 ± 0.17 | 0.70 ± 0.23 | 0.90 ± 0.07 | 2.07 ± 1.22 | 1.14 ± 0.12 |
| CLDN-25 tv7 | 1.00 ± 0.00 | 1.07 ± 0.15 | 1.22 ± 0.36 | 0.94 ± 0.23 | 1.55 ± 0.31 | 0.80 ± 0.08 | 1.87 ± 0.66 | 0.81 ± 0.15 |
| CLDN-27 | 1.00 ± 0.00 | 1.17 ± 0.00 (n=1) | n.d. | 2.55 ± 0.71 | 0.94 ± 0.16 | 4.69 ± 2.03 | 6.11 ± 2.01 | 6.03 ± 1.57 |
| JAM-1 | 1.00 ± 0.00 | 0.92 ± 0.28 | 0.97 ± 0.24 | 1.01 ± 0.13 | 1.18 ± 0.36 | 1.08 ± 0.14 | 0.71 ± 0.20 | 1.23 ± 0.18 |
| JAM-2 | 1.00 ± 0.00 | 0.96 ± 0.24 | 1.63 ± 0.38 | 0.90 ± 0.11 | 2.01 ± 0.72 | 1.08 ± 0.20 | 1.43 ± 0.44 | 1.24 ± 0.20 |
| JAM-3 | 1.00 ± 0.00 | 0.90 ± 0.27 | 1.16 ± 0.28 | 1.67 ± 0.10 | 1.48 ± 0.48 | 1.13 ± 0.10 | 0.79 ± 0.20 | 1.50 ± 0.22 |
| ZO-1 | 1.00 ± 0.00 | 0.98 ± 0.15 | 1.64 ± 0.32 | 1.65 ± 0.19 | 3.19 ± 0.35 ***** | 2.68 ± 0.13 **§** | 1.90 ± 0.29 **+** | 2.69 ± 0.27 ***~*** |
| ZO-2 | 1.00 ± 0.00 | 0.85 ± 0.08 | 0.97 ± 0.19 | 0.96 ± 0.12 | 8.25 ± 5.53 | 0.97 ± 0.14 | 3.39 ± 2.34 | 1.39 ± 0.18 |
| ZO-3 | 1.00 ± 0.00 | 0.96 ± 0.29 | 0.85 ± 0.23 | 0.76 ± 0.10 | 1.53 ± 0.42 | 1.12 ± 0.13 | 0.67 ± 0.23 | 1.44 ± 0.31 |
| vWF | 1.00 ± 0.00 | 0.76 ± 0.22 | 0.82 ± 0.09 | 1.08 ± 0.19 | 2.72 ± 0.60 ***** | 2.39 ± 0.31 **§** | 2.31 ± 0.54 **#** | 3.72 ± 0.51 ***~*** |
| GLUT-1 | 1.00 ± 0.00 | 0.87 ± 0.13 | 5.18 ± 1.10 ***§** | 2.48 ± 0.41 **#** | 2.75 ± 0.97 (*****) | 1.26 ± 0.11 | 1.74 ± 0.75 **#** | 1.74 ± 0.21 |
| Occludin | 1.00 ± 0.00 | 1.14 ± 0.07 | 1.48 ± 0.32 | 1.25 ± 0.28 | 2.38 ± 0.95 | 1.11 ± 0.26 | 2.94 ± 1.11 | 1.26 ± 0.31 |
| CDH5 | 1.00 ± 0.00 | 1.23 ± 0.24 | 1.97 ± 0.46 | 2.31 ± 0.49 | 5.14 ± 3.65 | 0.45 ± 0.10 | 1.31 ± 0.75 | 0.55 ± 0.14 |
| ABCB1 | 1.00 ± 0.00 | 0.71 ± 0.10 | 1.67 ± 0.13 | 2.72 ± 0.35 | 6.44 ± 3.55 | 0.92 ± 0.12 | 4.70 ± 3.38 | 1.61 ± 0.34 |
| MRP-1 | 1.00 ± 0.00 | 0.80 ± 0.18 | 0.93 ± 0.18 | 1.11 ± 0.19 | 13.02 ± 9.70 | 0.86 ± 0.13 | 2.95 ± 2.02 | 1.13 ± 0.12 |
| MRP-2 | 1.00 ± 0.00 | 0.80 ± 0.16 | 1.74 ± 0.43 | 0.98 ± 0.10 | 2.46 ± 0.96 | 0.75 ± 0.14 | 1.41 ± 0.40 | 1.21 ± 0.09 |
| MRP-3 | 1.00 ± 0.00 | 1.06 ± 0.24 | 2.26 ± 0.73 | 2.56 ± 0.20 | 2.07 ± 0.72 | 1.08 ± 0.29 | 0.67 ± 0.16 **#** | 1.13 ± 0.17 ***~*** |
| MRP-4 | 1.00 ± 0.00 | 0.89 ± 0.21 | 1.27 ± 0.26 | 1.48 ± 0.10 | 0.88 ± 0.28 | 0.74 ± 0.03 | 0.46 ± 0.10 **#** | 0.88 ± 0.07 ***~*** |
| MRP-5 | 1.00 ± 0.00 | 0.75 ± 0.18 | 0.87 ± 0.16 | 1.00 ± 0.11 | 6.06 ± 4.03 | 0.68 ± 0.08 | 2.00 ± 1.18 | 1.08 ± 0.04 |
| BCRP | 1.00 ± 0.00 | 0.73 ± 0.16 | 1.04 ± 0.24 | 0.81 ± 0.16 | 1.56 ± 0.31 | 0.90 ± 0.10 | 1.23 ± 0.45 | 1.48 ± 0.22 |
| Marveld2 (tricellulin) | 1.00 ± 0.00 | 2.00 ± 0.92 | 0.68 ± 0.12 | 0.75 ± 0.10 | 24.48 ± 19.57 | 0.79 ± 0.12 | 4.47 ± 2.41 | 0.94 ± 0.08 |
| CAT-1 | 1.00 ± 0.00 | 0.70 ± 0.15 | 2.28 ± 0.37 | 2.48 ± 0.23 **§** | 2.20 ± 0.58 ***** | 1.07 ± 0.09 | 1.48 ± 0.77 | 1.28 ± 0.20 ***~*** |
| CAT-3 | 1.00 ± 0.00 | 0.84 ± 0.18 | 1.03 ± 0.22 | 1.25 ± 0.15 | 0.59 ± 0.10 ***** | 0.38 ± 0.03 **§** | 0.38 ± 0.12 **#** | 0.57 ± 0.06 ***~*** |
| ENT-1 | 1.00 ± 0.00 | 0.82 ± 0.17 | 0.87 ± 0.20 | 1.07 ± 0.08 | 3.88 ± 1.81 | 1.02 ± 0.08 | 1.39 ± 0.72 | 1.29 ± 0.18 |
| InR | 1.00 ± 0.00 | 0.69 ± 0.15 | 1.15 ± 0.23 | 1.05 ± 0.14 | 4.36 ± 2.11 | 1.29 ± 0.11 | 1.81 ± 0.94 | 1.55 ± 0.21 |
| LAT-1 | 1.00 ± 0.00 | 0.94 ± 0.29 | 1.62 ± 0.48 | 1.66 ± 0.30 | 1.42 ± 0.43 | 1.26 ± 0.14 | 0.85 ± 0.35 | 1.56 ± 0.20 |
| LRP-1 | 1.00 ± 0.00 | 0.93 ± 0.24 | 1.17 ± 0.27 | 1.37 ± 0.22 | 7.94 ± 4.96 | 1.11 ± 0.14 | 2.27 ± 1.50 | 1.36 ± 0.18 |
| LRP-8 | 1.00 ± 0.00 | 0.75 ± 0.19 | 0.68 ± 0.15 | 0.95 ± 0.06 | 2.19 ± 0.86 | 0.66 ± 0.06 | 1.20 ± 0.43 | 1.05 ± 0.06 |
| MCT-1 | 1.00 ± 0.00 | 0.93 ± 0.28 | 1.21 ± 0.27 | 1.42 ± 0.23 | 1.11 ± 0.32 | 1.28 ± 0.16 | 0.79 ± 0.24 | 1.53 ± 0.21 |
| MCT-8 | 1.00 ± 0.00 | 0.79 ± 0.20 | 0.77 ± 0.20 | 0.93 ± 0.11 | 6.53 ± 2.57 ***** | 2.07 ± 0.28 (**+**) | 2.15 ± 1.17 (**+**) | 1.78 ± 0.29 **+** |
| TfR | 1.00 ± 0.00 | 0.77 ± 0.18 | 0.73 ± 0.18 | 0.73 ± 0.09 | 1.20 ± 0.23 | 0.78 ± 0.09 | 1.15 ± 0.50 | 1.40 ± 0.24 |
| VEGF-A | 1.00 ± 0.00 | 0.84 ± 0.18 | 11.50 ± 1.80 ***§** | 10.92 ± 1.29 ***§** | 3.75 ± 2.49 | 0.60 ± 0.09 | 1.95 ± 1.15 **#** | 1.34 ± 0.15 ***~*** |
| VEGF-A tv10 | 1.00 ± 0.00 | 0.77 ± 0.39 | 48.83 ± 23.74 ***§** | 32.99 ± 8.64 | 2.08 ± 1.56 | 0.33 ± 0.18 | 0.39 ± 0.18 **#** | 1.59 ± 0.62 ***~*** |
| LSR | 1.00 ± 0.00 | 0.79 ± 0.20 | 1.14 ± 0.24 | 1.06 ± 0.09 | 3.21 ± 1.31 | 0.95 ± 0.09 | 1.41 ± 0.73 | 1.10 ± 0.09 |
| WWC2 | 1.00 ± 0.00 | 0.79 ± 0.21 | 1.80 ± 0.42 | 1.48 ± 0.10 | 1.97 ± 0.71 | 1.26 ± 0.08 | 1.03 ± 0.21 | 1.76 ± 0.18 |
| CK8 | 1.00 ± 0.00 | 2.16 ± 1.03 | 1.79 ± 0.28 | 1.32 ± 0.15 | 4.18 ± 1.65 | 1.05 ± 0.11 | 6.68 ± 3.79 | 1.16 ± 0.17 |
| CK18 | 1.00 ± 0.00 | 1.11 ± 0.16 | 1.40 ± 0.07 | 1.15 ± 0.09 | 1.79 ± 0.38 | 0.95 ± 0.13 | 2.51 ± 0.83 | 1.01 ± 0.11 |
| CK19 | 1.00 ± 0.00 | 3.44 ± 2.07 | 1.52 ± 0.25 | 0.77 ± 0.04 | 3.34 ± 1.37 | 0.94 ± 0.16 | 7.16 ± 4.31 | 1.20 ± 0.22 |
| AQP3 | 1.00 ± 0.00 | 1.44 ± 0.28 | 1.22 ± 0.18 | 1.18 ± 0.08 | 4.02 ± 1.04 ***** | 1.86 ± 0.43 | 3.70 ± 1.69 **#** | 1.19 ± 0.18 |
| AQP5 | 1.00 ± 0.00 | 2.26 ± 0.99 | 1.09 ± 0.12 | 0.70 ± 0.07 | 1.01 ± 0.24 | 0.31 ± 0.05 | 2.28 ± 1.12 | 0.64 ± 0.13 |
| AQP10 | 1.00 ± 0.00 | 3.76 ± 2.29 | 0.31 ± 0.13 | 0.05 ± 0.01 | 7.94 ± 2.46 | 2.05 ± 0.25 | 23.54 ± 14.40 | 2.29 ± 0.14 |
| AQP11 | 1.00 ± 0.00 | 1.22 ± 0.24 | 1.16 ± 0.15 | 0.81 ± 0.13 | 1.40 ± 0.32 | 0.58 ± 0.05 | 2.64 ± 1.00 | 0.77 ± 0.09 |
| MUC1A | 1.00 ± 0.00 | 2.02 ± 0.74 | 0.92 ± 0.17 | 0.59 ± 0.13 | 1.64 ± 0.46 | 0.56 ± 0.08 | 2.27 ± 1.06 | 0.61 ± 0.08 |
| MUC1B | 1.00 ± 0.00 | 2.35 ± 0.96 | 1.06 ± 0.18 | 0.54 ± 0.06 | 1.41 ± 0.31 | 0.54 ± 0.06 | 3.23 ± 1.64 | 0.78 ± 0.18 |
| MUC18 | 1.00 ± 0.00 | 2.66 ± 1.35 | 1.70 ± 0.26 | 1.52 ± 0.11 | 2.34 ± 0.66 | 0.75 ± 0.11 | 5.78 ± 3.67 | 0.81 ± 0.14 |
| MUC20 | 1.00 ± 0.00 | 3.31 ± 2.04 | 1.96 ± 0.59 | 1.10 ± 0.17 | 2.11 ± 0.77 | 0.58 ± 0.04 | 4.86 ± 2.93 | 0.80 ± 0.16 |
| e-cadherin | 1.00 ± 0.00 | 1.03 ± 0.05 | 1.47 ± 0.32 | 1.12 ± 0.29 | 4.38 ± 1.13 ***** | 1.62 ± 0.16 | 4.17 ± 1.53 **#** | 1.34 ± 0.16 |
| b catenin tv1-3 | 1.00 ± 0.00 | 1.84 ± 0.66 | 0.97 ± 0.05 | 0.86 ± 0.07 | 2.57 ± 0.56 | 1.09 ± 0.07 | 3.54 ± 1.24 **#$** | 1.36 ± 0.19 |
| vimentin1 | 1.00 ± 0.00 | 2.55 ± 1.29 | 1.52 ± 0.34 | 1.11 ± 0.16 | 6.92 ± 3.06 | 1.59 ± 0.20 | 8.30 ± 4.77 | 1.48 ± 0.23 |
| Fibronectin | 1.00 ± 0.00 | 0.89 ± 0.16 | 1.35 ± 0.12 | 1.08 ± 0.09 | 2.01 ± 0.61 | 1.12 ± 0.11 | 2.05 ± 0.76 | 1.03 ± 0.11 |
| S100A4 tv1 | 1.00 ± 0.00 | 0.81 ± 0.18 | 1.12 ± 0.10 | 1.04 ± 0.05 | 0.91 ± 0.28 | 0.71 ± 0.05 | 1.95 ± 0.80 | 1.01 ± 0.18 |
| S100A4 tv2 | 1.00 ± 0.00 | 0.75 ± 0.20 | 0.68 ± 0.11 | 0.66 ± 0.10 | 1.65 ± 0.58 | 1.35 ± 0.11 | 3.57 ± 1.64 **#** | 2.61 ± 0.41 |
| ABCA1 | 1.00 ± 0.00 | 1.72 ± 0.64 | 0.66 ± 0.27 | 0.78 ± 0.35 | 2.26 ± 0.60 | 1.27 ± 0.19 | 6.15 ± 3.63 | 1.26 ± 0.24 |
| ABCA7 | 1.00 ± 0.00 | 0.75 ± 0.18 | 0.82 ± 0.25 | 0.57 ± 0.16 | 1.24 ± 0.39 | 1.12 ± 0.05 | 2.28 ± 1.22 **#** | 1.58 ± 0.21 |
| ApoE | 1.00 ± 0.00 | 1.63 ± 0.66 | 0.79 ± 0.23 | 0.87 ± 0.22 | 1.93 ± 0.50 | 1.10 ± 0.11 | 4.98 ± 2.45 | 1.25 ± 0.18 |
| hRAR a TV1-4 | 1.00 ± 0.00 | 5.84 ± 4.13 | 2.64 ± 0.83 | 1.33 ± 0.15 | 1.87 ± 0.74 | 1.06 ± 0.22 | 2.96 ± 1.14 | 0.60 ± 0.18 |
| hRAR b Tva | 1.00 ± 0.00 | 0.74 ± 0.19 | 0.83 ± 0.27 | 0.68 ± 0.20 | 1.77 ± 0.61 | 1.67 ± 0.06 | 2.49 ± 1.26 **#** | 1.56 ± 0.16 |
| hRAR b Tvb | 1.00 ± 0.00 | 1.31 ± 0.35 | 0.82 ± 0.26 | 1.11 ± 0.26 | 2.80 ± 0.61 | 1.56 ± 0.14 | 5.98 ± 2.77 **#** | 1.67 ± 0.28 |
| hRxR a TV1 | 1.00 ± 0.00 | 0.65 ± 0.21 | 0.72 ± 0.27 | 0.49 ± 0.17 | 0.61 ± 0.17 | 1.67 ± 0.36 | 1.91 ± 0.62 **#** | 1.76 ± 0.44 ***~*** |
| hRxR b TV2 | 1.00 ± 0.00 | 0.79 ± 0.07 | 0.71 ± 0.22 | 0.39 ± 0.11 | 1.28 ± 0.42 | 1.09 ± 0.08 | 2.75 ± 1.02 **#** | 1.38 ± 0.12 |
| MFSD2A | 1.00 ± 0.00 | 1.06 ± 0.26 | 0.85 ± 0.25 | 1.50 ± 0.39 | 1.02 ± 0.26 | 0.62 ± 0.07 | 3.07 ± 1.36 | 0.91 ± 0.21 |
| Pecam-1 | 1.00 ± 0.00 | 1.29 ± 0.55 | 1.97 ± 0.56 | 1.19 ± 0.58 | 0.27 ± 0.10 | 0.52 ± 0.23 | 2.52 ± 0.70 | 1.14 ± 0.36 |
| RAGE | 1.00 ± 0.00 | 2.95 ± 1.71 | 0.73 ± 0.21 | 0.80 ± 0.24 | 2.46 ± 0.50 | 1.05 ± 0.15 | 7.47 ± 4.79 | 1.33 ± 0.36 |

Supplementary table 13: Average values of x-fold changes in protein secretion levels in the apical and basolateral medium supernatants of triple-cultures after 6h or 24h under normoxic conditions as well as after 6h OGD and 6h OGD followed by an 18h recovery phase under normoxic conditions with restored glucose levels normalized to the protein secretion levels of triple-cultures after 6h under normoxic conditions. Values are given as x-fold ± SEM. N=4, n=1-3, two-way ANOVA with all pairwise multiple comparison Holm-Sidak in case of non-normality distribution or non-equal variances, p-value=0.05, * significant against 6h normoxia hAP, § significant against 24h normoxia hAP, # significant against 6h OGD hAP. () indicates a trending regulation. For trending regulations: p< 0.075; n.d. not detectable; (n=1) indicates targets that were detect in only one sample

|  | apical | | | | basolateral | | | |
| --- | --- | --- | --- | --- | --- | --- | --- | --- |
| Normoxia hAP  6h | OGD hAP  6h | Normoxia hAP 24h | 6h OGD hAP  + 18h OGR | Normoxia hAP  6h | OGD hAP  6h | Normoxia hAP 24h | 6h OGD hAP  + 18h OGR |
| TNFRSF14 | n.d. | n.d. | n.d. | n.d. | 1.00 ± 0.00 | 1.13 ± 0.08 | 2.66 ± 0.02 * | 2.16 ± 0.02 **§#** |
| LDL receptor | 1.00 ± 0.00 | 1.51 ± 0.07 | 2.67 ± 0.18 * | 2.57 ± 0.26 **#** | 1.00 ± 0.00 | 0.81 ± 0.10 | 1.56 ± 0.05 * | 1.30 ± 0.06 **§#** |
| ITGB2 | 1.00 ± 0.00 | 2.98 ± 0.43 * | 1.65 ± 0.35 | 1.63 ± 0.29 **#** | n.d. | n.d. | n.d. | n.d. |
| IL-17RA | 1.00 ± 0.00 | 1.66 ± 0.10 * | 1.79 ± 0.28 * | 1.80 ± 0.07 | 1.00 ± 0.00 | 1.05 ± 0.05 | 2.29 ± 0.18 * | 2.08 ± 0.12 **#** |
| TNF-R2 | n.d. | n.d. | n.d. | n.d. | 1.00 ± 0.00 | 1.24 ± 0.13 | 1.85 ± 0.01 * | 1.58 ± 0.08 (**§)#** |
| MMP-9 | 1.00 ± 0.00 | 1.05 ± 0.05 | 2.72 ± 0.41 * | 2.95 ± 0.58 **#** | 1.00 ± 0.00 | 0.81 ± 0.12 | 1.29 ± 0.04 | 1.40 ± 0.15 **#** |
| EPHB4 | 1.00 ± 0.00 | 1.78 ± 0.22 | 3.58 ± 0.26 * | 3.63 ± 0.91 (**#)** | 1.00 ± 0.00 | 1.22 ± 0.10 | 3.20 ± 0.19 * | 2.57 ± 0.14 **§#** |
| IL2-RA | 1.00 ± 0.00 | 1.02 ± 0.08 | 1.08 ± 0.09 | 1.01 ± 0.04 | 1.00 ± 0.00 | 1.14 ± 0.05 | 1.10 ± 0.03 | 1.13 ± 0.03 |
| OPG | 1.00 ± 0.00 | 1.44 ± 0.29 | 2.20 ± 0.07 * | 2.98 ± 0.25 **§#** | 1.00 ± 0.00 | 0.64 ± 0.06 | 2.06 ± 0.16 | 6.51 ± 1.20 **§#** |
| ALCAM | 1.00 ± 0.00 | 1.97 ± 0.13 * | 2.32 ± 0.03 * | 2.52 ± 0.31 | 1.00 ± 0.00 | 1.00 ± 0.10 | 2.31 ± 0.07 * | 2.14 ± 0.08 **#** |
| TFF3 | n.d. | n.d. | n.d. | n.d. | 1.00 ± 0.00 | 0.64 ± 0.04 * | 2.65 ± 0.12 * | 1.46 ± 0.03 **§#** |
| SELP | n.d. | n.d. | n.d. | n.d. | 1.00 ± 0.00 | 0.90 ± 0.06 | 1.55 ± 0.13 | 1.01 ± 0.04 |
| CSTB | 1.00 ± 0.00 | 2.66 ± 0.59 | 2.56 ± 0.36 | 3.85 ± 1.44 | 1.00 ± 0.00 | 1.28 ± 0.23 | 3.27 ± 0.37 * | 3.29 ± 0.27 **#** |
| MCP-1 | 1.00 ± 0.00 | 1.13 ± 0.30 | 3.87 ± 0.36 (*) | 7.00 ± 1.38 **§#** | 1.00 ± 0.00 | 0.60 ± 0.09 | 7.09 ± 0.44 * | 6.78 ± 0.67 **#** |
| CD163 | 1.00 ± 0.00 | 0.96 ± 0.00  (n=1) | 1.03 ± 0.06 | n.d. | n.d. | n.d. | n.d. | n.d. |
| Gal-3 | 1.00 ± 0.00 | 2.50 ± 0.28 * | 2.42 ± 0.07 * | 3.29 ± 0.60 | 1.00 ± 0.00 | 1.18 ± 0.24 | 3.63 ± 0.43 * | 3.81 ± 0.31 **#** |
| GRN | 1.00 ± 0.00 | 2.55 ± 0.31 | 1.95 ± 0.09 | 5.90 ± 1.46 **§#** | 1.00 ± 0.00 | 2.97 ± 0.31 * | 4.22 ± 0.21 * | 7.43 ± 0.64 **§#** |
| NT-pro BNP | 1.00 ± 0.00 | 1.04 ± 0.09 | 4.57 ± 0.36 * | 2.33 ± 0.67 **§(#)** | 1.00 ± 0.00 | 0.82 ± 0.05 | 2.83 ± 0.34 * | 1.49 ± 0.20 **§(#)** |
| BLM hydrolase | 1.00 ± 0.00 | 1.16 ± 0.09 | 1.31 ± 0.04 | 1.49 ± 0.18 | 1.00 ± 0.00 | 0.93 ± 0.13 | 2.13 ± 0.06 * | 2.22 ± 0.04 **#** |
| PLC | 1.00 ± 0.00 | 1.93 ± 0.26 | 3.67 ± 0.49 * | 3.43 ± 0.95 | 1.00 ± 0.00 | 0.83 ± 0.05 | 2.05 ± 0.20 * | 1.62 ± 0.14 (**§)#** |
| LTBR | 1.00 ± 0.00 | 2.08 ± 0.28 | 1.80 ± 0.19 | 1.95 ± 0.28 | 1.00 ± 0.00 | 1.16 ± 0.10 | 2.75 ± 0.19 * | 2.48 ± 0.17 **#** |
| Notch 3 | 1.00 ± 0.00 | 1.61 ± 0.20 | 3.05 ± 0.25 * | 2.73 ± 0.23 **#** | 1.00 ± 0.00 | 1.36 ± 0.06 * | 2.61 ± 0.09 * | 1.98 ± 0.11 **§#** |
| TIMP4 | 1.00 ± 0.00 | 1.23 ± 0.00 | 1.91 ± 0.02 (*) | 2.13 ± 0.28 | 1.00 ± 0.00 | 0.52 ± 0.05 | 4.50 ± 0.39 * | 3.85 ± 0.27 **#** |
| CNTN1 | 1.00 ± 0.00 | 1.08 ± 0.09 | 2.80 ± 0.34 * | 2.51 ± 0.21 **#** | 1.00 ± 0.00 | n.d. | n.d. | 1.05 ± 0.00 (n=1) |
| CDH5 | 1.00 ± 0.00 (n=1) | 0.95 ± 0.00 (n=1) | 1.15 ± 0.00 (n=1) | 1.15 ± 0.00 (n=1) | n.d. | n.d. | n.d. | n.d. |
| TLT-2 | 1.00 ± 0.00 (n=1) | 1.32 ± 0.00 (n=1) | n.d. | n.d. | n.d. | n.d. | n.d. | n.d. |
| FABP4 | n.d. | n.d. | n.d. | n.d. | 1.00 ± 0.00 (n=1) | 0.85 ± 0.00 (n=1) | 1.75 ± 0.00 (n=1) | 2.00 ± 0.00 (n=1) |
| TFPI | 1.00 ± 0.00 | 2.01 ± 0.24 | 2.53 ± 0.13 | 4.02 ± 0.94 **#** | 1.00 ± 0.00 | 0.88 ± 0.17 | 3.41 ± 0.69 * | 3.31 ± 0.58 **#** |
| PAI-1 | 1.00 ± 0.00 | 1.82 ± 0.09 | 3.24 ± 0.68 * | 3.78 ± 0.78 (**#)** | 1.00 ± 0.00 | 1.14 ± 0.01 * | 0.80 ± 0.01 * | 0.85 ± 0.03 **#** |
| CCL24 | 1.00 ± 0.00 | 0.97 ± 0.00 (n=1) | 1.02 ± 0.04 | 1.08 ± 0.00 (n=1) | 1.00 ± 0.00 (n=1) | n.d. | 1.09 ± 0.00 (n=1) | 1.33 ± 0.00 (n=1) |
| TR | 1.00 ± 0.00 | 2.06 ± 0.24 * | 1.51 ± 0.12 | 1.73 ± 0.25 | 1.00 ± 0.00 | 0.96 ± 0.07 | 2.05 ± 0.20 * | 2.01 ± 0.18 **#** |
| TNFRSF10C | 1.00 ± 0.00 | 1.65 ± 0.14 * | 2.30 ± 0.03 * | 2.30 ± 0.20 **#** | 1.00 ± 0.00 | 1.23 ± 0.10 | 2.13 ± 0.09 * | 2.19 ± 0.12 **#** |
| GDF-15 | 1.00 ± 0.00 | 2.05 ± 0.34 | 3.48 ± 0.44 | 6.11 ± 2.24 (**#)** | 1.00 ± 0.00 | 1.08 ± 0.15 | 3.81 ± 0.47 (*) | 7.16 ± 1.50 **§#** |
| SELE | 1.00 ± 0.00 | 1.31 ± 0.20 | 1.29 ± 0.03 | 1.20 ± 0.13 | 1.00 ± 0.00 | 1.10 ± 0.10 | 1.10 ± 0.07 | 1.18 ± 0.10 |
| DLK-1 | 1.00 ± 0.00 | 1.49 ± 0.23 | 2.80 ± 0.35 * | 1.88 ± 0.22 (**§)** | 1.00 ± 0.00 | 0.74 ± 0.10 | 4.87 ± 0.66 * | 2.02 ± 0.17 **§(#)** |
| CXCL16 | 1.00 ± 0.00 | 1.23 ± 0.19 | 2.84 ± 0.16 * | 3.12 ± 0.85 **#** | 1.00 ± 0.00 | 0.79 ± 0.09 | 2.79 ± 0.26 * | 2.61 ± 0.22 **#** |
| IL-6RA | 1.00 ± 0.00 | 1.26 ± 0.10 | 2.20 ± 0.16 * | 2.43 ± 0.42 **#** | 1.00 ± 0.00 | 0.85 ± 0.06 | 2.15 ± 0.07 * | 2.19 ± 0.11 **#** |
| IGFBP-1 | 1.00 ± 0.00 (n=1) | 1.53 ± 0.00 (n=1) | 1.12 ± 0.00 (n=1) | 1.82 ± 0.00 (n=1) | 1.00 ± 0.00 | 1.42 ± 0.38 | 1.74 ± 0.42 | 1.90 ± 0.64 |
| TR-AP | 1.00 ± 0.00 | 2.35 ± 0.18 * | 1.33 ± 0.06 | 4.20 ± 0.36 **§#** | 1.00 ± 0.00 | 0.88 ± 0.06 | 4.23 ± 0.13 * | 3.26 ± 0.08 **§#** |
| MMP-2 | 1.00 ± 0.00 | 1.27 ± 0.17 | 4.46 ± 0.25 * | 3.06 ± 0.21 **§#** | 1.00 ± 0.00 | 0.35 ± 0.03 | 5.37 ± 0.46 * | 2.61 ± 0.30 **§#** |
| Ep-CAM | 1.00 ± 0.00 | 1.88 ± 0.35 | 1.57 ± 0.03 | 1.94 ± 0.46 | 1.00 ± 0.00 | 1.22 ± 0.14 | 3.94 ± 0.68 * | 2.88 ± 0.06 **#** |
| AP-N | 1.00 ± 0.00 | 1.39 ± 0.15 | 1.43 ± 0.06 | 1.27 ± 0.14 | 1.00 ± 0.00 | 0.87 ± 0.11 | 2.26 ± 0.19 * | 2.39 ± 0.13 **#** |
| AXL | 1.00 ± 0.00 | 1.41 ± 0.16 | 3.26 ± 0.15 * | 2.84 ± 0.49 **#** | 1.00 ± 0.00 | 0.79 ± 0.03 * | 2.31 ± 0.02 * | 1.39 ± 0.03 **§#** |
| IL-1RT1 | n.d. | n.d. | n.d. | n.d. | 1.00 ± 0.00 | 1.68 ± 0.14 * | 3.89 ± 0.11 * | 2.99 ± 0.14 **§#** |
| FAS | 1.00 ± 0.00 | 2.68 ± 0.36 * | 2.52 ± 0.13 * | 2.86 ± 0.56 | 1.00 ± 0.00 | 0.89 ± 0.08 | 2.74 ± 0.18 * | 3.01 ± 0.17 **#** |
| TNFSF13B | n.d. | n.d. | n.d. | n.d. | 1.00 ± 0.00 | 1.06 ± 0.12 | 7.68 ± 1.94 * | 11.39 ± 2.46 **#** |
| PCSK9 | 1.00 ± 0.00 (n=1) | 1.09 ± 0.00 (n=1) | 0.87 ± 0.00 (n=1) | n.d. | 1.00 ± 0.00 | 0.80 ± 0.07 | 3.95 ± 0.44 * | 3.16 ± 0.45 **#** |
| Gal4 | 1.00 ± 0.00 (n=1) | 0.74 ± 0.00 (n=1) | 0.84 ± 0.00 (n=1) | n.d. | n.d. | n.d. | n.d. | n.d. |
| OPN | 1.00 ± 0.00 | 0.68 ± 0.06 | 1.81 ± 0.36 (*) | 1.58 ± 0.20 **#** | 1.00 ± 0.00 | 0.61 ± 0.13 | 3.08 ± 0.52 (*) | 4.76 ± 0.93 **#** |
| CTSD | 1.00 ± 0.00 | 2.45 ± 0.52 | 1.38 ± 0.06 | 2.78 ± 0.95 | 1.00 ± 0.00 | 1.73 ± 0.24 (*) | 2.91 ± 0.10 | 4.99 ± 0.31 **§#** |
| CPA1 | 1.00 ± 0.00 | 0.97 ± 0.00 (n=1) | 1.80 ± 0.36 | 1.06 ± 0.06 | 1.00 ± 0.00 | 0.87 ± 0.01 | 5.03 ± 0.25 * | 1.99 ± 0.24 **§#** |
| JAM-A | 1.00 ± 0.00 | 2.52 ± 0.45 | 2.54 ± 0.09 | 3.34 ± 0.87 | 1.00 ± 0.00 | 1.62 ± 0.15 | 3.59 ± 0.24 * | 2.86 ± 0.26 (**§)#** |
| SHPS-1 | 1.00 ± 0.00 | 1.52 ± 0.31 | 2.28 ± 0.09 * | 2.07 ± 0.16 | 1.00 ± 0.00 | 1.16 ± 0.05 | 1.79 ± 0.07 * | 1.68 ± 0.07 **#** |
| CCL15 | 1.00 ± 0.00 | 1.24 ± 0.12 | 1.26 ± 0.07 | 1.25 ± 0.01 | 1.00 ± 0.00 | 0.99 ± 0.07 | 2.69 ± 0.52 * | 1.37 ± 0.21 **§** |
| CASP-3 | 1.00 ± 0.00 | 2.16 ± 0.22 | 1.84 ± 0.08 | 2.65 ± 0.68 | 1.00 ± 0.00 | 1.43 ± 0.31 | 2.32 ± 0.28 * | 2.35 ± 0.25 (**#)** |
| uPA | 1.00 ± 0.00 | 1.91 ± 0.24 | 2.89 ± 0.30 | 5.00 ± 1.38 **#** | 1.00 ± 0.00 | 0.92 ± 0.16 | 7.69 ± 1.34 * | 9.79 ± 1.96 **#** |
| IGFBP-7 | 1.00 ± 0.00 | 2.55 ± 0.24 | 8.14 ± 2.76 | 13.93 ± 4.18 **#** | 1.00 ± 0.00 | 0.79 ± 0.04 * | 0.87 ± 0.03 * | 0.93 ± 0.02 **#** |
| CHI3L1 | 1.00 ± 0.00 (n=1) | n.d. | 0.66 ± 0.00 (n=1) | n.d. | 1.00 ± 0.00 | 0.71 ± 0.05 (*) | 2.31 ± 0.14 * | 1.65 ± 0.05 **§#** |
| ST2 | 1.00 ± 0.00 (n=1) | 1.22 ± 0.00 (n=1) | 1.10 ± 0.00 (n=1) | 0.95 ± 0.00 (n=1) | 1.00 ± 0.00 | 0.54 ± 0.04 * | 0.92 ± 0.05 | 0.95 ± 0.08 **#** |
| t-PA | 1.00 ± 0.00 | 2.58 ± 0.43 | 2.09 ± 0.06 | 3.57 ± 0.94 | 1.00 ± 0.00 | 0.87 ± 0.10 | 3.28 ± 0.69 | 6.69 ± 1.67 (**§)#** |
| SCGB3A2 | 1.00 ± 0.00 | 0.97 ± 0.01 | 1.04 ± 0.04 | 0.91 ± 0.02 | 1.00 ± 0.00 (n=1) | 1.03 ± 0.00 (n=1) | n.d. | n.d. |
| EGFR | 1.00 ± 0.00 | 1.46 ± 0.10 | 1.42 ± 0.06 | 1.42 ± 0.04 | 1.00 ± 0.00 | 1.11 ± 0.09 | 1.62 ± 0.06 * | 1.82 ± 0.06 **#** |
| CD93 | 1.00 ± 0.00 | 1.39 ± 0.04 | 1.72 ± 0.06 | 1.89 ± 0.14 | 1.00 ± 0.00 | 1.17 ± 0.06 | 2.23 ± 0.09 * | 1.58 ± 0.11 **§#** |
| IL-18BP | 1.00 ± 0.00 | 1.03 ± 0.00 (n=1) | 1.03 ± 0.13 | 0.97 ± 0.03 | 1.00 ± 0.00 | 0.87 ± 0.03 | 1.90 ± 0.17 * | 1.51 ± 0.04 **§#** |
| COL1A1 | 1.00 ± 0.00 | 1.82 ± 0.22 | 3.15 ± 0.77 (*) | 3.56 ± 0.82 | 1.00 ± 0.00 | 1.61 ± 0.08 * | 0.60 ± 0.03 * | 0.79 ± 0.05 (**§)#** |
| CTSZ | 1.00 ± 0.00 | 1.58 ± 0.10 | 2.01 ± 0.04 (*) | 3.60 ± 0.56 **§#** | 1.00 ± 0.00 | 1.16 ± 0.07 | 2.24 ± 0.11 * | 2.58 ± 0.15 (**§)#** |
| IGFBP-2 | 1.00 ± 0.00 | 1.16 ± 0.20 | 3.83 ± 0.58 | 5.40 ± 1.88 **#** | 1.00 ± 0.00 | 0.39 ± 0.09 | 6.23 ± 1.02 * | 4.69 ± 0.83 **#** |
| RARRES2 | 1.00 ± 0.00 | 2.08 ± 0.34 | 4.83 ± 0.19 | 15.09 ± 5.95 | 1.00 ± 0.00 | 0.54 ± 0.09 | 22.74 ± 5.42 * | 28.00 ± 8.14 **#** |
| ICAM-2 | 1.00 ± 0.00 | 1.01 ± 0.01 | 1.39 ± 0.00 (n=1) | 1.08 ± 0.01 | 1.00 ± 0.00 | 0.97 ± 0.02 | 1.10 ± 0.08 | 1.13 ± 0.06 |
| KLK6 | 1.00 ± 0.00 | 0.71 ± 0.10 | 4.37 ± 0.43 * | 3.99 ± 0.65 **#** | 1.00 ± 0.00 | 0.54 ± 0.04 * | 3.33 ± 0.04 * | 3.59 ± 0.10 **§#** |
| PDGF subunit A | 1.00 ± 0.00 | 1.03 ± 0.11 | 3.13 ± 0.02 * | 2.86 ± 0.54 **#** | 1.00 ± 0.00 | 0.74 ± 0.17 | 0.98 ± 0.08 | 0.83 ± 0.10 |
| TNF-R1 | 1.00 ± 0.00 | 1.32 ± 0.19 | 3.07 ± 0.09 * | 2.73 ± 0.36 **#** | 1.00 ± 0.00 | 1.19 ± 0.11 | 2.68 ± 0.06 * | 1.84 ± 0.07 **§#** |
| vWF | 1.00 ± 0.00 (n=1) | 0.94 ± 0.00 (n=1) | 0.66 ± 0.00 (n=1) | 0.72 ± 0.00 (n=1) | 1.00 ± 0.00 (n=1) | 0.89 ± 0.00 (n=1) | 0.97 ± 0.00 (n=1) | n.d. |
| PECAM-1 | 1.00 ± 0.00 | 0.98 ± 0.08 | 1.03 ± 0.02 | 0.74 ± 0.00 (n=1) | 1.00 ± 0.00 | 1.06 ± 0.08 | 2.39 ± 0.10 * | 2.43 ± 0.23 **#** |

Supplementary table 14: mRNA levels of contusional total brain samples were put into relation to corresponding contralateral brain samples (x-fold). N=1. n=1, normalized to endogenous control B2M.

| Target/sample | TBI  + 0h survival | TBI  + 4h survival | TBI  + 7h survival | TBI  + 21h survival | TBI  + 48h survival |
| --- | --- | --- | --- | --- | --- |
| CLDN-1 | 1.01 | 0.83 | 0.16 | 762.93 | 0.30 |
| CLDN-2 | 0.40 | n.d. | 2.26 | n.d. | n.d. |
| CLDN-3 | n.d. | n.d. | 2.62 | 0.41 | 3.83 |
| CLDN-4 | 0.02 | 115.95 | 0.71 | n.d. | 0.13 |
| CLDN-5 | 0.71 | 1.45 | 0.14 | 0.67 | 0.45 |
| CLDN-6 | 0.04 | 18.10 | 1.78 | 1.15 | 0.17 |
| CLDN-8 | 0.01 | 28.20 | 3.06 | 4.65 | 0.18 |
| CLDN-9 | n.d. | 170.37 | 2.57 | 1.58 | n.d. |
| CLDN-10 tva | 0.01 | 35.23 | 3.42 | 90.75 | 0.11 |
| CLDN-10 tvb | 1.34 | 2.50 | 0.52 | 0.80 | 0.56 |
| CLDN-11 | 0.15 | 5.45 | 4.95 | 0.83 | 0.32 |
| CLDN-12 tv1 | 0.80 | n.d. | n.d. | 0.66 | 0.89 |
| CLDN-12 tv2 | 1.35 | 1.13 | n.d. | 4.30 | 0.18 |
| CLDN-12 tv3 | 1.19 | 0.74 | 0.10 | 0.67 | 0.74 |
| CLDN-14 | n.d. | 39.37 | 0.69 | 0.66 | n.d. |
| CLDN-15 | 0.12 | 1.01 | 0.54 | 1.47 | 1.43 |
| CLDN-16 | n.d. | n.d. | 1.41 | 0.59 | 0.44 |
| CLDN-17 | 0.01 | 56.60 | 2.27 | 0.91 | 0.23 |
| CLDN-18 | 0.03 | 38.59 | 2.55 | 0.64 | 1.05 |
| CLDN-20 | n.d. | 0.08 | n.d. | n.d. | n.d. |
| CLDN-21 | n.d. | 112.55 | 1.11 | 1.50 | 0.24 |
| CLDN-22 | n.d. | n.d. | 0.62 | n.d. | n.d. |
| CLDN-23 | n.d. | n.d. | 3.22 | n.d. | n.d. |
| CLDN-24 | n.d. | 143.18 | 0.74 | 1.37 | n.d. |
| CLDN-25 | 0.23 | 6.64 | 0.01 | 0.52 | n.d. |
| JAM-1 | 1.13 | n.d. | 0.17 | 1.33 | 0.14 |
| JAM-2 | 1.31 | 1.27 | 0.38 | 0.24 | 0.48 |
| JAM-3 | 0.71 | 4.25 | 0.41 | 0.56 | 0.14 |
| ZO-1 | 0.71 | 3.29 | 0.58 | 0.61 | 0.28 |
| ZO-2 | 0.69 | 1.94 | 1.55 | 0.62 | 0.58 |
| ZO-3 | n.d. | n.d. | n.d. | n.d. | 0.21 |
| vWF | 1.16 | 0.27 | 0.04 | 0.67 | 0.10 |
| GLUT-1 | 1.22 | 0.50 | 0.12 | 0.64 | 0.45 |
| Occludin | n.d. | n.d. | n.d. | 0.27 | n.d. |
| CDH5 | 1.83 | 0.44 | 0.20 | 0.69 | 0.48 |
| ABCB1 | 1.93 | 0.28 | 0.10 | 0.65 | 0.40 |
| MRP-1 | 5.26 | 0.33 | 0.04 | 0.89 | 0.30 |
| MRP-2 | n.d. | n.d. | 4.58 | 0.72 | n.d. |
| MRP-3 | n.d. | n.d. | n.d. | n.d. | 0.15 |
| MRP-4 | 1.38 | 0.77 | 0.25 | 1.28 | 0.41 |
| MRP-5 | 3.59 | n.d. | 0.01 | 0.57 | 1.03 |
| BCRP | 2.12 | 0.13 | 0.05 | 0.38 | 0.45 |
| Marveld2 (tricellulin) | 2.92 | 0.33 | 0.30 | 0.55 | 1.23 |
| CAT-1 | 0.93 | 2.60 | 0.37 | 0.71 | 0.82 |
| CAT-3 | / | 9.99 | 1.01 | 0.61 | 0.23 |
| ENT-1 | 2.84 | 0.18 | 0.03 | 0.70 | 0.31 |
| InR | 2.32 | 0.44 | 0.06 | 0.62 | 0.33 |
| LAT-1 | 1.63 | 0.09 | 0.04 | 0.42 | 0.08 |
| LRP-1 | 1.59 | 0.24 | 0.05 | 0.79 | 0.56 |
| LRP-8 | 4.03 | 0.30 | 0.04 | 0.72 | 0.39 |
| MCT-1 | 2.40 | 0.51 | 0.20 | 0.69 | 0.18 |
| MCT-8 | 0.68 | 0.52 | 0.17 | 0.80 | 0.41 |
| TfR | 1.50 | 0.75 | 0.10 | 0.68 | 0.32 |
| VEGF-A | 2.47 | 0.44 | 0.06 | 0.95 | 0.54 |
| WWC2 | 1.41 | 1.48 | 0.73 | 0.60 | 0.25 |
| CK8 | 0.30 | 6.65 | 1.16 | 0.84 | 0.05 |
| CK18 | n.d. | n.d. | 0.07 | 0.51 | n.d. |
| CK19 | n.d. | 7.34 | 4.02 | 12.24 | n.d. |
| AQP3 | 4.38 | 0.50 | 0.02 | 2.30 | 0.53 |
| AQP5 | 0.66 | 2.47 | 0.96 | 0.31 | 1.26 |
| AQP11 | 2.37 | n.d. | 0.25 | 0.74 | 0.49 |
| MUC1A | 1.99 | 41.86 | 3.02 | 2.69 | 0.08 |
| MUC1B | 0.07 | 7.25 | 2.12 | 6.73 | 0.05 |
| MUC18 | 0.97 | 0.99 | 0.71 | 0.46 | 0.47 |
| MUC20 | 1.67 | 0.27 | 0.09 | 0.75 | 0.15 |
| e-cadherin | 0.92 | 1.80 | 0.51 | 0.53 | 1.30 |
| b-catenin tv1-3 | 1.01 | 1.49 | 1.39 | 1.00 | 0.59 |
| vimentin1 | 1.41 | 0.82 | 0.30 | 1.37 | 0.62 |
| Fibronectin | 2.24 | 0.44 | 0.17 | 0.95 | 0.35 |
| S100A4 tv1 | 3.21 | n.d. | 0.29 | 0.77 | 0.65 |
| CLDN-27 | n.d. | 65.82 | n.d. | 0.57 | n.d. |
| MFSD2A | 1.99 | 0.30 | 0.01 | 0.57 | 0.04 |
| RAGE | 0.67 | 3.23 | 0.13 | 0.58 | 0.15 |
|  | | | | | |

Supplementary table 15: mRNA levels of contusional isolated capillaries were put into relation to corresponding contralateral isolated capillaries (x-fold). N=1. n=1, normalized to endogenous control B2M.

| Target/sample | TBI  + 0h survival | TBI  + 4h survival | TBI  + 7h survival | TBI  + 21h survival | TBI  + 48h survival |
| --- | --- | --- | --- | --- | --- |
| CLDN-1 | 1.30 | 1.82 | 0.21 | 13.96 | 10.82 |
| CLDN-2 | 2.33 | 1.52 | 0.44 | 3.27 | 0.47 |
| CLDN-3 | 0.44 | 2.97 | 0.97 | 10.27 | 0.86 |
| CLDN-4 | 1.85 | 1.41 | 0.80 | 6.21 | 0.59 |
| CLDN-5 | 0.29 | 0.55 | 0.25 | 0.87 | 0.88 |
| CLDN-6 | 2.90 | 2.83 | 1.10 | 2.95 | 0.60 |
| CLDN-8 | 2.02 | 7.42 | 0.93 | 4.93 | 0.47 |
| CLDN-9 | 3.25 | 10.61 | 1.34 | 5.08 | 2.79 |
| CLDN-10 tva | 2.66 | 5.52 | 0.90 | 3.74 | 0.42 |
| CLDN-10 tvb | 2.78 | 1.12 | 1.39 | 2.17 | 0.82 |
| CLDN-11 | 0.94 | 1.20 | 3.30 | 0.50 | 0.90 |
| CLDN-12 tv1 | 1.35 | n.d. | n.d. | 0.49 | n.d. |
| CLDN-12 tv2 | n.d. | n.d. | n.d. | 0.28 | n.d. |
| CLDN-12 tv3 | 0.56 | n.d. | n.d. | 0.89 | n.d. |
| CLDN-14 | 6.40 | 1.28 | 0.93 | 2.69 | 0.95 |
| CLDN-15 | 2.47 | 0.22 | 3.94 | 0.68 | 3.00 |
| CLDN-17 | 2.40 | 6.13 | 0.93 | 6.29 | 0.56 |
| CLDN-18 | 2.61 | 5.37 | 0.89 | 4.93 | 0.73 |
| CLDN-20 | 2.25 | 0.00 | n.d. | n.d. | 1.48 |
| CLDN-21 | 1.53 | 2.91 | 0.68 | 4.00 | 0.48 |
| CLDN-22 | 3.46 | 4.00 | 0.74 | 3.18 | 0.35 |
| CLDN-23 | 0.16 | 0.16 | n.d. | 0.35 | 0.35 |
| CLDN-24 | 2.92 | 11.54 | 0.78 | 2.50 | 0.50 |
| CLDN-25 | 0.71 | 0.66 | 1.01 | 5.60 | 0.21 |
| JAM-1 | 0.73 | 0.40 | 0.24 | 1.72 | 1.90 |
| JAM-2 | 0.94 | 1.03 | 4.31 | 0.51 | 0.58 |
| JAM-3 | 0.85 | 0.94 | 0.10 | 1.93 | 3.92 |
| ZO-1 | 0.20 | 0.61 | 0.04 | 0.88 | 2.82 |
| ZO-2 | 0.94 | 0.54 | 0.26 | 0.99 | 1.35 |
| vWF | 0.20 | 0.77 | 0.14 | 1.72 | 1.78 |
| GLUT-1 | 0.36 | 0.74 | 0.50 | 0.42 | 0.92 |
| CDH5 | 0.48 | 0.95 | 0.08 | 2.05 | 0.94 |
| ABCB1 | 0.25 | 0.53 | 0.05 | 0.65 | 1.67 |
| MRP-1 | n.d. | 1.22 | n.d. | 1.96 | 1.51 |
| MRP-2 | n.d. | n.d. | n.d. | 1.12 | n.d. |
| MRP-4 | 2.33 | 1.37 | 0.23 | 2.04 | 2.37 |
| MRP-5 | 0.20 | 0.22 | n.d. | 1.83 | 1.86 |
| BCRP | 0.30 | 0.43 | 0.24 | 0.54 | 2.72 |
| Marveld2 (tricellulin) | 1.17 | 0.66 | n.d. | 0.90 | 1.57 |
| CAT-1 | n.d. | 0.41 | 0.47 | 0.46 | 2.01 |
| CAT-3 | 1.22 | 6.61 | 1.16 | 11.39 | 0.49 |
| ENT-1 | 1.57 | 1.63 | 0.00 | 0.99 | 1.39 |
| InR | 0.36 | 0.54 | n.d. | 1.40 | 1.16 |
| LAT-1 | 0.17 | 0.55 | 0.03 | 0.93 | 1.57 |
| LRP-1 | 0.86 | 0.77 | 0.38 | 1.17 | 2.40 |
| LRP-8 | 0.64 | 0.79 | 0.01 | 0.87 | 2.49 |
| MCT-1 | 0.62 | 1.14 | 0.19 | 0.39 | 0.71 |
| MCT-8 | 0.33 | 0.27 | 0.61 | 0.70 | 2.15 |
| TfR | 0.28 | 0.55 | 0.24 | 0.43 | 1.36 |
| VEGF-A | 0.25 | 1.07 | 0.81 | 2.92 | 3.37 |
| WWC2 | 0.38 | 0.49 | 0.09 | 0.43 | 1.06 |
| CK8 | 1.98 | 2.82 | 0.55 | 4.39 | 0.47 |
| CK18 | n.d. | 0.31 | n.d. | 1.19 | 0.85 |
| CK19 | 3.22 | 2.40 | 0.58 | 2.42 | 0.71 |
| AQP3 | 6.97 | n.d. | 1.48 | 4.74 | 1.36 |
| AQP5 | n.d. | n.d. | n.d. | n.d. | 0.20 |
| AQP11 | n.d. | n.d. | n.d. | 1.28 | n.d. |
| MUC1A | 3.71 | 1.04 | 0.02 | 1.01 | 1.97 |
| MUC1B | 2.22 | 1.73 | 0.89 | 4.90 | 0.56 |
| MUC18 | 0.34 | 0.86 | 0.14 | 3.16 | 2.23 |
| MUC20 | 0.49 | 0.96 | n.d. | 2.09 | 1.37 |
| e-cadherin | n.d. | n.d. | n.d. | 0.97 | n.d. |
| b-catenin tv1-3 | 1.16 | 0.59 | 0.63 | 1.42 | 1.47 |
| vimentin1 | 1.36 | 0.87 | 0.22 | 1.09 | 0.90 |
| Fibronectin | 0.26 | 0.47 | 0.29 | 0.88 | 1.44 |
| S100A4 tv1 | 1.70 | 0.99 | 0.77 | 7.37 | 1.98 |
| S100A4 tv2 | n.d. | n.d. | n.d. | n.d. | 0.29 |
| CLDN-27 | 0.93 | 3.13 | 0.95 | 13.77 | 1.00 |
| MFSD2A | 0.09 | 0.44 | 0.03 | 1.08 | 2.38 |
| RAGE | 0.50 | 1.05 | 0.33 | 3.26 | 1.16 |
|  | | | | | |
|  | | | | | |
|  | | | | | |

Supplementary table 16: mRNA levels enrichments of isolated contralateral brain capillaries were put into relation to corresponding total contralateral brain samples for each patient with differing survival times (x-fold). N=1, n=1, normalized to endogenous control B2M.

| Target/sample | TBI  + 0h survival | TBI  + 4h survival | TBI  + 7h survival | TBI  + 21h survival | TBI  + 48h survival |
| --- | --- | --- | --- | --- | --- |
| CLDN-1 | 0.28 | 0.10 | 0.05 | 13.66 | 0.02 |
| CLDN-2 | 0.69 | n.d. | 3.77 | n.d. | 4.65 |
| CLDN-3 | 0.42 | n.d. | 7.32 | 1.12 | 29.44 |
| CLDN-4 | 0.32 | 17.72 | 3.06 | 1.14 | 7.61 |
| CLDN-5 | 4.30 | 3.87 | 1.91 | 6.78 | 3.63 |
| CLDN-6 | 0.53 | 3.69 | 2.36 | 1.54 | 13.39 |
| CLDN-8 | 1.11 | 5.65 | 7.81 | 63.65 | 46.98 |
| CLDN-9 | 0.57 | 12.64 | 3.02 | 0.76 | 30.47 |
| CLDN-10 tv a | 0.99 | 7.05 | 9.71 | 3315.81 | 47.22 |
| CLDN-10 tv b | 0.06 | 0.52 | 0.84 | 0.09 | 0.97 |
| CLDN-11 | 0.02 | 0.06 | 0.02 | 0.01 | 0.12 |
| CLDN-12 tv1 | 0.09 | n.d. | 0.06 | 0.11 | n.d. |
| CLDN-12 tv2 | 1.05 | n.d. | n.d. | 1.96 | n.d. |
| CLDN-12 tv3 | 0.40 | n.d. | 0.07 | 0.26 | n.d. |
| CLDN-14 | 0.14 | 3.33 | 4.79 | 1.55 | 62.74 |
| CLDN-15 | 0.78 | 2.32 | 0.30 | 1.32 | 0.08 |
| CLDN-16 | n.d. | n.d. | n.d. | n.d. | n.d. |
| CLDN-17 | 1.33 | 10.40 | 8.00 | 15.80 | 35.91 |
| CLDN-18 | 0.63 | 4.16 | 4.71 | 4.85 | 69.21 |
| CLDN-18 tv2 | n.d. | n.d. | 0.61 | n.d. | n.d. |
| CLDN-20 | n.d. | 2.39 | n.d. | n.d. | 269.43 |
| CLDN-21 | 0.72 | 26.42 | 13.80 | 21.68 | 60.16 |
| CLDN-22 | 0.55 | n.d. | 7.03 | n.d. | 236.54 |
| CLDN-23 | 13.93 | n.d. | 9.85 | n.d. | n.d. |
| CLDN-24 | 0.36 | 11.31 | 26.46 | 12.74 | n.d. |
| CLDN-25 | 0.02 | 0.04 | 0.05 | n.d. | 0.23 |
| CLDN-27 | 0.93 | 7.12 | 3.35 | 0.41 | n.d. |
| JAM-1 | 3.47 | 3.38 | 3.11 | 6.17 | 0.22 |
| JAM-2 | 0.07 | 0.20 | 0.12 | 1.14 | 0.46 |
| JAM-3 | 0.11 | 0.12 | 0.11 | 0.02 | 0.03 |
| ZO-1 | 0.25 | 0.33 | 0.34 | 0.12 | 0.16 |
| ZO-2 | 0.18 | 1.72 | 0.58 | 0.40 | 0.93 |
| ZO-3 | n.d. | n.d. | 0.46 | n.d. | 0.27 |
| vWF | 8.97 | 3.70 | 1.92 | 5.50 | 0.84 |
| GLUT-1 | 5.97 | 2.50 | 1.10 | 3.92 | 2.66 |
| occludin | n.d. | n.d. | n.d. | 0.04 | n.d. |
| CDH5 | 7.01 | 2.53 | 4.18 | 2.69 | 2.57 |
| ABCB1 | 8.57 | 2.58 | 1.65 | 3.32 | 0.61 |
| MRP-1 | 1.46 | 0.11 | 0.06 | 0.08 | 0.10 |
| MRP-2 | n.d. | 0.28 | n.d. | 0.52 | n.d. |
| MRP-3 | n.d. | n.d. | n.d. | n.d. | n.d. |
| MRP-4 | 0.24 | 0.70 | 1.93 | 2.44 | 0.32 |
| MRP-5 | 2.23 | 0.40 | 0.06 | 0.05 | 0.04 |
| BCRP | 6.18 | 3.00 | 1.95 | 4.29 | 0.63 |
| Marveld2 (tricellulin) | 9.04 | 2.84 | 3.11 | 3.76 | 1.43 |
| CAT-1 | 1.51 | 2.91 | 0.31 | 1.57 | 0.25 |
| CAT-3 | 0.80 | 1.48 | 5.52 | 0.16 | 7.67 |
| ENT-1 | 0.37 | 0.25 | 0.08 | 0.19 | 0.09 |
| InR | 1.24 | 0.90 | 0.76 | 0.39 | 0.45 |
| LAT-1 | 12.32 | 4.20 | 4.07 | 6.94 | 1.55 |
| LRP-1 | 0.27 | 0.14 | 0.04 | 0.04 | 0.04 |
| LRP-8 | 2.91 | 1.46 | 1.56 | 1.57 | 0.21 |
| MCT-1 | 0.67 | 0.79 | 1.30 | 2.26 | 0.46 |
| MCT-8 | 0.52 | 1.86 | 0.29 | 2.17 | 0.15 |
| TfR | 0.52 | 1.17 | 0.23 | 2.60 | 0.46 |
| VEGF-A | 0.16 | 0.28 | 0.02 | 0.19 | 0.19 |
| LSR | 5.98 | 1.90 | 3.07 | 5.30 | 0.83 |
| WWC2 | 0.27 | 0.65 | 0.52 | 0.54 | 0.19 |
| CK8 | 0.80 | 2.12 | 3.62 | 0.76 | 9.74 |
| CK18 | n.d. | 4.07 | 0.10 | 2.40 | n.d. |
| CK19 | 0.76 | 2.07 | 13.41 | 107.25 | 29.49 |
| AQP3 | 0.05 | n.d. | 0.02 | 0.07 | 0.03 |
| AQP5 | n.d. | n.d. | 0.07 | n.d. | 0.12 |
| AQP11 | n.d. | n.d. | 0.07 | 0.05 | n.d. |
| MUC1A | 0.59 | 24.93 | 25.62 | 35.81 | 4.14 |
| MUC1B | 0.69 | 2.95 | 2.67 | 4.32 | 8.29 |
| MUC18 | 2.60 | 1.59 | 2.09 | 0.47 | 1.12 |
| MUC20 | 0.44 | 0.27 | 0.19 | 0.10 | 0.11 |
| e-cadherin | n.d. | n.d. | n.d. | 0.05 | n.d. |
| b-catenin tv1-3 | 0.36 | 0.84 | 0.40 | 0.94 | 0.17 |
| vimentin1 | 0.38 | 1.03 | 0.43 | 1.39 | 1.08 |
| Fibronectin | 6.12 | 3.53 | 1.89 | 8.24 | 1.55 |
| S100A4 tv1 | 10.53 | n.d. | 1.23 | 0.41 | 1.31 |
| ABCA1 | 4.52 | 1.12 | 1.72 | 0.91 | 0.84 |
| ABCA7 | 11.46 | 0.56 | 0.28 | 0.10 | 0.02 |
| ApoE | 0.01 | n.d. | 0.02 | 0.01 | 0.14 |
| hRARb tva | 0.79 | n.d. | 0.10 | 0.16 | 0.03 |
| hRARb tvb | 2.16 | 1.77 | 4.60 | 0.97 | 5.70 |
| hRxRa | 0.26 | n.d. | 0.02 | 0.06 | 0.03 |
| hRxRb | 0.59 | 0.99 | 0.36 | 0.60 | 0.48 |
| MFSD2A | 25.45 | 3.43 | 4.03 | 7.74 | 2.31 |
| Pecam-1 | n.d. | 2.68 | 2.79 | 8.13 | 4.80 |
| RAGE | 4.71 | 3.27 | 2.67 | 0.85 | 7.40 |

Supplementary table 17: mRNA levels enrichment of isolated contusional brain capillaries were put into relation to corresponding total contusional brain samples for each patient with differing survival times (x-fold). N=1, n=1, normalized to endogenous control B2M.

| Target/sample | TBI  + 0h survival | TBI  + 4h survival | TBI  + 7h survival | TBI  + 21h survival | TBI  + 48h survival |
| --- | --- | --- | --- | --- | --- |
| CLDN-1 | 0.35 | 0.22 | 0.06 | 0.25 | 0.59 |
| CLDN-2 | 4.00 | 0.46 | 0.73 | 2.19 | n.d. |
| CLDN-3 | n.d. | 0.21 | 2.71 | 28.07 | 6.60 |
| CLDN-4 | 27.53 | 0.21 | 3.47 | n.d. | 34.53 |
| CLDN-5 | 1.74 | 1.46 | 3.45 | 8.80 | 7.08 |
| CLDN-6 | 35.30 | 0.58 | 1.45 | 3.94 | 48.12 |
| CLDN-8 | 325.90 | 1.48 | 2.38 | 67.46 | 125.66 |
| CLDN-9 | n.d. | 0.79 | 1.57 | 2.44 | n.d. |
| CLDN-10tva | 283.02 | 1.10 | 2.57 | 136.64 | 187.85 |
| CLDN-10tvb | 0.13 | 0.23 | 2.25 | 0.23 | 1.42 |
| CLDN-11 | 0.14 | 0.01 | 0.02 | n.d. | 0.33 |
| CLDN-12 tv1 | 0.16 | n.d. | n.d. | 0.08 | 0.01 |
| CLDN-12 tv2 | n.d. | n.d. | n.d. | 0.13 | 0.31 |
| CLDN-12 tv3 | 0.19 | 0.61 | n.d. | 0.35 | 0.07 |
| CLDN-14 | n.d. | 0.11 | 6.47 | 6.34 | n.d. |
| CLDN-15 | 16.58 | 0.50 | 2.20 | 0.61 | 0.17 |
| CLDN-16 | n.d. | n.d. | n.d. | 0.13 | 0.08 |
| CLDN-17 | 300.24 | 1.13 | 3.26 | 109.59 | 85.46 |
| CLDN-18 | 65.27 | 0.58 | 1.64 | 37.38 | 48.19 |
| CLDN-18 | n.d. | 0.08 | n.d. | n.d. | n.d. |
| CLDN-20 | n.d. | 0.12 | n.d. | n.d. | n.d. |
| CLDN-21 | n.d. | 0.68 | 8.44 | 57.76 | 118.95 |
| CLDN-22 | 9609.81 | 0.85 | 8.32 | n.d. | n.d. |
| CLDN-23 | n.d. | n.d. | n.d. | n.d. | n.d. |
| CLDN-24 | n.d. | 0.91 | 28.10 | 23.21 | n.d. |
| CLDN-25 | 0.05 | n.d. | 10.88 | 0.05 | n.d. |
| CLDN-27 | n.d. | 0.34 | n.d. | 9.95 | n.d. |
| JAM-1 | 2.25 | n.d. | 4.53 | 8.00 | 2.93 |
| JAM-2 | 0.05 | 0.16 | 1.40 | 2.42 | 0.55 |
| JAM-3 | 0.13 | 0.03 | 0.03 | 0.09 | 0.83 |
| ZO-1 | 0.07 | 0.06 | 0.02 | 0.17 | 1.66 |
| ZO-2 | 0.24 | 0.47 | 0.10 | 0.65 | 2.17 |
| ZO-3 | n.d. | n.d. | n.d. | n.d. | n.d. |
| vWF | 1.58 | 10.37 | 6.31 | 14.03 | 14.78 |
| GLUT-1 | 1.76 | 3.69 | 4.55 | 2.55 | 5.47 |
| occludin | n.d. | n.d. | n.d. | n.d. | n.d. |
| CDH5 | 1.83 | 5.45 | 1.68 | 7.95 | 5.05 |
| ABCB1 | 1.11 | 4.99 | 0.80 | 3.36 | 2.58 |
| MRP-1 | n.d. | 0.40 | n.d. | 0.19 | 0.52 |
| MRP-2 | n.d. | n.d. | n.d. | 0.81 | n.d. |
| MRP-3 | n.d. | n.d. | n.d. | n.d. | 0.27 |
| MRP-4 | 0.40 | 1.26 | 1.80 | 3.90 | 1.82 |
| MRP-5 | 0.12 | n.d. | n.d. | 0.17 | 0.08 |
| BCRP | 0.86 | 10.06 | 8.93 | 6.04 | 3.82 |
| Marveld2 (tricellulin) | 3.61 | 5.72 | n.d. | 6.08 | 1.82 |
| CAT-1 | n.d. | 0.45 | 0.39 | 1.03 | 0.63 |
| CAT-3 | n.d. | 0.98 | 6.35 | 2.97 | 16.09 |
| ENT-1 | 0.21 | 2.34 | n.d. | 0.27 | 0.42 |
| InR | 0.19 | 1.09 | n.d. | 0.87 | 1.59 |
| LAT-1 | 1.31 | 25.76 | 3.12 | 15.46 | 29.26 |
| LRP-1 | 0.15 | 0.44 | 0.27 | 0.07 | 0.18 |
| LRP-8 | 0.46 | 3.85 | 0.37 | 1.89 | 1.36 |
| MCT-1 | 0.17 | 1.76 | 1.23 | 1.29 | 1.80 |
| MCT-8 | 0.26 | 0.96 | 1.05 | 1.88 | 0.77 |
| TfR | 0.10 | 0.85 | 0.55 | 1.63 | 1.99 |
| VEGF-A | 0.02 | 0.67 | 0.22 | 0.59 | 1.18 |
| LSR | 2.97 | 13.28 | 1.25 | 7.81 | 3.71 |
| WWC2 | 0.07 | 0.22 | 0.06 | 0.39 | 0.81 |
| CK8 | 5.23 | 0.90 | 1.70 | 3.97 | 88.37 |
| CK18 | n.d. | n.d. | n.d. | 5.59 | 0.25 |
| CK19 | n.d. | 0.68 | 1.92 | 21.18 | n.d. |
| AQP3 | 0.09 | 0.18 | 1.41 | 0.15 | 0.07 |
| AQP5 | n.d. | n.d. | n.d. | n.d. | 0.02 |
| AQP11 | n.d. | n.d. | n.d. | 0.09 | 0.04 |
| MUC1A | 1.10 | 0.62 | 0.18 | 13.42 | 105.86 |
| MUC1B | 21.66 | 0.71 | 1.12 | 3.15 | 88.37 |
| MUC18 | 0.91 | 1.38 | 0.42 | 3.24 | 5.33 |
| MUC20 | 0.13 | 0.95 | n.d. | 0.29 | 0.96 |
| e-cadherin | 1.29 | n.d. | n.d. | 0.09 | 0.17 |
| b-catenin tv1-3 | 0.41 | 0.34 | 0.18 | 1.34 | 0.43 |
| vimentin1 | 0.36 | 1.09 | 0.32 | 1.11 | 1.59 |
| Fibronectin | 0.70 | 3.80 | 3.11 | 7.65 | 6.33 |
| S100A4 tv1 | 5.57 | 8.59 | 3.26 | 3.89 | 3.99 |
| ABCA1 | 0.27 | 2.68 | n.d. | 1.09 | 21.60 |
| ABCA7 | 0.04 | 0.52 | 7.24 | 0.28 | 516.76 |
| ApoE | 0.01 | 0.02 | 4.60 | 0.02 | 3.09 |
| hRARb tva | n.d. | n.d. | n.d. | 0.33 | n.d. |
| hRARb tvb | 8.77 | 0.79 | 17.61 | 7.31 | 115.89 |
| hRxRa | n.d. | 0.06 | n.d. | 0.84 | n.d. |
| hRxRb | 0.14 | 0.10 | n.d. | 1.17 | n.d. |
| MFSD2A | 1.13 | 5.05 | 9.02 | 14.56 | 135.62 |
| Pecam-1 | 0.13 | 9.34 | n.d. | 11.78 | n.d. |
| RAGE | 3.49 | 1.07 | 6.60 | 4.79 | 58.17 |

Supplementary table 18: List of targets that showed enriched mRNA levels when comparing isolated brain capillaries to corresponding total brain samples of all patients suffering from TBI. Targets were considered to be enriched, when 3 out of 5 samples were enriched. A target was considered to be enriched, when it was equal to or greater than 1.3-fold. N=1, n=1

| survival time after TBI | contralateral | contusional |
| --- | --- | --- |
| 0h | ABCA1, ABCA7, ABCB1, BCRP, CAT-1, CDH5, CLDN-5, CLDN-17, CLDN-23, Fibronectin, GLUT-1, JAM-1, LAT1, LRP-8, LSR, Marveld2 (tricellulin), MFSD2A, MRP-1, MRP-5, MUC18, RAGE, RARb tvb, S100A4 tv1, vWF (24) | CDH5, CK8, CLDN-2, CLDN-4, CLDN-5, CLDN-6, CLDN-8, CLDN-10 tva, CLDN-15, CLDN-17, CLDN-18, CLDN-22, e-cadherin, GLUT-1, JAM-1, LAT1, LSR, Marveld2 (tricellulin), MUC1B, RAGE, RARb tvb, S100A4 tv1, vWF (23) |
| 4h | ABCB1, BCRP, CAT-1, CAT-3, CDH5, CK18, CK19, CK8, CLDN-4, CLDN-5, CLDN-6, CLDN-8, CLDN-9, CLDN-10 tva, CLDN-14, CLDN-15, CLDN-17, CLDN-18, CLDN-20, CLDN-21, CLDN-24, CLDN-27, Fibronectin, GLUT-1, JAM-1, LAT1, LRP-8, LSR, Marveld2 (tricellulin), MCT-8, MFSD2A, MUC18, MUC1A, MUC1B, Pecam-1, RAGE, RARb tvb, vWF, ZO-2 (39) | ABCA1, ABCB1, BCRP, CDH5, CLDN-5, CLDN-8, ENT-1, Fibronectin, GLUT-1, LAT1, LRP-8, LSR, Marveld2 (tricellulin), MCT-1, MFSD2A, MRP-4, MUC18, Pecam-1, S100A4 tv1, vWF (20) |
| 7h | ABCA1, ABCB1, BCRP, CAT-3, CDH5, CK19, CK8, CLDN-2, CLDN-3, CLDN-4, CLDN-5, CLDN-6, CLDN-8, CLDN-9, CLDN-10 tva, CLDN-14, CLDN-17, CLDN-18, CLDN-21, CLDN-22, CLDN-23, CLDN-24, CLDN-27, Fibronectin, JAM-1, LAT1, LRP-8, LSR, Marveld2 (tricellulin), MCT-1, MFSD2A, MRP-4, MUC18, MUC1A, MUC1B, Pecam-1, RAGE, RARb tvb, vWF  (39) | ABCA7, ApoE, AQP3, BCRP, CAT-3, CDH5, CK19, CK8, CLDN-3, CLDN-4, CLDN-5, CLDN-6, CLDN-8, CLDN-9, CLDN-10 tva, CLDN-10 tvb, CLDN-14, CLDN-15, CLDN-17, CLDN-18, CLDN-21, CLDN-22, CLDN-24, CLDN-25 (=CLDND1), Fibronectin, GLUT-1, JAM-1, JAM-2, LAT1, LSR, MFSD2A, MRP-4, RAGE, RARb tvb, S100A4 tv1, vWF (36) |
| 21h | ABCB1, BCRP, CAT-1, CDH5, CK18, CK19, CLDN-1, CLDN-5, CLDN-6, CLDN-8, CLDN-10 tva, CLDN-12 tv2, CLDN-14, CLDN-15, CLDN-17, CLDN-18, CLDN-21, CLDN-24, Fibronectin, GLUT-1, JAM-1, LAT1, LRP-8, LSR, Marveld2 (tricellulin), MCT-1, MCT-8, MFSD2A, MRP-4, MUC1A, MUC1B, Pecam-1, TfR, vimentin1, vWF (35) | ABCB1, b-catenin tv1-3, BCRP, CAT-3, CDH5, CK8, CK18, CK19, CLDN-2, CLDN-3, CLDN-5, CLDN-6, CLDN-8, CLDN-9, CLDN-10 tva, CLDN-14, CLDN-17, CLDN-18, CLDN-21, CLDN-24, CLDN-27, Fibronectin, GLUT-1, JAM-1, JAM-2, LAT1, LRP-8, LSR, Marveld2 (tricellulin), MCT-1, MCT-8, MFSD2A, MRP-4, MUC18, MUC1A, MUC1B, Pecam-1, RAGE, RARb tvb, S100A4 tv1, TfR, vWF (42) |
| 48h | CAT-3, CDH5, CK19, CK8, CLDN-2, CLDN-3, CLDN-4, CLDN-5, CLDN-6, CLDN-8, CLDN-9, CLDN-10 tva, CLDN-14, CLDN-17, CLDN-18, CLDN-20, CLDN-21, CLDN-22, Fibronectin, GLUT-1, LAT1, Marveld2 (tricellulin), MFSD2A, MUC1A, MUC1B, Pecam-1, RAGE, RARb tvb, S100A4 tv1 (29) | ABCA1, ABCA7, ABCB1, ApoE, BCRP, CAT-3, CDH5, CK8, CLDN-3, CLDN-4, CLDN-5, CLDN-6, CLDN-8, CLDN-10 tva, CLDN-10 tvb, CLDN-17, CLDN-18, CLDN-25, Fibronectin, GLUT-1, InR, JAM-1, LAT1, LRP-8, LSR, Marveld2 (tricellulin), MCT-1, MFSD2A, MRP-4, MUC18, MUC1A, MUC1B, RAGE, RARb tvb, S100A4 tv1, TfR, vimentin1, vWF, ZO-1, ZO-2 (40) |

Supplementary table 19: List of targets that showed decreased mRNA levels when comparing isolated brain capillaries to corresponding total brain samples of all patients suffering from TBI. Targets were considered to be decreased, when 3 out of 5 samples were decreased. A target was considered to be decreased, when it was equal to or smaller than 0.7-fold. N=1, n=1

| survival time after TBI | contralateral | contusional |
| --- | --- | --- |
| 0h | AQP3, b-catenin tv1-3, CLDN-1, CLDN-2, CLDN-3, CLDN-4, CLDN-6, CLDN-9, CLDN-10 tvb, CLDN-12 tv1, CLDN-12 tv3, CLDN-14, CLDN-18, CLDN-21, CLDN-22, CLDN-24, ENT-1, JAM-2, JAM-3, LRP-1 , MCT-1, MCT-8, MRP-4, MUC1A, MUC1B, MUC20, RxRa tv1, RxRb tv2, TfR, VEGF-A, vimentin1, WWC2, ZO-1, ZO-2  (34) | ABCA1, AQP3, b-catenin tv1-3, CLDN-1, CLDN-10 tvb, CLDN-11, CLDN-12 tv1, CLDN-12 tv3, CLDN-25 (= CLDND1), ENT-1, Fibronectin, InR, JAM-2, JAM-3, LRP-1 , LRP-8, MCT-1, MCT-8, MRP-4, MRP-5, MUC20, RxRb tv2, TfR, vimentin1, WWC2, ZO-1, ZO-2 (27) |
| 4h | ABCA7, CLDN-1, CLDN-10 tvb, CLDN-11, ENT-1, JAM-2, JAM-3, LRP-1 , MRP-1, MRP-2, MRP-4, MRP-5, MUC20, VEGF-A, WWC2, ZO-1 (16) | ABCA7, AQP3, b-catenin tv1-3, CAT-1, CK19, CLDN-1, CLDN-2, CLDN-3, CLDN-4, CLDN-6, CLDN-10 tvb, CLDN-12 tv3, CLDN-14, CLDN-15, CLDN-18, CLDN-18 tv2a, CLDN-20, CLDN-25, CLDN-27, JAM-2, LRP-1 , MRP-1, MUC1A, MUC1B, RxRa tv1, RxRb tv2, VEGF-A, WWC2, ZO-1, ZO-2  (30) |
| 7h | ABCA7, AQP11, AQP5, b-catenin tv1-3, CAT-1, CK18, CLDN-12 tv1, CLDN-12 tv3, CLDN-15, CLDN-18 tv2a, CLDN-25 (=CLDND1), CLDN-25 tv7 (=CLDND1 tv7), ENT-1, JAM-2, JAM-3, MCT-8, MRP-1, MRP-5, MUC20, RARb tva, RxRb tv2, TfR, vimentin1, WWC2, ZO-1, ZO-2, ZO-3  (27) | b-catenin tv1-3, CAT-1, CLDN-2, LRP-1 , LRP-8, MUC1A, MUC18, TfR, VEGF-A, vimentin1, WWC2, ZO-2  (12) |
| 21h | ABCA7, AQP11, AQP3, CAT-3, CLDN-10 tvb, CLDN-12 tv1, CLDN-12 tv3, CLDN-27, e-cadherin, ENT-1, InR, MRP-1, MRP-2, MRP-5, MUC18, MUC20, RARb tva, RxRa tv1, RxRb tv2, S100A4 tv1, VEGF-A, WWC2, ZO-1, ZO-2 (24) | ABCA7, AQP11, AQP3, CLDN-1, CLDN-10 tvb, CLDN-12 tv1, CLDN-12 tv2, CLDN-12 tv3, CLDN-15, CLDN-16, e-cadherin, ENT-1, JAM-3, LRP-1 , MRP-1, MRP-5, MUC20, RARb tva, VEGF-A, WWC2, ZO-1, ZO-2 (22) |
| 48h | ABCB1, ApoE, AQP5, b-catenin tv1-3, BCRP, CAT-1, CLDN-11, CLDN-15, CLDN-25 (=CLDND1), ENT-1, InR, JAM-1, JAM-2, LRP-8, MCT-1, MCT-8, MRP-1, MRP-4, MUC20, RxRb tv2, TfR, VEGF-A, WWC2, ZO-1, ZO-3 (25) | AQP3, b-catenin tv1-3, CAT-1, CK18, CLDN-1, CLDN-11, CLDN-12 tv2, CLDN-12 tv3, CLDN-15, CLDN-16, e-cadherin, ENT-1, JAM-2, LRP-1 , MRP-1, MRP-3, MRP-5  (17) |

Supplementary table 20: Targets with enriched or decreased mRNA levels in contusional capillaries normalized to corresponding contralateral capillaries in comparison to BCELC in triple-culture after 6h OGD, 7h OGD, 9h OGD as well as after 6h OGD and after 18h OGR. Targets that were equal to or greater than 1.3 were considered to be enriched, whereas targets that were equal to or smaller than 0.7 were considered to be decreased. N=1-3, n=1-3

|  | enriched | decreased |
| --- | --- | --- |
| 0h TBI | AQP3, CK19, CK8, CLDN-1, CLDN-2 tv3, CLDN-4, CLDN-6, CLDN-8, CLDN-9, CLDN-10 tva, CLDN-10 tvb, CLDN-12 tv1, CLDN-14, CLDN-15, CLDN-17, CLDN-18 tv1, CLDN-20, CLDN-21, CLDN-22, CLDN-24, ENT-1, MRP-4, MUC1A, MUC1B, S100A4 tv1, vimentin1  (26) | ABCA1, ABCA7, ABCB1, BCRP, CDH5, CLDN-3, CLDN-5, CLDN-12 tv3, CLDN-23, CLDN-25, Fibronectin, GLUT-1, InR, JAM-1, LAT1, LRP-8, LSR, MCT-1, MCT-8, MFSD2A, MRP-5, MUC18, MUC20, Pecam-1, RAGE, RxRa tv1, RxRb tv2, TfR, VEGF-A, vWF, WWC2, ZO-1 (32) |
| 4h TBI | ApoE, CAT-3, CK19, CK8, CLDN-1, CLDN-2 tv3, CLDN-3, CLDN-4, CLDN-6, CLDN-8, CLDN-9, CLDN-10 tva, CLDN-14, CLDN-17, CLDN-18 tv1, CLDN-21, CLDN-22, CLDN-24, CLDN-27, ENT-1, MRP-4, MUC1B, RARb tvb, RxRa tv1 (24) | ABCA1, ABCA7, ABCB1, b-catenin tv1-3, BCRP, CAT-1, CK18, CLDN-5, CLDN-15, CLDN-20, CLDN-23, CLDN-25, Fibronectin, GLUT-1, InR, JAM-1, LAT1, Marveld2 (tricellulin), MCT-8, MFSD2A, MRP-5, Pecam-1, RxRb tv2, TfR, WWC2, ZO-1, ZO-2 (27) |
| 7h TBI | ApoE, AQP3, CLDN-9, CLDN-10 tvb, CLDN-11, CLDN-15, JAM-2  (7) | ABCA1, ABCA7, ABCB1, b-catenin tv1-3, BCRP, CAT-1, CDH5, CK8, CK19, CLDN-1, CLDN-2 tv3, CLDN-5, CLDN-21, CLDN-22, ENT-1, Fibronectin, GLUT-1, JAM-1, JAM-3, LAT1, LRP-1 , LRP-8, LSR, MCT-1, MCT-8, MFSD2A, MRP-4, MUC18, MUC1A, Pecam-1, RAGE, RARb tvb, RxRa tv1, RxRb tv2, TfR, vimentin1, vWF, WWC2, ZO-1, ZO-2  (40) |
| 21h TBI | ABCA1, ABCA7, AQP11, AQP3, b-catenin tv1-3, CAT-3, CDH5, CK19, CK8, CLDN-1, CLDN-3, CLDN-4, CLDN-6, CLDN-8, CLDN-9, CLDN-10 tva, CLDN-10 tvb, CLDN-14, CLDN-17, CLDN-18 tv1, CLDN-19, CLDN-2 tv3, CLDN-21, CLDN-22, CLDN-24, CLDN-25, CLDN-27, InR, JAM-1, JAM-3, MRP-1, MRP-4, MRP-5, MUC18, MUC1B, MUC20, Pecam-1, RAGE, RARb tvb, RxRa tv1, S100A4 tv1, VEGF-A, vWF (43) | ABCB1, BCRP, CAT-1, CLDN-11, CLDN-12 tv1, CLDN-12 tv2, CLDN-15, CLDN-23, GLUT-1, JAM-2, MCT-1, MCT-8, TfR, WWC2  (14) |
| 48h TBI | ABCA1, ABCA7, ABCB1, AQP3, b-catenin tv1-3, BCRP, CAT-1, CLDN-1, CLDN-9, CLDN-15, CLDN-20, ENT-1, Fibronectin, JAM-1, JAM-3, LAT1, LRP-1 , LRP-8, LSR, Marveld2 (tricellulin), MCT-8, MFSD2A, MRP-1, MRP-4, MRP-5, MUC18, MUC1A, MUC20, RARb tva, RxRa tv1, S100A4 tv1, TfR, VEGF-A, vWF, ZO-1, ZO-2  (36) | AQP5, CAT-3, CK19, CK8, CLDN-2 tv3, CLDN-4, CLDN-6, CLDN-8, CLDN-10 tva, CLDN-17, CLDN-18 tv1, CLDN-19, CLDN-21, CLDN-22, CLDN-23, CLDN-24, CLDN-25, JAM-2, MCT-1, MUC1B, Pecam-1, RARb tvb, RxRb tv2, S100A4 tv2  (24) |
| 6h OGD  (24 well-plate inserts) | AQP3, CAT-1, CDH5, CK18, CLDN-1, CLDN-8, CLDN-10 tva, CLDN-10 tvb, CLDN-11, CLDN-16, CLDN-18 tv1, CLDN-19, CLDN-2 tv3, CLDN-21, CLDN-22, CLDN-24, CLDN-25, CLDN-25 tv7, Fibronectin, GLUT-1, JAM-2, JAM-3, LAT1, MCT-1, MRP-2, MRP-4, Occludin, S100A4 tv1, S100A4 tv2, VEGF-A, ZO-1 (31) | AQP10, b-catenin tv1-3, CK19, CLDN-6, CLDN-12 tv1, LRP-8, TfR, vimentin1  (8) |
| 7h OGD  (24 well-plate inserts) | ABCB1, CAT-1, CDH5, CLDN-1, CLDN-2 tv3, CLDN-5, CLDN-9, CLDN-10 tva, CLDN-10 tvb, CLDN-11, CLDN-14, CLDN-17, CLDN-18 tv1, CLDN-21, CLDN-24, CLDN-25, CLDN-25 tv7, GLUT-1, InR, JAM-2, LAT1, LRP-1 , MCT-1, MRP-1, MRP-2, MRP-3, MRP-4, MUC18, Occludin, RAGE, VEGF-A, WWC2, ZO-1, ZO-2  (34) | AQP3, AQP10, CLDN-8, CLDN-12 tv1, CLDN-15, CLDN-23, e-cadherin  (7) |
| 9h OGD  (24 well-plate inserts) | CAT-3, CLDN-1, CLDN-3, CLDN-5, CLDN-7, CLDN-8, CLDN-10 tva, CLDN-10 tvb, CLDN-19, CLDN-21, CLDN-22, CLDN-24, GLUT-1, JAM-1, JAM-3, LAT1, MCT-1, MRP-3, MRP-4, VEGF-A, WWC2, ZO-1, ZO-3  (23) | ABCB1, AQP10, AQP11, AQP3, AQP5, b-catenin tv1-3, CK8, CK18, CK19, CLDN-2 tv3, CLDN-6, CLDN-12 tv1, CLDN-12 tv2, CLDN-12 tv3, CLDN-15, CLDN-16, CLDN-18 tv1, CLDN-23, CLDN-25, CLDN-25 tv7, CLDN-27, e-cadherin, Fibronectin, InR, LRP-1 , LRP-8, Marveld2 (tricellulin), MCT-8, MRP-1, MRP-2, MRP-5, MUC18, MUC1A, MUC1B, MUC20, S100A4 tv1, S100A4 tv2, vimentin1, vWF, ZO-2  (40) |
| 6h OGD  (12 well-plate inserts) | ABCB1, CAT-1, CAT-3, CDH5, CK8, CLDN-1, CLDN-2 tv3, CLDN-5, CLDN-10 tva, CLDN-10 tvb, CLDN-11, CLDN-14, CLDN-17, CLDN-19, CLDN-21, CLDN-22, CLDN-27, GLUT-1, JAM-3, LAT1, LRP-1 , MCT-1, MFSD2A, MRP-3, MRP-4, MUC18, Occludin, RARa tv1-4, VEGF-A, WWC2, ZO-1  (31) | ABCA7, AQP10, AQP5, CLDN-3, CLDN-4, CLDN-9, CLDN-12 tv1, CLDN-15, CLDN-20, CLDN-23, CLDN-25, MUC1A, MUC1B, RARb tva, RxRa tv1, RxRb tv2, S100A4 tv2, TfR  (18) |
| 6h OGD + 18h OGR (12 well-plate inserts) | ABCA1, ABCA7, ABCB1, AQP10, b-catenin tv1-3, BCRP, CAT-1, CLDN-1, CLDN-2 tv3, CLDN-3, CLDN-4, CLDN-5, CLDN-7, CLDN-8, CLDN-10 tva, CLDN-14, CLDN-15, CLDN-16, CLDN-17, CLDN-18 tv1, CLDN-19, CLDN-20, CLDN-21, CLDN-22, CLDN-24, e-cadherin, ENT-1, GLUT-1, InR, JAM-3, LAT1, LRP-1 , MCT-1, MCT-8, Occludin, RAGE, RARb tva, RARb tvb, RxR a tv1, RxRb tv2, S100A4 tv2, TfR, VEGF-A, vimentin1, vWF, WWC2, ZO-1, ZO-2, ZO-3  (49) | AQP5, CAT-3, CDH5, CLDN-10 tvb, CLDN-11, MUC1A, RARa tv1-4  (7) |

Supplementary table 21: Protein levels of total brain samples from the contusional area were normalized to corresponding total brain samples from the contralateral area (x-fold). Protein levels were determined with OLINK. N=1. n=1

| Target/sample | TBI  + 0h survival | TBI  + 4h survival | TBI  + 7h survival | TBI  + 21h survival | TBI  + 48h survival |
| --- | --- | --- | --- | --- | --- |
| TNFRSF14 | 0.39 | 0.40 | 0.37 | 0.78 | 1.52 |
| LDL receptor | n.d. | 1.26 | 1.36 | 1.40 | 1.79 |
| ITGB2 | 0.02 | 1.22 | 1.85 | 2.52 | 0.69 |
| IL-17RA | n.d. | 1.09 | 1.40 | n.d. | n.d. |
| TNF-R2 | 0.32 | 0.77 | 1.44 | 2.18 | 0.95 |
| MMP-9 | 0.86 | 0.86 | 1.74 | 9.07 | 0.45 |
| EPHB4 | 0.67 | 0.99 | 1.17 | n.d. | 0.82 |
| IL2-RA | n.d. | 0.90 | 0.66 | 1.73 | 1.23 |
| OPG | 0.63 | 0.52 | 0.08 | 4.35 | 1.54 |
| ALCAM | 0.01 | 1.34 | 2.15 | 2.89 | 0.72 |
| TFF3 | 1.27 | 0.20 | 0.70 | 0.81 | 2.90 |
| SELP | 0.14 | 0.56 | 1.71 | 10.13 | 0.74 |
| CSTB | 1.08 | 0.93 | 0.92 | 1.04 | 0.98 |
| MCP-1 | 0.58 | 0.92 | 0.78 | 107.83 | 0.74 |
| CD163 | 0.14 | 0.95 | 0.53 | 2.28 | 0.76 |
| Gal-3 | 1.97 | 0.41 | 0.11 | 2.11 | 0.75 |
| GRN | 0.62 | 1.11 | 1.01 | 1.05 | 1.20 |
| NT-pro BNP | 1.11 | 1.00 | 1.19 | n.d. | 0.87 |
| BLM hydrolase | n.d. | n.d. | n.d. | n.d. | 2.48 |
| PLC | 0.10 | 0.48 | 0.28 | 1.76 | 0.84 |
| LTBR | 0.40 | 0.70 | 0.41 | 0.91 | 1.68 |
| Notch 3 | 0.50 | 0.95 | 0.64 | 1.09 | n.d. |
| TIMP4 | 2.25 | 0.43 | 0.55 | 2.70 | 0.53 |
| CNTN1 | 0.02 | 1.15 | 1.96 | 2.90 | 0.71 |
| CDH5 | 0.96 | 1.03 | 1.41 | 0.83 | 1.37 |
| TLT-2 | n.d. | 0.99 | 0.96 | n.d. | n.d. |
| FABP4 | 0.36 | 0.37 | 0.48 | 3.60 | 0.89 |
| TFPI | 0.13 | 0.47 | 0.42 | 4.51 | 1.45 |
| PAI | n.d. | n.d. | 0.82 | n.d. | 0.84 |
| CCL24 | 1.30 | 0.57 | 0.80 | 2.49 | 0.60 |
| TR | 1.59 | 0.71 | 0.69 | 3.53 | 0.50 |
| TNFRSF10C | n.d. | 0.74 | 1.20 | 1.83 | 1.02 |
| GDF-15 | n.d. | 0.55 | 0.19 | 2.44 | 0.78 |
| SELE | n.d. | 0.70 | 1.09 | n.d. | 1.22 |
| AZU1 | 1.39 | 1.33 | 0.33 | 37.13 | 0.69 |
| DLK-1 | 0.38 | 0.61 | 1.03 | 1.58 | 1.51 |
| SPON1 | 0.45 | 0.98 | 1.02 | 1.89 | 1.11 |
| MPO | 3.61 | 2.94 | 0.31 | 24.62 | 0.56 |
| CXCL16 | 0.57 | 3.00 | 0.65 | 2.31 | 1.35 |
| IL-6RA | 0.12 | 1.73 | 1.34 | 5.23 | 0.92 |
| RETN | 1.40 | 0.74 | 0.89 | 10.16 | 0.63 |
| IGFBP-1 | 1.96 | 0.34 | 0.90 | 4.82 | 1.22 |
| CHIT1 | n.d. | 0.79 | 1.19 | n.d. | 0.70 |
| GP6 | 0.98 | 1.16 | 0.98 | n.d. | 0.77 |
| Ep-CAM | 0.47 | 2.11 | 5.86 | 1.26 | 0.88 |
| AP-N | 1.07 | 0.83 | n.d. | n.d. | 0.72 |
| AXL | 0.04 | 1.03 | 1.62 | 1.86 | 0.96 |
| IL-1RT1 | n.d. | n.d. | 0.83 | n.d. | 0.38 |
| 157_FAS | 0.25 | 0.53 | 1.04 | 1.13 | 0.87 |
| MB | 5.57 | 0.28 | 0.19 | 2.05 | 31.65 |
| TNFSF13B | n.d. | 1.05 | n.d. | n.d. | n.d. |
| PRTN3 | n.d. | 3.33 | 1.02 | 25.17 | 0.50 |
| PCSK9 | n.d. | n.d. | 0.91 | n.d. | 0.74 |
| Gal4 | n.d. | n.d. | 0.82 | 1.24 | 1.24 |
| OPN | 0.07 | 1.86 | 1.31 | 1.53 | 2.15 |
| CTSD | n.d. | 2.08 | 0.83 | 3.34 | 0.80 |
| PGLYRP1 | 0.88 | 1.01 | 1.97 | 28.59 | 0.50 |
| CPA1 | n.d. | n.d. | 1.15 | n.d. | 1.12 |
| JAM-A | n.d. | 0.71 | 0.92 | 2.39 | 0.38 |
| IL-1RT2 | 0.81 | 0.99 | 1.76 | n.d. | 0.66 |
| SHPS-1 | 0.04 | 0.81 | 0.70 | 1.40 | 1.04 |
| CCL15 | 1.50 | 0.56 | 0.85 | 2.54 | 0.91 |
| CASP-3 | 0.30 | 1.82 | 1.39 | 3.39 | 0.89 |
| uPA | 0.28 | 1.10 | 0.20 | 4.56 | 0.85 |
| IGFBP-7 | 0.15 | 0.72 | 0.34 | 1.78 | 1.17 |
| CHI3L1 | n.d. | n.d. | 1.19 | n.d. | 0.47 |
| ST2 | 0.94 | 1.51 | 0.78 | 8.84 | 1.10 |
| t-PA | 0.06 | 0.91 | 0.07 | 1.27 | 0.66 |
| SCGB3A2 | 2.01 | 0.89 | 1.05 | n.d. | 1.10 |
| EGFR | n.d. | n.d. | 0.92 | n.d. | 1.11 |
| CD93 | 0.04 | 0.82 | 0.28 | 5.80 | 1.80 |
| IL-18BP | 0.79 | 1.36 | 1.56 | 2.79 | 1.45 |
| COL1A1 | n.d. | n.d. | 0.22 | n.d. | 1.11 |
| PON3 | n.d. | n.d. | 1.37 | n.d. | 0.93 |
| CTSZ | n.d. | 1.16 | 0.69 | 2.26 | 0.68 |
| IGFBP-2 | 3.72 | 0.42 | 0.28 | 1.71 | 2.23 |
| RARRES2 | 2.29 | 3.48 | 0.39 | 2.13 | 1.14 |
| ICAM-2 | 0.64 | 0.73 | 0.79 | 2.01 | 1.79 |
| KLK6 | 0.65 | 3.46 | 2.52 | 1.04 | 1.35 |
| PDGF subunit A | n.d. | 2.67 | 1.00 | 0.92 | 1.00 |
| TNF-R1 | 0.12 | 0.75 | 0.44 | 1.55 | 2.50 |
| vWF | 0.59 | 0.77 | 0.87 | 2.03 | 0.53 |
| PECAM-1 | 0.11 | 0.44 | 1.22 | 2.77 | 0.59 |
| MEPE | 0.90 | 0.58 | 0.58 | 1.18 | 1.28 |
| CCL16 | 1.69 | 0.71 | 0.73 | 2.37 | 0.86 |

Supplementary table 22: Protein levels of isolated brain capillaries from the contusional area were normalized to corresponding contralateral isolated brain capillaries from the contralateral area (x-fold). Protein levels were determined with OLINK. N=1. n=1

| Target/sample | TBI  + 0h survival | TBI  + 4h survival | TBI  + 7h survival | TBI  + 21h survival | TBI  + 48h survival |
| --- | --- | --- | --- | --- | --- |
| TNFRSF14 | 0.96 | 1.35 | 0.42 | 1.65 | 1.46 |
| LDL receptor | 1.35 | 1.00 | 0.50 | 1.46 | 1.94 |
| ITGB2 | 1.60 | 0.62 | 1.41 | 1.74 | 1.89 |
| IL-17RA | 1.18 | 1.02 | 0.99 | 1.20 | 0.87 |
| TNF-R2 | 0.76 | 1.42 | 0.55 | 1.24 | 0.92 |
| MMP-9 | 2.44 | 0.87 | 2.70 | 4.06 | 2.01 |
| EPHB4 | 1.43 | 1.17 | 0.81 | 1.30 | 1.11 |
| IL2-RA | 1.18 | 0.63 | 0.72 | 0.99 | 0.77 |
| OPG | 1.16 | 3.87 | 0.42 | 1.56 | 15.97 |
| ALCAM | 1.89 | 1.28 | 0.21 | 1.33 | 2.69 |
| TFF3 | 1.05 | 1.06 | n.d. | n.d. | n.d. |
| SELP | 3.48 | 0.64 | 2.18 | 2.30 | 2.41 |
| CSTB | 2.00 | 1.21 | 0.19 | 1.92 | 3.33 |
| MCP-1 | 1.15 | 0.73 | 1.49 | 4.60 | 0.80 |
| CD163 | 1.57 | 0.47 | 0.61 | 1.56 | 1.64 |
| Gal-3 | 1.16 | 1.00 | 0.17 | 1.12 | 2.49 |
| GRN | 1.48 | 1.09 | 0.60 | 1.50 | 1.67 |
| NT-pro BNP | 1.05 | 0.67 | 0.81 | n.d. | n.d. |
| PLC | 1.19 | 1.25 | 0.40 | 1.42 | 4.10 |
| LTBR | 1.15 | 1.35 | 0.44 | 1.53 | 2.17 |
| Notch 3 | 0.77 | 2.86 | 0.45 | 1.95 | 1.51 |
| TIMP4 | n.d. | n.d. | 0.76 | n.d. | n.d. |
| CNTN1 | 1.60 | 3.94 | 0.06 | 1.33 | 3.29 |
| CDH5 | 1.73 | 0.81 | 0.29 | 0.96 | 1.65 |
| TLT-2 | n.d. | n.d. | 0.89 | 1.11 | n.d. |
| FABP4 | n.d. | 0.83 | 0.93 | n.d. | 1.38 |
| TFPI | 1.37 | 0.98 | 0.36 | 1.57 | 4.65 |
| PAI | n.d. | n.d. | 1.33 | n.d. | 15.27 |
| CCL24 | 0.86 | 0.99 | 1.18 | 1.12 | 0.95 |
| TR | 1.59 | 0.97 | 0.57 | 1.53 | 1.56 |
| TNFRSF10C | n.d. | 1.10 | 0.97 | 1.59 | 1.27 |
| GDF-15 | n.d. | 0.93 | 0.34 | 1.26 | 4.50 |
| SELE | n.d. | 0.98 | 2.80 | 18.86 | 0.40 |
| AZU1 | 2.17 | 0.59 | 5.90 | 6.81 | 2.26 |
| DLK-1 | 1.15 | 0.35 | 0.96 | 0.89 | 0.82 |
| SPON1 | 0.94 | 1.18 | 0.70 | 0.94 | 1.20 |
| MPO | 1.77 | 1.05 | 5.24 | 6.78 | 1.36 |
| CXCL16 | 1.31 | 1.36 | 0.69 | 1.27 | 1.37 |
| IL-6RA | 1.30 | 0.78 | 0.81 | 3.88 | 1.43 |
| RETN | 1.27 | 1.03 | 0.86 | 1.75 | 1.60 |
| IGFBP-1 | 1.13 | 1.02 | 0.75 | 1.23 | 1.12 |
| CHIT1 | n.d. | n.d. | n.d. | n.d. | 1.25 |
| TR-AP | 1.04 | 1.04 | 1.02 | n.d. | n.d. |
| GP6 | 1.10 | 0.87 | 1.06 | 1.18 | 0.58 |
| Ep-CAM | 1.36 | 0.98 | 0.44 | 1.37 | 2.01 |
| AP-N | 1.57 | 0.83 | 0.47 | 1.32 | 1.90 |
| AXL | 1.29 | 1.82 | 0.54 | 1.18 | 1.80 |
| IL-1RT1 | 1.29 | 1.12 | 0.74 | 1.97 | 1.44 |
| FAS | 1.33 | 0.95 | 0.42 | 1.56 | 2.05 |
| PRTN3 | 1.33 | 0.83 | 2.03 | 1.97 | 2.33 |
| PCSK9 | n.d. | 1.18 | 1.11 | 1.04 | 1.03 |
| OPN | 23.27 | 0.96 | 0.97 | 2.49 | 6.02 |
| CTSD | 1.27 | 0.61 | n.d. | n.d. | 1.75 |
| PGLYRP1 | 1.86 | 0.86 | 1.06 | 3.34 | 1.52 |
| CPA1 | n.d. | n.d. | 0.98 | n.d. | n.d. |
| JAM-A | 1.90 | 0.92 | 0.51 | 1.38 | 1.66 |
| SHPS-1 | 1.66 | 7.73 | 0.05 | 1.79 | 2.38 |
| CCL15 | 1.29 | 0.92 | 1.08 | 1.14 | 0.76 |
| CASP-3 | 1.60 | 1.09 | 1.20 | 1.02 | 1.30 |
| uPA | 1.10 | 1.00 | 0.79 | 5.05 | 7.62 |
| IGFBP-7 | 0.94 | 1.36 | 0.23 | 2.70 | 22.98 |
| CHI3L1 | n.d. | n.d. | n.d. | n.d. | 0.97 |
| ST2 | 0.92 | 0.98 | 1.44 | 3.61 | 1.57 |
| t-PA | 1.02 | 0.63 | 0.42 | 1.26 | 2.10 |
| SCGB3A2 | n.d. | 1.01 | 0.89 | n.d. | n.d. |
| EGFR | n.d. | 1.02 | n.d. | n.d. | 0.99 |
| CD93 | 0.96 | 0.86 | 0.73 | 2.40 | 11.69 |
| IL-18BP | 1.25 | 1.01 | 0.88 | 1.30 | 0.91 |
| COL1A1 | 1.32 | 1.29 | 0.93 | 1.01 | 1.61 |
| PON3 | 1.02 | 0.97 | 0.94 | 1.25 | n.d. |
| CTSZ | 1.19 | 0.94 | 0.46 | 1.34 | 1.32 |
| IGFBP-2 | 1.30 | 1.62 | 0.32 | 1.21 | 1.37 |
| RARRES2 | 1.43 | 0.48 | 0.53 | 0.79 | 2.80 |
| ICAM-2 | 1.78 | 1.12 | 0.34 | 1.68 | 1.71 |
| KLK6 | 1.77 | 0.69 | 0.66 | 0.81 | 1.92 |
| PDGF subunit A | 1.46 | 0.76 | 0.80 | 0.99 | 1.83 |
| TNF-R1 | 1.61 | 1.32 | 0.48 | 1.92 | 1.79 |
| vWF | 0.74 | 2.02 | 1.62 | 1.72 | 1.79 |
| PECAM-1 | 1.78 | 0.83 | 0.46 | 1.67 | 1.56 |
| MEPE | 3.19 | n.d. | 0.78 | n.d. | 1.31 |

Supplementary table 23: Protein levels enrichment of isolated brain capillaries from the contralateral area were put into relation to corresponding total brain samples from the contralateral area. Protein levels were measured with OLINK. N=1. n=1

| Target/sample | TBI  + 0h survival | TBI  + 4h survival | TBI  + 7h survival | TBI  + 21h survival | TBI  + 48h survival |
| --- | --- | --- | --- | --- | --- |
| TNFRSF14 | 0.31 | 0.32 | 0.17 | 0.13 | 0.43 |
| LDL receptor | 1.32 | 2.86 | 2.02 | 1.65 | 1.53 |
| ITGB2 | 1.76 | 6.62 | 2.33 | 5.18 | 4.74 |
| IL-17RA | 1.95 | 3.15 | 1.83 | n.d. | 2.21 |
| TNF-R2 | 1.42 | 0.89 | 0.31 | 0.68 | 1.19 |
| MMP-9 | 2.09 | 5.35 | 3.64 | 3.66 | 2.43 |
| EPHB4 | 4.88 | 6.39 | 4.03 | n.d. | 2.75 |
| IL2-RA | 1.71 | 3.07 | 0.50 | 2.80 | 1.73 |
| OPG | 1.21 | 3.15 | 0.13 | 0.97 | 1.52 |
| ALCAM | 0.08 | 0.77 | 1.04 | 0.43 | 0.26 |
| TFF3 | 0.26 | 0.07 | 0.22 | 0.23 | n.d. |
| SELP | 1.60 | 2.97 | 0.17 | 5.32 | 1.27 |
| CSTB | 0.08 | 0.37 | 0.28 | 0.06 | 0.17 |
| MCP-1 | 0.11 | 0.06 | 0.02 | 0.09 | 0.28 |
| CD163 | 5.23 | 19.23 | 3.19 | 5.65 | 4.49 |
| Gal-3 | 0.01 | 0.04 | 0.12 | 0.05 | 0.01 |
| GRN | 1.06 | 1.55 | 0.51 | 0.97 | 0.68 |
| NT-pro BNP | 1.91 | 2.13 | 3.09 | n.d. | 1.89 |
| PLC | 32.10 | 40.44 | 40.33 | 57.16 | 5.58 |
| LTBR | 1.73 | 4.23 | 0.61 | 0.75 | 0.62 |
| Notch 3 | 12.01 | 11.62 | 3.19 | 8.10 | 2.30 |
| TIMP4 | n.d. | n.d. | 1.61 | n.d. | 0.42 |
| CNTN1 | 0.18 | 0.58 | 3.90 | 0.58 | 0.28 |
| CDH5 | 5.06 | 12.50 | 8.07 | 4.88 | 12.48 |
| TLT-2 | n.d. | 1.27 | 1.43 | n.d. | n.d. |
| FABP4 | n.d. | 0.15 | 0.88 | n.d. | 0.43 |
| TFPI | 2.96 | 3.48 | 0.38 | 4.45 | 0.83 |
| PAI | n.d. | n.d. | 1.79 | n.d. | 1.98 |
| CCL24 | 1.89 | 0.66 | 1.05 | 1.97 | 1.52 |
| TR | 26.89 | 24.99 | 46.60 | 40.14 | 16.15 |
| TNFRSF10C | n.d. | 2.32 | 0.74 | 1.28 | 0.94 |
| GDF-15 | n.d. | 2.90 | 1.06 | 1.86 | 1.08 |
| SELE | n.d. | 0.96 | 1.05 | n.d. | 1.87 |
| AZU1 | 3.41 | 8.69 | 0.45 | 4.19 | 2.61 |
| DLK-1 | 1.10 | 1.58 | 0.45 | 0.95 | 1.33 |
| SPON1 | 1.37 | 2.14 | 2.25 | 3.17 | 1.89 |
| MPO | 11.79 | 26.22 | 2.33 | 14.04 | 11.63 |
| CXCL16 | 0.67 | 9.10 | 0.07 | 0.70 | 3.55 |
| IL-6RA | 3.10 | 8.99 | 0.66 | 4.23 | 5.79 |
| RETN | 1.46 | 0.97 | 0.17 | 1.72 | 1.08 |
| IGFBP-1 | 0.97 | 0.11 | 0.03 | 0.65 | 0.13 |
| CHIT1 | n.d. | n.d. | n.d. | n.d. | 0.79 |
| TR-AP | n.d. | 2.05 |  | n.d. | 1.24 |
| GP6 | 2.84 | 2.47 | 1.46 | n.d. | 2.09 |
| Ep-CAM | 0.18 | 1.17 | 0.97 | 0.63 | 1.46 |
| AP-N | 23.22 | 41.63 | n.d. | n.d. | 29.51 |
| AXL | 0.89 | 2.53 | 2.23 | 3.38 | 1.06 |
| IL-1RT1 | n.d. | n.d. | 3.20 | n.d. | 1.44 |
| FAS | 1.05 | 1.60 | 0.29 | 2.72 | 1.25 |
| TNFSF13B | n.d. | n.d. | n.d. | n.d. | 2.16 |
| PRTN3 | n.d. | 3.04 | 1.86 | 2.38 | 0.91 |
| PCSK9 | n.d. |  | 1.75 |  | 1.52 |
| Gal4 | n.d. | n.d. | n.d. | n.d. | 2.51 |
| OPN | 0.03 | 0.12 | 0.07 | 0.04 | 0.04 |
| CTSD | n.d. | 3.94 | 1.00 | n.d. | 0.55 |
| PGLYRP1 | 0.98 | 1.56 | 0.19 | 1.67 | 0.80 |
| CPA1 | n.d. | n.d. | 1.86 | n.d. | 2.11 |
| JAM-A | 22.92 | 55.51 | 88.69 | 59.19 | 24.09 |
| IL-1RT2 | n.d. | n.d. | 2.61 | n.d. | 1.40 |
| SHPS-1 | 0.08 | 0.15 | 0.39 | 0.11 | 0.43 |
| CCL15 | 0.61 | 0.18 | 0.16 | 0.38 | 0.28 |
| CASP-3 | 0.76 | 2.03 | 1.02 | 2.17 | 1.16 |
| uPA | 2.81 | 10.04 | 2.23 | 2.59 | 2.40 |
| IGFBP-7 | 6.94 | 28.75 | 6.58 | 8.25 | 2.96 |
| CHI3L1 | n.d. | n.d. | 1.84 | n.d. | 0.34 |
| ST2 | 2.29 | 2.46 | 1.05 | 2.81 | 1.04 |
| t-PA | 5.26 | 20.66 | 5.39 | 6.72 | 3.93 |
| SCGB3A2 | n.d. | 1.95 | 1.57 | n.d. | n.d. |
| EGFR | n.d. | 2.12 | 1.83 | n.d. | 1.60 |
| CD93 | 3.38 | 18.21 | 0.66 | 7.06 | 5.65 |
| IL-18BP | 1.88 | 1.87 | 0.46 | 1.65 | 2.52 |
| COL1A1 | n.d. | n.d. | 0.49 | n.d. | 2.64 |
| PON3 | 2.02 | n.d. | 2.39 | n.d. | 2.40 |
| CTSZ | 1.13 | 2.76 | 2.62 | 2.15 | 1.45 |
| IGFBP-2 | 0.09 | 0.06 | 0.02 | 0.04 | 0.10 |
| RARRES2 | 0.29 | 1.32 | 0.10 | 0.23 | 0.25 |
| ICAM-2 | 2.95 | 6.15 | 3.61 | 5.61 | 1.99 |
| KLK6 | 0.02 | 0.08 | 0.06 | 0.06 | 0.05 |
| PDGF subunit A | 0.49 | 2.26 | 2.19 | 0.73 | 1.01 |
| TNF-R1 | 0.23 | 0.63 | 0.11 | 0.22 | 0.48 |
| vWF | 29.67 | 14.24 | 5.07 | 26.92 | 8.12 |
| PECAM-1 | 27.97 | 59.62 | 70.49 | 54.04 | 22.21 |
| MEPE | 1.56 | 1.18 | 1.33 | 1.66 | 1.02 |

Supplementary table 24: Protein levels enrichment of isolated brain capillaries from the contusional area were put into relation to corresponding total brain samples from the contusional area. Protein levels were measured with OLINK. N=1. n=1

| Target/sample | TBI  + 0h survival | TBI  + 4h survival | TBI  + 7h survival | TBI  + 21h survival | TBI  + 48h survival |
| --- | --- | --- | --- | --- | --- |
| TNFRSF14 | 0.75 | 1.07 | 0.19 | 0.28 | 0.41 |
| LDL receptor | n.d. | 2.28 | 0.75 | 1.73 | 1.66 |
| ITGB2 | 177.22 | 3.37 | 1.78 | 3.57 | 12.99 |
| IL-17RA | n.d. | 2.96 | 1.30 | 2.84 | n.d. |
| TNF-R2 | 3.35 | 1.63 | 0.12 | 0.38 | 1.16 |
| MMP-9 | 5.91 | 5.41 | 5.65 | 1.64 | 10.91 |
| EPHB4 | 10.45 | 7.54 | 2.77 | 5.38 | 3.74 |
| IL2-RA | n.d. | 2.16 | 0.54 | 1.60 | 1.09 |
| OPG | 2.21 | 23.34 | 0.70 | 0.35 | 15.71 |
| ALCAM | 12.50 | 0.74 | 0.10 | 0.20 | 0.96 |
| TFF3 | 0.21 | 0.36 | n.d. | n.d. | n.d. |
| SELP | 38.85 | 3.37 | 0.22 | 1.21 | 4.12 |
| CSTB | 0.15 | 0.48 | 0.06 | 0.12 | 0.56 |
| MCP-1 | 0.23 | 0.05 | 0.03 | n.d. | 0.31 |
| CD163 | 58.29 | 9.58 | 3.70 | 3.88 | 9.75 |
| Gal-3 | 0.01 | 0.10 | 0.20 | 0.02 | 0.04 |
| GRN | 2.53 | 1.52 | 0.30 | 1.39 | 0.94 |
| NT-pro BNP | 1.79 | 1.43 | 2.10 | n.d. | n.d. |
| PLC | 393.75 | 104.23 | 57.97 | 46.08 | 27.07 |
| LTBR | 4.93 | 8.17 | 0.65 | 1.26 | 0.80 |
| Notch 3 | 18.37 | 34.77 | 2.23 | 14.48 | n.d. |
| TIMP4 | 0.35 | n.d. | 2.20 | 0.51 | n.d. |
| CNTN1 | 14.31 | 1.96 | 0.12 | 0.27 | 1.28 |
| CDH5 | 9.12 | 9.89 | 1.68 | 5.67 | 14.97 |
| TLT-2 | 2.38 | n.d. | 1.34 | n.d. | n.d. |
| FABP4 | 0.97 | 0.35 | 1.70 | n.d. | 0.66 |
| TFPI | 30.92 | 7.32 | 0.33 | 1.55 | 2.64 |
| PAI | n.d. | n.d. | 2.92 | 1.34 | 35.81 |
| CCL24 | 1.25 | 1.16 | 1.55 | 0.89 | 2.41 |
| TR | 26.82 | 33.87 | 38.54 | 17.37 | 50.56 |
| TNFRSF10C | n.d. | 3.45 | 0.59 | 1.11 | 1.17 |
| GDF-15 | n.d. | 4.90 | 1.91 | 0.96 | 6.24 |
| SELE | n.d. | 1.34 | 2.69 | 3.34 | 0.62 |
| AZU1 | 5.31 | 3.84 | 8.18 | 0.77 | 8.61 |
| DLK-1 | 3.33 | 0.90 | 0.42 | 0.53 | 0.73 |
| SPON1 | 2.90 | 2.59 | 1.53 | 1.57 | 2.04 |
| MPO | 5.77 | 9.32 | 39.93 | 3.86 | 28.13 |
| CXCL16 | 1.54 | 4.11 | 0.08 | 0.38 | 3.62 |
| IL-6RA | 33.34 | 4.05 | 0.40 | 3.14 | 8.97 |
| RETN | 1.31 | 1.36 | 0.16 | 0.30 | 2.75 |
| IGFBP-1 | 0.56 | 0.31 | 0.03 | 0.17 | 0.12 |
| CHIT1 | n.d. | n.d. | n.d. | n.d. | 1.40 |
| TR-AP | n.d. | n.d. | 0.94 | n.d. | n.d. |
| GP6 | 3.21 | 1.86 | 1.58 | 3.50 | 1.59 |
| Ep-CAM | 0.53 | 0.55 | 0.07 | 0.68 | 3.35 |
| AP-N | 33.91 | 41.97 | 9.96 | 26.71 | 78.09 |
| AXL | 25.68 | 4.48 | 0.75 | 2.16 | 1.97 |
| IL-1RT1 | n.d. | n.d. | 2.86 | 4.91 | 5.46 |
| FAS | 5.58 | 2.86 | 0.12 | 3.76 | 2.95 |
| TNFSF13B | n.d. | n.d. | n.d. | n.d. | n.d. |
| PRTN3 | 3.35 | 0.76 | 3.71 | 0.19 | 4.23 |
| PCSK9 | 2.65 | 2.32 | 2.11 | n.d. | 2.13 |
| Gal4 | n.d. | n.d. | 1.97 | n.d. | n.d. |
| OPN | 10.21 | 0.06 | 0.05 | 0.06 | 0.10 |
| CTSD | 2.11 | 1.15 |  | 0.33 | 1.21 |
| PGLYRP1 | 2.08 | 1.33 | 0.10 | 0.20 | 2.45 |
| CPA1 | n.d. | n.d. | 1.60 | n.d. | n.d. |
| JAM-A | n.d. | 71.52 | 49.25 | 34.31 | 104.91 |
| IL-1RT2 | 2.48 | n.d. | n.d. | n.d. | n.d. |
| SHPS-1 | 3.65 | 1.47 | 0.03 | 0.14 | 1.00 |
| CCL15 | 0.53 | 0.29 | 0.20 | 0.17 | 0.23 |
| CASP-3 | 4.06 | 1.22 | 0.88 | 0.65 | 1.71 |
| uPA | 11.15 | 9.14 | 8.86 | 2.87 | 21.47 |
| IGFBP-7 | 43.89 | 54.48 | 4.48 | 12.53 | 57.93 |
| CHI3L1 | n.d. | n.d. | n.d. | n.d. | 0.71 |
| ST2 | 2.25 | 1.61 | 1.94 | 1.15 | 1.48 |
| t-PA | 86.83 | 14.30 | 33.12 | 6.68 | 12.46 |
| SCGB3A2 | 1.00 | 2.21 | 1.32 | n.d. | n.d. |
| EGFR | n.d. | n.d. | n.d. | n.d. | 1.43 |
| CD93 | 78.91 | 19.11 | 1.69 | 2.93 | 36.65 |
| IL-18BP | 2.95 | 1.40 | 0.26 | 0.77 | 1.58 |
| COL1A1 | n.d. | n.d. | 2.07 | n.d. | 3.84 |
| PON3 | n.d. | 1.74 | 1.64 | n.d. | n.d. |
| CTSZ | n.d. | 2.23 | 1.77 | 1.28 | 2.83 |
| IGFBP-2 | 0.03 | 0.23 | 0.02 | 0.03 | 0.06 |
| RARRES2 | 0.18 | 0.18 | 0.14 | 0.09 | 0.60 |
| ICAM-2 | 8.20 | 9.53 | 1.52 | 4.71 | 1.91 |
| KLK6 | 0.05 | 0.02 | 0.02 | 0.05 | 0.07 |
| PDGF subunit A | n.d. | 0.64 | 1.76 | 0.80 | 1.84 |
| TNF-R1 | 3.07 | 1.10 | 0.12 | 0.27 | 0.34 |
| vWF | 37.06 | 37.55 | 9.51 | 22.78 | 27.56 |
| PECAM-1 | 448.89 | 110.99 | 26.49 | 32.71 | 58.56 |
| MEPE | 5.54 |  | 1.80 | n.d. | 1.04 |

Supplementary table 25: List of targets that showed enriched protein levels when comparing isolated brain capillaries to corresponding total brain samples of all patients suffering from TBI. Targets were considered to be enriched, when 3 out of 5 samples were enriched. A target was considered to be enriched, when it was equal to or greater than 1.3-fold. N=1, n=1

| survival time after TBI | contralateral | contusional |
| --- | --- | --- |
| 0h | AP-N, AZU1, CCL24, CD163, CD93, CDH5, EPHB4, GP6, ICAM-2, IGFBP-7, IL-17RA, IL-18BP, IL2-RA, IL-6RA, ITGB2, JAM-A, LDL receptor, LTBR, MEPE, MMP-9, MPO, Notch3, NT-pro BNP, PECAM-1, PLC, PON3, RETN, SELP, SPON1, ST2, TFPI, TNF-R2, t-PA, TR, uPA, vWF  (36) | ALCAM, AP-N, AXL, AZU1, CASP-3, CD163, CD93, CDH5, CNTN1, CTSD, CXCL16, DLK-1, EPHB4, FAS, GP6, GRN, ICAM-2, IGFBP-7, IL-18BP, IL-1RT2, IL-6RA, ITGB2, LTBR, MEPE, MMP-9, MPO, Notch3, NT-pro BNP, OPG, OPN, PCSK9, PECAM-1, PGLYRP1, PLC, PRTN3, RETN, SELP, SHPS-1, SPON1, ST2, TFPI, TLT-2, TNF-R1, TNF-R2, t-PA, TR, uPA, vWF  (48) |
| 4h | AP-N, AXL, AZU1, CASP-3, CD163, CD93, CDH5, CTSD, CTSZ, CXCL16, DLK-1, EGFR, EPHB4, FAS, GDF-15, GP6, GRN, ICAM-2, IGFBP-7, IL-17RA, IL-18BP, IL2-RA, IL-6RA, ITGB2, JAM-A, LDL receptor, LTBR, MMP-9, MPO, Notch3, NT-pro BNP, OPG, PDGF subunit A, PECAM-1, PGLYRP1, PLC, PRTN3, RARRES2, SCGB3A2, SELP, SPON1, ST2, TFPI, TLT-2, TNFRSF10C, t-PA, TR, TR-AP, uPA, vWF  (50) | AP-N, AXL, AZU1, CD163, CD93, CDH5, CNTN1, CTSZ, CXCL16, EPHB4, FAS, GDF-15, GP6, GRN, ICAM-2, IGFBP-7, IL-17RA, IL-18BP, IL2-RA, IL-6RA, ITGB2, JAM-A, LDL receptor, LTBR, MMP-9, MPO, Notch3, NT-pro BNP, OPG, PCSK9, PECAM-1, PGLYRP1, PLC, PON3, RETN, SCGB3A2, SELE, SELP, SHPS-1, SPON1, ST2, TFPI, TNF-R2, TNFRSF10C, t-PA, TR, uPA, vWF  (48) |
| 7h | AXL, CD163, CDH5, CHI3L1, CNTN4, CPA1, CTSZ, EGFR, EPHB4, GP6, ICAM-2, IGFBP-7, IL-17RA, IL-1RT1, IL-1RT2, ITGB2, JAM-A, LDL receptor, MEPE, MMP-9, MPO, Notch3, NT-pro BNP, PAI, PCSK9, PDGF subunit A, PECAM-1, PLC, PON3, PRTN3, SCGB3A2, SPON1, TIMP4, TLT-2, t-PA, TR, uPA, vWF  (38) | AP-N, AZU1, CCL24, CD163, CD93, CDH5, COL1A1, CPA1, CTSZ, EPHB4, FABP4, Gal4, GDF-15, GP6, ICAM-2, IGFBP-7, IL-17RA, IL-1RT1, ITGB2, JAM-A, MEPE, MMP-9, MPO, Notch3, NT-pro BNP, PAI, PCSK9, PDGF subunit A, PECAM-1, PLC, PON3, PRTN3, SCGB3A2, SELE, SPON1, ST2, TIMP4, TLT-2, t-PA, TR, uPA, vWF  (42) |
| 21h | AXL, AZU1, CASP-3, CCL24, CD163, CD93, CDH5, CTSZ, FAS, GDF-15, ICAM-2, IGFBP-7, IL-18BP, IL2-RA, IL-6RA, ITGB2, JAM-A, LDL receptor, MEPE, MMP-9, MPO, Notch3, PECAM-1, PGLYRP1, PLC, PRTN3, RETN, SELP, SPON1, ST2, TFPI, TNFRSF10C, t-PA, TR, uPA, vWF  (36) | LDL receptor, AP-N, AXL, CD163, CD93, CDH5, CTSZ, EPHB4, FAS, GP6, GRN, ICAM-2, IGFBP-7, IL-17RA, IL-1RT1, IL2-RA, IL-6RA, ITGB2, JAM-A, LTBR, MMP-9, MPO, Notch3, PAI, PECAM-1, PLC, SELE, SPON1, TFPI, t-PA, TR, uPA, vWF  (33) |
| 48h | AP-N, AZU1, CCL24, CD163, CD93, CDH5, COL1A1, CPA1, CTSZ, CXCL16, DLK-1, EGFR, Ep-CAM, EPHB4, Gal4, GP6, ICAM-2, IGFBP-7, IL-17RA, IL-18BP, IL-1RT1, IL-1RT2, IL2-RA, IL-6RA, ITGB2, JAM-A, LDL receptor, MMP-9, MPO, Notch3, NT-pro BNP, OPG, PAI, PCSK9, PECAM-1, PLC, PON3, SELE, SELP, SPON1, TNFSF13B, t-PA, TR, uPA, vWF (45) | AP-N, AXL, AZU1, CASP-3, CCL24, CD163, CD93, CDH5, CHIT1, CNTN1, COL1A1, CTSZ, CXCL16, EGFR, Ep-CAM, EPHB4, FAS, GDF-15, GP6, ICAM-2, IGFBP-7, IL-18BP, IL-1RT1, IL-6RA, ITGB2, JAM-A, MMP-9, MPO, OPG, PAI, PCSK9, PDGF subunit A, PECAM-1, PGLYRP1, PLC, PRTN3, RETN, SELP, SPON1, ST2, TFPI, t-PA, TR, uPA, vWF, LDL receptor  (46) |

Supplementary table 26: List of targets that showed decreased protein levels when comparing isolated brain capillaries to corresponding total brain samples of all patients suffering from TBI. Targets were considered to be decreased, when targets were decreased in 3 out of 5 samples. A target was considered to be decreased, when it was equal to or smaller than 0.7-fold. N=1, n=1

| survival time after TBI | contralateral | contusional |
| --- | --- | --- |
| 0h | ALCAM, CCL15, CNTN1, CSTB, CXCL16, Ep-CAM, Gal-3, IGFBP-2, KLK6, MCP-1, OPN, PDGF subunit A, RARRES2, SHPS-1, TFF3, TNF-R1, TNFRSF14  (17) | CCL15, CSTB, Ep-CAM, Gal-3, IGFBP-1, IGFBP-2, KLK6, MCP-1, RARRES2, TIMP4, TFF3  (11) |
| 4h | CCL15, CCL24, CNTN1, CSTB, FABP4, Gal-3, IGFBP-1, IGFBP-2, KLK6, MCP-1, OPN, SHPS-1, TFF3, TNF-R1, TNFRSF14  (15) | ALCAM, CCL15, CSTB, Ep-CAM, FABP4, Gal-3, IGFBP-1, IGFBP-2, KLK6, MCP-1, OPN, PDGF subunit A, RARRES2, TFF3  (14) |
| 7h | AZU1, CCL15, CD93, COL1A1, CSTB, CXCL16, DLK-1, FAS, Gal-3, GRN, IGFBP-1, IGFBP-2, IL-18BP, IL2-RA, IL-6RA, KLK6, LTBR, MCP-1, OPG, OPN, PGLYRP1, RARRES2, RETN, SELP, SHPS-1, TFF3, TFPI, TNF-R1, TNF-R2, TNFRSF10C, TNFRSF14  (31) | ALCAM, AXL, CCL15, CNTN1, CSTB, CXCL16, DLK-1, Ep-CAM, FAS, Gal-3, GRN, IGFBP-1, IGFBP-2, IL-18BP, IL2-RA, IL-6RA, KLK6, LDL receptor, LTBR, MCP-1, OPG, OPN, PGLYRP1, RARRES2, RETN, SELP, SHPS-1, TFPI, TNF-R1, TNF-R2, TNFRSF10C, TNFRSF14  (32) |
| 21h | ALCAM, CCL15, CNTN1, CSTB, CXCL16, Ep-CAM, Gal-3, IGFBP-1, IGFBP-2, KLK6, LTBR, MCP-1, OPN, PDGF subunit A, RARRES2, SHPS-1, TFF3, TNF-R1, TNF-R2, TNFRSF14  (20) | ALCAM, CASP-3, CCL15, CNTN1, CSTB, CTSD, CXCL16, DLK-1, Ep-CAM, Gal-3, IGFBP-1, IGFBP-2, KLK6, MCP-1, OPG, OPN, PGLYRP1, PRTN3, RARRES2, RETN, SHPS-1, TIMP4, TNF-R1, TNF-R2, TNFRSF14  (25) |
| 48h | ALCAM, CCL15, CHI3L1, CNTN1, CSTB, CTSD, FABP4, Gal-3, GRN, IGFBP-1, IGFBP-2, KLK6, LTBR, MCP-1, OPN, RARRES2, SHPS-1, TIMP4, TNF-R1, TNFRSF14  (20) | CCL15, CHI3L1, CSTB, DLK-1, FABP4, Gal-3, IGFBP-1, IGFBP-2, KLK6, MCP-1, OPN, RARRES2, SELE, TNF-R1, TNFRSF14  (15) |

Supplementary table 27: Targets with enriched or decreased protein levels in contusional capillaries normalized to corresponding contralateral capillaries in comparison to BCELC in triple-culture after 6h OGD and after 18h OGR (apical). Targets that were equal to or greater than 1.3-fold were considered to be enriched, whereas targets that were equal to or smaller than 0.7 were considered to be decreased. N=1-3, n=1-3

| survival time after TBI | Enriched | decreased |
| --- | --- | --- |
| 0h TBI | ALCAM, AP-N, AXL, AZU1, CASP-3, CCL15, CD163, CDH5, CNTN1, COL1A1, CSTB, CTSD, CXCL16, Ep-CAM, EPHB4, FAS, GRN, ICAM-2, IGFBP-2, IL-1RT1, IL-6RA, ITGB2, JAM-A, KLK6, LDL receptor, MEPE, MMP-9, MPO, OPN, PDGF subunit A, PECAM-1, PGLYRP1, PRTN3, RARRES2, RETN, SELP, SHPS-1, TFPI, TNF-R1, TR (40) | vWF (1) |
| 4h TBI | ALCAM, AXL, CNTN1, COL1A1, CXCL16, IGFBP-2, IGFBP-7, LTBR, Notch3, OPG, SHPS-1, TNF-R1, TNF-R2, TNFRSF14, vWF  (15) | CD163, CTSD, DLK-1, IL2-RA, ITGB2, KLK6, MCP-1, NT-pro BNP, RARRES2, SELP, t-PA  (11) |
| 7h TBI | AZU1, MCP-1, MMP-9, MPO, PAI, PRTN3, SELE, SELP, ST2, vWF, ITGB2  (11) | ALCAM, AP-N, AXL, CD163, CD93, CDH5, CNTN1, CSTB, CTSZ, CXCL16, Ep-CAM, FAS, Gal-3, GDF-15, GRN, ICAM-2, IGFBP-1, IGFBP-2, IGFBP-7, IL-1RT1, IL2-RA, JAM-A, KLK6, LDL receptor, LTBR, Notch3, OPG, PECAM-1, PLC, RARRES2, SHPS-1, SPON1, TFPI, TNF-R1, TNF-R2, TNFRSF14, t-PA, TR  (38) |
| 21h TBI | ALCAM, AP-N, AZU1, CD163, CD93, CNTN1, CSTB, CTSZ, CXCL16, Ep-CAM, EPHB4, FAS, GDF-15, GRN, ICAM-2, IGFBP-7, IL-18BP, IL-1RT1, IL-6RA, ITGB2, JAM-A, LDL receptor, LTBR, MCP-1, MMP-9, MPO, Notch3, OPG, OPN, PECAM-1, PGLYRP1, PLC, PRTN3, RETN, SELE, SELP, SHPS-1, ST2, TFPI, TNF-R1, TNFRSF10C, TNFRSF14, t-PA, TR, uPA, vWF (46) | / |
| 48h TBI | ALCAM, AP-N, AXL, AZU1, CASP-3, CD163, CD93, CDH5, CHIT1, CNTN1, COL1A1, CSTB, CTSD, CTSZ, CXCL16, Ep-CAM, FABP4, FAS, Gal-3, GDF-15, GRN, ICAM-2, IGFBP-2, IGFBP-7, IL-1RT1, IL-6RA, ITGB2, JAM-A, KLK6, LDL receptor, LTBR, MEPE, MMP-9, MPO, Notch3, OPG, OPN, PAI, PDGF subunit A, PECAM-1, PGLYRP1, PLC, PRTN3, RARRES2, RETN, SELP, SHPS-1, ST2, TFPI, TNF-R1, TNFRSF10C, TNFRSF14, t-PA, TR, uPA, vWF  (56) | GP6 (1) |
| 6h OGD | ALCAM, AP-N, AXL, CASP-3, CD93, COL1A1, CSTB, CTSD, CTSZ, DLK-1, EGFR, Ep-CAM, EPHB4, FAS, Gal-3, GDF-15, GRN, IGFBP-7, IL-17RA, IL-6RA, ITGB2, JAM-A, LDL receptor, LTBR, MMP-2, Notch3, OPG, PAI, PLC, RARRES2, SELE, SHPS-1, TFPI, TNF-R1, TNFRSF10C, t-PA, TR, TR-AP, uPA  (39) | KLK6, OPN (2) |
| 6h OGD + 18h OGR | ALCAM, AP-N, AXL, BLM hydrolase, CASP-3, CCL15, CD93, CNTN1, COL1A1, CSTB, CTSD, CTSZ, CXCL16, DLK-1, EGFR, Ep-CAM, EPHB4, FAS, Gal-3, GDF-15, GRN, IGFBP-2, IGFBP-7, IL-17RA, IL-6RA, ITGB2, JAM-A, KLK6, LDL receptor, LTBR, MCP-1, MMP-2, MMP-9, Notch3, NT-pro BNP, OPG, OPN, PAI, PDGF subunit A, PLC, RARRES2, SHPS-1, TFPI, TIMP4, TNF-R1, TNFRSF10C, t-PA, TR, TR-AP, uPA  (50) | (0) |
